# Supplementary material for: Uninterrupted embryonic growth leading to viviparous propagule formation in woody mangrove
Source: Front Plant Sci. 2023 Jan 4;13:1061747. doi: 10.3389/fpls.2022.1061747 (PMC9846782; doi:10.3389/fpls.2022.1061747)
Supplement: Supplementary file 2 [file Table_1.xlsx]

## Sheet: Table S3
Table S3 GO enrichment of all modules that highly related to viviparous tissues
Tissues	Module	Correlation index	P-value	GO.ID	Term	Annotation	Significant	Expected	p.value	Ontology	Genes	p.adjust	GeneRatio
S2embryo	blue			GO:0015979	photosynthesis	44	21	3.46	1.6e-12	BP	evm.model.Contig10143.1366;evm.model.Contig10143.175;evm.model.Contig12381.139;evm.model.Contig12381.519;evm.model.Contig12381.56;evm.model.Contig2685.390;evm.model.Contig2685.622;evm.model.Contig2685.76;evm.model.Contig29751.267;evm.model.Contig29751.95;evm.model.Contig3230.20;evm.model.Contig33180.205;evm.model.Contig5386.1209;evm.model.Contig5386.403;evm.model.Contig5386.867;evm.model.Contig54…	7.552e-10	0.019981
				GO:1901566	organonitrogen compound biosynthetic process	916	113	71.96	3e-07	BP	evm.model.Contig10143.1307;evm.model.Contig10143.133;evm.model.Contig10143.572;evm.model.Contig10143.581;evm.model.Contig10143.582;evm.model.Contig10143.683;evm.model.Contig10143.878;evm.model.Contig10143.970;evm.model.Contig10660.124;evm.model.Contig10660.463;evm.model.Contig10660.464;evm.model.Contig10660.614;evm.model.Contig11642.1258;evm.model.Contig11642.140;evm.model.Contig11642.150;evm.mod…	2.36e-05	0.107517
				GO:1901576	organic substance biosynthetic process	1272	144	99.92	1e-06	BP	evm.model.Contig10143.1307;evm.model.Contig10143.133;evm.model.Contig10143.572;evm.model.Contig10143.581;evm.model.Contig10143.582;evm.model.Contig10143.683;evm.model.Contig10143.878;evm.model.Contig10143.970;evm.model.Contig10660.124;evm.model.Contig10660.463;evm.model.Contig10660.464;evm.model.Contig10660.614;evm.model.Contig11642.1258;evm.model.Contig11642.140;evm.model.Contig11642.150;evm.mod…	6.74286e-05	0.137012
				GO:0044249	cellular biosynthetic process	1248	141	98.04	1.6e-06	BP	evm.model.Contig10143.1307;evm.model.Contig10143.133;evm.model.Contig10143.572;evm.model.Contig10143.581;evm.model.Contig10143.582;evm.model.Contig10143.683;evm.model.Contig10143.878;evm.model.Contig10143.970;evm.model.Contig10660.124;evm.model.Contig10660.463;evm.model.Contig10660.464;evm.model.Contig10660.614;evm.model.Contig11642.1258;evm.model.Contig11642.140;evm.model.Contig11642.150;evm.mod…	8.39111e-05	0.134158
				GO:0034641	cellular nitrogen compound metabolic process	1309	146	102.83	2.1e-06	BP	evm.model.Contig10143.1307;evm.model.Contig10143.394;evm.model.Contig10143.45;evm.model.Contig10143.524;evm.model.Contig10143.572;evm.model.Contig10143.581;evm.model.Contig10143.582;evm.model.Contig10143.683;evm.model.Contig10143.878;evm.model.Contig10143.970;evm.model.Contig10660.124;evm.model.Contig10660.129;evm.model.Contig10660.25;evm.model.Contig10660.424;evm.model.Contig10660.463;evm.model.…	9.912e-05	0.138915
				GO:0033014	tetrapyrrole biosynthetic process	28	11	2.2	4e-06	BP	evm.model.Contig10143.970;evm.model.Contig2712.1082;evm.model.Contig2712.1792;evm.model.Contig29751.267;evm.model.Contig5482.389;evm.model.Contig7167.22;evm.model.Contig7167.558;evm.model.Contig75.13;evm.model.Contig8573.449;evm.model.Contig8624.198;evm.model.Contig9868.757	0.000157333	0.0104662
				GO:0033013	tetrapyrrole metabolic process	35	12	2.75	7.7e-06	BP	evm.model.Contig10143.970;evm.model.Contig2712.1082;evm.model.Contig2712.1792;evm.model.Contig29751.267;evm.model.Contig5482.389;evm.model.Contig7167.22;evm.model.Contig7167.558;evm.model.Contig75.13;evm.model.Contig8573.449;evm.model.Contig8624.198;evm.model.Contig8624.85;evm.model.Contig9868.757	0.000279569	0.0114177
				GO:0009058	biosynthetic process	1401	151	110.06	9.7e-06	BP	evm.model.Contig10143.1307;evm.model.Contig10143.133;evm.model.Contig10143.572;evm.model.Contig10143.581;evm.model.Contig10143.582;evm.model.Contig10143.683;evm.model.Contig10143.878;evm.model.Contig10143.970;evm.model.Contig10660.124;evm.model.Contig10660.463;evm.model.Contig10660.464;evm.model.Contig10660.614;evm.model.Contig10660.646;evm.model.Contig11642.1258;evm.model.Contig11642.140;evm.mod…	0.000305227	0.143673
				GO:0009987	cellular process	4336	389	340.62	2.5e-05	BP	evm.model.Contig10143.1074;evm.model.Contig10143.1285;evm.model.Contig10143.1297;evm.model.Contig10143.1307;evm.model.Contig10143.133;evm.model.Contig10143.1366;evm.model.Contig10143.139;evm.model.Contig10143.175;evm.model.Contig10143.374;evm.model.Contig10143.394;evm.model.Contig10143.45;evm.model.Contig10143.524;evm.model.Contig10143.547;evm.model.Contig10143.572;evm.model.Contig10143.581;evm.m…	0.0007375	0.370124
				GO:0044271	cellular nitrogen compound biosynthetic process	800	93	62.84	4.7e-05	BP	evm.model.Contig10143.1307;evm.model.Contig10143.572;evm.model.Contig10143.581;evm.model.Contig10143.582;evm.model.Contig10143.683;evm.model.Contig10143.878;evm.model.Contig10143.970;evm.model.Contig10660.124;evm.model.Contig10660.463;evm.model.Contig11642.1258;evm.model.Contig11642.140;evm.model.Contig11642.150;evm.model.Contig11642.1651;evm.model.Contig11642.1745;evm.model.Contig11642.581;evm.m…	0.00123244	0.0884872
				GO:0044237	cellular metabolic process	3355	310	263.56	5.3e-05	BP	evm.model.Contig10143.1307;evm.model.Contig10143.133;evm.model.Contig10143.1366;evm.model.Contig10143.175;evm.model.Contig10143.394;evm.model.Contig10143.45;evm.model.Contig10143.524;evm.model.Contig10143.547;evm.model.Contig10143.572;evm.model.Contig10143.581;evm.model.Contig10143.582;evm.model.Contig10143.683;evm.model.Contig10143.878;evm.model.Contig10143.970;evm.model.Contig10143.98;evm.model…	0.00131663	0.294957
				GO:1901360	organic cyclic compound metabolic process	892	98	70.07	0.00025	BP	evm.model.Contig10143.394;evm.model.Contig10143.45;evm.model.Contig10143.524;evm.model.Contig10143.683;evm.model.Contig10143.970;evm.model.Contig10660.129;evm.model.Contig10660.25;evm.model.Contig10660.424;evm.model.Contig10660.463;evm.model.Contig10660.602;evm.model.Contig11642.1098;evm.model.Contig11642.150;evm.model.Contig11642.1745;evm.model.Contig11642.442;evm.model.Contig11642.581;evm.model…	0.00472	0.0932445
				GO:0046483	heterocycle metabolic process	861	95	67.64	0.00027	BP	evm.model.Contig10143.394;evm.model.Contig10143.45;evm.model.Contig10143.524;evm.model.Contig10143.683;evm.model.Contig10143.970;evm.model.Contig10660.129;evm.model.Contig10660.25;evm.model.Contig10660.424;evm.model.Contig10660.463;evm.model.Contig10660.602;evm.model.Contig11642.1098;evm.model.Contig11642.150;evm.model.Contig11642.1745;evm.model.Contig11642.442;evm.model.Contig11642.581;evm.model…	0.00490154	0.0903901
				GO:0006725	cellular aromatic compound metabolic process	858	93	67.4	0.00059	BP	evm.model.Contig10143.394;evm.model.Contig10143.45;evm.model.Contig10143.524;evm.model.Contig10143.683;evm.model.Contig10143.970;evm.model.Contig10660.129;evm.model.Contig10660.25;evm.model.Contig10660.424;evm.model.Contig10660.602;evm.model.Contig11642.1098;evm.model.Contig11642.150;evm.model.Contig11642.1745;evm.model.Contig11642.442;evm.model.Contig11642.581;evm.model.Contig12381.212;evm.model…	0.00898323	0.0884872
				GO:0006412	translation	497	59	39.04	0.00075	BP	evm.model.Contig10143.1307;evm.model.Contig10143.572;evm.model.Contig10143.581;evm.model.Contig10143.582;evm.model.Contig10143.878;evm.model.Contig10660.124;evm.model.Contig11642.1258;evm.model.Contig11642.1651;evm.model.Contig11642.1745;evm.model.Contig11642.744;evm.model.Contig12381.194;evm.model.Contig2581.304;evm.model.Contig2581.454;evm.model.Contig2685.100;evm.model.Contig2685.1070;evm.mode…	0.00996444	0.056137
				GO:0006807	nitrogen compound metabolic process	3072	279	241.32	0.00075	BP	evm.model.Contig10143.1307;evm.model.Contig10143.133;evm.model.Contig10143.394;evm.model.Contig10143.45;evm.model.Contig10143.524;evm.model.Contig10143.528;evm.model.Contig10143.572;evm.model.Contig10143.581;evm.model.Contig10143.582;evm.model.Contig10143.683;evm.model.Contig10143.723;evm.model.Contig10143.878;evm.model.Contig10143.970;evm.model.Contig10143.98;evm.model.Contig10440.130;evm.model.…	0.00996444	0.265461
				GO:0006779	porphyrin-containing compound biosynthetic process	16	6	1.26	0.00093	BP	evm.model.Contig2712.1792;evm.model.Contig29751.267;evm.model.Contig5482.389;evm.model.Contig7167.558;evm.model.Contig75.13;evm.model.Contig9868.757	0.0116185	0.00570885
				GO:0034645	cellular macromolecule biosynthetic process	716	79	56.25	0.00095	BP	evm.model.Contig10143.1307;evm.model.Contig10143.572;evm.model.Contig10143.581;evm.model.Contig10143.582;evm.model.Contig10143.878;evm.model.Contig10660.124;evm.model.Contig11642.1258;evm.model.Contig11642.1651;evm.model.Contig11642.1745;evm.model.Contig11642.581;evm.model.Contig11642.660;evm.model.Contig11642.744;evm.model.Contig12381.194;evm.model.Contig12381.511;evm.model.Contig14326.76;evm.mo…	0.0116185	0.0751665
				GO:0043043	peptide biosynthetic process	502	59	39.44	0.00096	BP	evm.model.Contig10143.1307;evm.model.Contig10143.572;evm.model.Contig10143.581;evm.model.Contig10143.582;evm.model.Contig10143.878;evm.model.Contig10660.124;evm.model.Contig11642.1258;evm.model.Contig11642.1651;evm.model.Contig11642.1745;evm.model.Contig11642.744;evm.model.Contig12381.194;evm.model.Contig2581.304;evm.model.Contig2581.454;evm.model.Contig2685.100;evm.model.Contig2685.1070;evm.mode…	0.0116185	0.056137
				GO:0071704	organic substance metabolic process	4058	356	318.78	0.00102	BP	evm.model.Contig10143.1307;evm.model.Contig10143.133;evm.model.Contig10143.394;evm.model.Contig10143.45;evm.model.Contig10143.524;evm.model.Contig10143.528;evm.model.Contig10143.547;evm.model.Contig10143.572;evm.model.Contig10143.581;evm.model.Contig10143.582;evm.model.Contig10143.683;evm.model.Contig10143.723;evm.model.Contig10143.878;evm.model.Contig10143.970;evm.model.Contig10143.98;evm.model.…	0.0116876	0.338725
				GO:0009059	macromolecule biosynthetic process	718	79	56.4	0.00103	BP	evm.model.Contig10143.1307;evm.model.Contig10143.572;evm.model.Contig10143.581;evm.model.Contig10143.582;evm.model.Contig10143.878;evm.model.Contig10660.124;evm.model.Contig11642.1258;evm.model.Contig11642.1651;evm.model.Contig11642.1745;evm.model.Contig11642.581;evm.model.Contig11642.660;evm.model.Contig11642.744;evm.model.Contig12381.194;evm.model.Contig12381.511;evm.model.Contig14326.76;evm.mo…	0.0116876	0.0751665
				GO:0006518	peptide metabolic process	514	60	40.38	0.00104	BP	evm.model.Contig10143.1307;evm.model.Contig10143.572;evm.model.Contig10143.581;evm.model.Contig10143.582;evm.model.Contig10143.878;evm.model.Contig10660.124;evm.model.Contig11642.1258;evm.model.Contig11642.1651;evm.model.Contig11642.1745;evm.model.Contig11642.744;evm.model.Contig12381.194;evm.model.Contig14326.939;evm.model.Contig2581.304;evm.model.Contig2581.454;evm.model.Contig2685.100;evm.mode…	0.0116876	0.0570885
				GO:0010467	gene expression	719	79	56.48	0.00107	BP	evm.model.Contig10143.1307;evm.model.Contig10143.394;evm.model.Contig10143.572;evm.model.Contig10143.581;evm.model.Contig10143.582;evm.model.Contig10143.878;evm.model.Contig10660.124;evm.model.Contig10660.129;evm.model.Contig10660.602;evm.model.Contig11642.1258;evm.model.Contig11642.1651;evm.model.Contig11642.1745;evm.model.Contig11642.581;evm.model.Contig11642.744;evm.model.Contig12381.194;evm.m…	0.0117451	0.0751665
				GO:0046148	pigment biosynthetic process	17	6	1.34	0.00134	BP	evm.model.Contig29751.267;evm.model.Contig5252.926;evm.model.Contig5482.389;evm.model.Contig7167.558;evm.model.Contig9220.641;evm.model.Contig9868.757	0.0131767	0.00570885
				GO:0043604	amide biosynthetic process	531	61	41.71	0.0014	BP	evm.model.Contig10143.1307;evm.model.Contig10143.572;evm.model.Contig10143.581;evm.model.Contig10143.582;evm.model.Contig10143.878;evm.model.Contig10660.124;evm.model.Contig11642.1258;evm.model.Contig11642.1651;evm.model.Contig11642.1745;evm.model.Contig11642.744;evm.model.Contig12381.194;evm.model.Contig2581.304;evm.model.Contig2581.454;evm.model.Contig2685.100;evm.model.Contig2685.1070;evm.mode…	0.0132345	0.05804
				GO:0006778	porphyrin-containing compound metabolic process	23	7	1.81	0.00143	BP	evm.model.Contig2712.1792;evm.model.Contig29751.267;evm.model.Contig5482.389;evm.model.Contig7167.558;evm.model.Contig75.13;evm.model.Contig8624.85;evm.model.Contig9868.757	0.0132345	0.00666032
				GO:0042440	pigment metabolic process	24	7	1.89	0.00189	BP	evm.model.Contig29751.267;evm.model.Contig5252.926;evm.model.Contig5482.389;evm.model.Contig7167.558;evm.model.Contig8624.85;evm.model.Contig9220.641;evm.model.Contig9868.757	0.0156505	0.00666032
				GO:0043603	cellular amide metabolic process	552	62	43.36	0.00222	BP	evm.model.Contig10143.1307;evm.model.Contig10143.572;evm.model.Contig10143.581;evm.model.Contig10143.582;evm.model.Contig10143.878;evm.model.Contig10660.124;evm.model.Contig11642.1258;evm.model.Contig11642.1651;evm.model.Contig11642.1745;evm.model.Contig11642.744;evm.model.Contig12381.194;evm.model.Contig14326.939;evm.model.Contig2581.304;evm.model.Contig2581.454;evm.model.Contig2685.100;evm.mode…	0.0177	0.0589914
				GO:0019725	cellular homeostasis	124	19	9.74	0.00354	BP	evm.model.Contig12381.141;evm.model.Contig12381.513;evm.model.Contig14326.869_evm.model.Contig14326.870;evm.model.Contig2581.784;evm.model.Contig2685.117;evm.model.Contig2712.798;evm.model.Contig2712.945;evm.model.Contig33180.19;evm.model.Contig33180.51;evm.model.Contig5252.359;evm.model.Contig5373.344;evm.model.Contig6055.475;evm.model.Contig75.188;evm.model.Contig9220.15;evm.model.Contig9220.15…	0.0253164	0.018078
				GO:0042592	homeostatic process	138	20	10.84	0.00536	BP	evm.model.Contig12381.141;evm.model.Contig12381.513;evm.model.Contig14326.869_evm.model.Contig14326.870;evm.model.Contig2581.784;evm.model.Contig2685.117;evm.model.Contig2712.798;evm.model.Contig2712.945;evm.model.Contig33180.19;evm.model.Contig33180.51;evm.model.Contig5252.359;evm.model.Contig5373.344;evm.model.Contig5386.24;evm.model.Contig6055.475;evm.model.Contig75.188;evm.model.Contig9220.15…	0.0341881	0.0190295
				GO:0044238	primary metabolic process	3798	328	298.36	0.00727	BP	evm.model.Contig10143.1307;evm.model.Contig10143.133;evm.model.Contig10143.394;evm.model.Contig10143.45;evm.model.Contig10143.524;evm.model.Contig10143.528;evm.model.Contig10143.572;evm.model.Contig10143.581;evm.model.Contig10143.582;evm.model.Contig10143.683;evm.model.Contig10143.723;evm.model.Contig10143.878;evm.model.Contig10143.98;evm.model.Contig10440.130;evm.model.Contig10660.124;evm.model.…	0.043436	0.312084
				GO:0090304	nucleic acid metabolic process	476	52	37.39	0.00855	BP	evm.model.Contig10143.394;evm.model.Contig10143.45;evm.model.Contig10143.524;evm.model.Contig10660.129;evm.model.Contig10660.424;evm.model.Contig10660.602;evm.model.Contig11642.1098;evm.model.Contig11642.1745;evm.model.Contig11642.581;evm.model.Contig14326.670;evm.model.Contig14326.76;evm.model.Contig16184.119;evm.model.Contig2581.264;evm.model.Contig2581.877;evm.model.Contig2685.362;evm.model.Co…	0.0480429	0.0494767
				GO:0009579	thylakoid	39	17	3.16	1.8e-09	CC	evm.model.Contig10143.1366;evm.model.Contig10143.175;evm.model.Contig12381.139;evm.model.Contig12381.56;evm.model.Contig2685.390;evm.model.Contig2685.622;evm.model.Contig2685.76;evm.model.Contig29751.95;evm.model.Contig3230.20;evm.model.Contig5386.1209;evm.model.Contig5386.403;evm.model.Contig5386.867;evm.model.Contig5482.252;evm.model.Contig5483.541;evm.model.Contig6055.155;evm.model.Contig6055.…	2.832e-07	0.0161751
				GO:0044436	thylakoid part	39	17	3.16	1.8e-09	CC	evm.model.Contig10143.1366;evm.model.Contig10143.175;evm.model.Contig12381.139;evm.model.Contig12381.56;evm.model.Contig2685.390;evm.model.Contig2685.622;evm.model.Contig2685.76;evm.model.Contig29751.95;evm.model.Contig3230.20;evm.model.Contig5386.1209;evm.model.Contig5386.403;evm.model.Contig5386.867;evm.model.Contig5482.252;evm.model.Contig5483.541;evm.model.Contig6055.155;evm.model.Contig6055.…	2.832e-07	0.0161751
				GO:0009521	photosystem	37	16	3	6.5e-09	CC	evm.model.Contig10143.1366;evm.model.Contig10143.175;evm.model.Contig12381.139;evm.model.Contig12381.56;evm.model.Contig2685.390;evm.model.Contig2685.622;evm.model.Contig2685.76;evm.model.Contig29751.95;evm.model.Contig3230.20;evm.model.Contig5386.1209;evm.model.Contig5386.403;evm.model.Contig5386.867;evm.model.Contig5482.252;evm.model.Contig5483.541;evm.model.Contig6055.155;evm.model.Contig6055.…	7.67e-07	0.0152236
				GO:0034357	photosynthetic membrane	38	16	3.08	1e-08	CC	evm.model.Contig10143.1366;evm.model.Contig10143.175;evm.model.Contig12381.139;evm.model.Contig12381.56;evm.model.Contig2685.390;evm.model.Contig2685.622;evm.model.Contig2685.76;evm.model.Contig29751.95;evm.model.Contig3230.20;evm.model.Contig5386.1209;evm.model.Contig5386.403;evm.model.Contig5386.867;evm.model.Contig5482.252;evm.model.Contig5483.541;evm.model.Contig6055.155;evm.model.Contig6055.…	9.44e-07	0.0152236
				GO:0009523	photosystem II	25	11	2.03	1.3e-06	CC	evm.model.Contig10143.175;evm.model.Contig12381.139;evm.model.Contig12381.56;evm.model.Contig2685.622;evm.model.Contig2685.76;evm.model.Contig29751.95;evm.model.Contig5386.1209;evm.model.Contig5482.252;evm.model.Contig5483.541;evm.model.Contig6055.155;evm.model.Contig6055.361	7.67e-05	0.0104662
				GO:0098796	membrane protein complex	152	30	12.33	2.7e-06	CC	evm.model.Contig10143.1366;evm.model.Contig10143.175;evm.model.Contig10143.783;evm.model.Contig12381.139;evm.model.Contig12381.56;evm.model.Contig14326.650;evm.model.Contig14326.939;evm.model.Contig242890.1;evm.model.Contig2685.1080;evm.model.Contig2685.390;evm.model.Contig2685.622;evm.model.Contig2685.76;evm.model.Contig2800.17;evm.model.Contig29751.95;evm.model.Contig3230.20;evm.model.Contig323…	0.000115855	0.0285442
				GO:0009654	photosystem II oxygen evolving complex	18	8	1.46	3.6e-05	CC	evm.model.Contig10143.175;evm.model.Contig12381.56;evm.model.Contig2685.622;evm.model.Contig2685.76;evm.model.Contig29751.95;evm.model.Contig5386.1209;evm.model.Contig5482.252;evm.model.Contig6055.361	0.000999529	0.0076118
				GO:0042651	thylakoid membrane	20	8	1.62	9.1e-05	CC	evm.model.Contig10143.175;evm.model.Contig12381.56;evm.model.Contig2685.622;evm.model.Contig2685.76;evm.model.Contig29751.95;evm.model.Contig5386.1209;evm.model.Contig5482.252;evm.model.Contig6055.361	0.0021476	0.0076118
				GO:0032991	protein-containing complex	1102	116	89.37	0.00041	CC	evm.model.Contig10143.1297;evm.model.Contig10143.1307;evm.model.Contig10143.1333;evm.model.Contig10143.1366;evm.model.Contig10143.139;evm.model.Contig10143.175;evm.model.Contig10143.374;evm.model.Contig10143.572;evm.model.Contig10143.581;evm.model.Contig10143.582;evm.model.Contig10143.783;evm.model.Contig10143.878;evm.model.Contig10660.124;evm.model.Contig10660.129;evm.model.Contig10660.463;evm.m…	0.00691143	0.110371
				GO:0043228	non-membrane-bounded organelle	649	74	52.64	0.00076	CC	evm.model.Contig10143.1297;evm.model.Contig10143.1307;evm.model.Contig10143.139;evm.model.Contig10143.374;evm.model.Contig10143.572;evm.model.Contig10143.581;evm.model.Contig10143.582;evm.model.Contig10143.878;evm.model.Contig10660.124;evm.model.Contig10660.242;evm.model.Contig10660.313;evm.model.Contig11642.1258;evm.model.Contig11642.160;evm.model.Contig11642.205;evm.model.Contig11642.304;evm.mo…	0.00996444	0.0704091
				GO:0043232	intracellular non-membrane-bounded organelle	649	74	52.64	0.00076	CC	evm.model.Contig10143.1297;evm.model.Contig10143.1307;evm.model.Contig10143.139;evm.model.Contig10143.374;evm.model.Contig10143.572;evm.model.Contig10143.581;evm.model.Contig10143.582;evm.model.Contig10143.878;evm.model.Contig10660.124;evm.model.Contig10660.242;evm.model.Contig10660.313;evm.model.Contig11642.1258;evm.model.Contig11642.160;evm.model.Contig11642.205;evm.model.Contig11642.304;evm.mo…	0.00996444	0.0704091
				GO:1990904	ribonucleoprotein complex	406	50	32.93	0.00123	CC	evm.model.Contig10143.1307;evm.model.Contig10143.1333;evm.model.Contig10143.572;evm.model.Contig10143.581;evm.model.Contig10143.582;evm.model.Contig10143.878;evm.model.Contig10660.124;evm.model.Contig11642.1258;evm.model.Contig11642.744;evm.model.Contig12381.194;evm.model.Contig2581.304;evm.model.Contig2581.454;evm.model.Contig2685.100;evm.model.Contig2685.347;evm.model.Contig2685.723;evm.model.C…	0.0125532	0.0475737
				GO:0044430	cytoskeletal part	147	23	11.92	0.00143	CC	evm.model.Contig10143.1297;evm.model.Contig10143.139;evm.model.Contig10143.374;evm.model.Contig10660.242;evm.model.Contig10660.313;evm.model.Contig11642.160;evm.model.Contig11642.304;evm.model.Contig14326.12;evm.model.Contig14326.50;evm.model.Contig14326.655;evm.model.Contig166052.1;evm.model.Contig2685.869;evm.model.Contig3098.180;evm.model.Contig5252.1296;evm.model.Contig5252.338;evm.model.Cont…	0.0132345	0.0218839
				GO:0005874	microtubule	29	8	2.35	0.00162	CC	evm.model.Contig10660.242;evm.model.Contig10660.313;evm.model.Contig11642.304;evm.model.Contig14326.655;evm.model.Contig166052.1;evm.model.Contig5252.338;evm.model.Contig8624.653;evm.model.Contig9867.671	0.01416	0.0076118
				GO:0009522	photosystem I	12	5	0.97	0.00167	CC	evm.model.Contig10143.1366;evm.model.Contig2685.390;evm.model.Contig3230.20;evm.model.Contig5386.403;evm.model.Contig5386.867	0.0143316	0.00475737
				GO:0005819	spindle	13	5	1.05	0.00254	CC	evm.model.Contig10660.313;evm.model.Contig14326.12;evm.model.Contig166052.1;evm.model.Contig5252.338;evm.model.Contig9867.671	0.0193368	0.00475737
				GO:0019898	extrinsic component of membrane	19	6	1.54	0.00297	CC	evm.model.Contig10143.175;evm.model.Contig2685.622;evm.model.Contig29751.95;evm.model.Contig5386.1209;evm.model.Contig5482.252;evm.model.Contig6055.361	0.0219037	0.00570885
				GO:1990204	oxidoreductase complex	34	8	2.76	0.00478	CC	evm.model.Contig10143.175;evm.model.Contig12381.56;evm.model.Contig2685.622;evm.model.Contig2685.76;evm.model.Contig29751.95;evm.model.Contig5386.1209;evm.model.Contig5482.252;evm.model.Contig6055.361	0.0317769	0.0076118
				GO:0005840	ribosome	370	44	30.01	0.00487	CC	evm.model.Contig10143.1307;evm.model.Contig10143.572;evm.model.Contig10143.581;evm.model.Contig10143.582;evm.model.Contig10143.878;evm.model.Contig10660.124;evm.model.Contig11642.1258;evm.model.Contig11642.744;evm.model.Contig12381.194;evm.model.Contig2581.304;evm.model.Contig2581.454;evm.model.Contig2685.100;evm.model.Contig2685.347;evm.model.Contig2685.723;evm.model.Contig2685.992;evm.model.Con…	0.0319256	0.0418649
				GO:0099080	supramolecular complex	36	8	2.92	0.00691	CC	evm.model.Contig10660.242;evm.model.Contig10660.313;evm.model.Contig11642.304;evm.model.Contig14326.655;evm.model.Contig166052.1;evm.model.Contig5252.338;evm.model.Contig8624.653;evm.model.Contig9867.671	0.0418144	0.0076118
				GO:0099081	supramolecular polymer	36	8	2.92	0.00691	CC	evm.model.Contig10660.242;evm.model.Contig10660.313;evm.model.Contig11642.304;evm.model.Contig14326.655;evm.model.Contig166052.1;evm.model.Contig5252.338;evm.model.Contig8624.653;evm.model.Contig9867.671	0.0418144	0.0076118
				GO:0099512	supramolecular fiber	36	8	2.92	0.00691	CC	evm.model.Contig10660.242;evm.model.Contig10660.313;evm.model.Contig11642.304;evm.model.Contig14326.655;evm.model.Contig166052.1;evm.model.Contig5252.338;evm.model.Contig8624.653;evm.model.Contig9867.671	0.0418144	0.0076118
				GO:0099513	polymeric cytoskeletal fiber	36	8	2.92	0.00691	CC	evm.model.Contig10660.242;evm.model.Contig10660.313;evm.model.Contig11642.304;evm.model.Contig14326.655;evm.model.Contig166052.1;evm.model.Contig5252.338;evm.model.Contig8624.653;evm.model.Contig9867.671	0.0418144	0.0076118
				GO:0044444	cytoplasmic part	738	77	59.85	0.00739	CC	evm.model.Contig10143.1307;evm.model.Contig10143.374;evm.model.Contig10143.572;evm.model.Contig10143.581;evm.model.Contig10143.582;evm.model.Contig10143.783;evm.model.Contig10143.878;evm.model.Contig10660.124;evm.model.Contig10660.129;evm.model.Contig11642.1258;evm.model.Contig11642.660;evm.model.Contig11642.744;evm.model.Contig12381.139;evm.model.Contig12381.194;evm.model.Contig14326.939;evm.mod…	0.043601	0.0732636
				GO:0003723	RNA binding	378	52	27.96	9.1e-06	MF	evm.model.Contig10143.313;evm.model.Contig10143.394;evm.model.Contig10143.418;evm.model.Contig10143.558;evm.model.Contig10143.57;evm.model.Contig10143.581;evm.model.Contig10143.582;evm.model.Contig10143.906;evm.model.Contig10440.100;evm.model.Contig10660.602;evm.model.Contig11642.1408;evm.model.Contig11642.239;evm.model.Contig12381.194;evm.model.Contig14326.180;evm.model.Contig14326.989;evm.model…	0.000305227	0.0494767
				GO:0017111	nucleoside-triphosphatase activity	738	82	54.59	0.00011	MF	evm.model.Contig10143.1285;evm.model.Contig10143.1297;evm.model.Contig10143.139;evm.model.Contig10143.330;evm.model.Contig10143.723;evm.model.Contig10660.242;evm.model.Contig10660.564;evm.model.Contig11642.1051;evm.model.Contig11642.1098;evm.model.Contig11642.1448;evm.model.Contig11642.160;evm.model.Contig11642.304;evm.model.Contig12381.36;evm.model.Contig12381.572;evm.model.Contig14326.180;evm.m…	0.00247238	0.0780209
				GO:0016462	pyrophosphatase activity	754	82	55.78	0.00022	MF	evm.model.Contig10143.1285;evm.model.Contig10143.1297;evm.model.Contig10143.139;evm.model.Contig10143.330;evm.model.Contig10143.723;evm.model.Contig10660.242;evm.model.Contig10660.564;evm.model.Contig11642.1051;evm.model.Contig11642.1098;evm.model.Contig11642.1448;evm.model.Contig11642.160;evm.model.Contig11642.304;evm.model.Contig12381.36;evm.model.Contig12381.572;evm.model.Contig14326.180;evm.m…	0.00472	0.0780209
				GO:0016817	hydrolase activity, acting on acid anhydrides	756	82	55.92	0.00024	MF	evm.model.Contig10143.1285;evm.model.Contig10143.1297;evm.model.Contig10143.139;evm.model.Contig10143.330;evm.model.Contig10143.723;evm.model.Contig10660.242;evm.model.Contig10660.564;evm.model.Contig11642.1051;evm.model.Contig11642.1098;evm.model.Contig11642.1448;evm.model.Contig11642.160;evm.model.Contig11642.304;evm.model.Contig12381.36;evm.model.Contig12381.572;evm.model.Contig14326.180;evm.m…	0.00472	0.0780209
				GO:0016818	hydrolase activity, acting on acid anhydrides, in phosphorus-containing anhydrides	756	82	55.92	0.00024	MF	evm.model.Contig10143.1285;evm.model.Contig10143.1297;evm.model.Contig10143.139;evm.model.Contig10143.330;evm.model.Contig10143.723;evm.model.Contig10660.242;evm.model.Contig10660.564;evm.model.Contig11642.1051;evm.model.Contig11642.1098;evm.model.Contig11642.1448;evm.model.Contig11642.160;evm.model.Contig11642.304;evm.model.Contig12381.36;evm.model.Contig12381.572;evm.model.Contig14326.180;evm.m…	0.00472	0.0780209
				GO:0005198	structural molecule activity	441	53	32.62	0.00029	MF	evm.model.Contig10143.1217;evm.model.Contig10143.1307;evm.model.Contig10143.572;evm.model.Contig10143.581;evm.model.Contig10143.582;evm.model.Contig10143.783;evm.model.Contig10143.878;evm.model.Contig10660.124;evm.model.Contig10660.242;evm.model.Contig11642.1258;evm.model.Contig11642.304;evm.model.Contig11642.744;evm.model.Contig12381.194;evm.model.Contig14326.655;evm.model.Contig2581.304;evm.mod…	0.00506963	0.0504282
				GO:1901363	heterocyclic compound binding	4164	354	308.02	0.00044	MF	evm.model.Contig10143.1285;evm.model.Contig10143.1297;evm.model.Contig10143.133;evm.model.Contig10143.139;evm.model.Contig10143.146;evm.model.Contig10143.181;evm.model.Contig10143.313;evm.model.Contig10143.330;evm.model.Contig10143.394;evm.model.Contig10143.418;evm.model.Contig10143.45;evm.model.Contig10143.524;evm.model.Contig10143.558;evm.model.Contig10143.57;evm.model.Contig10143.581;evm.model…	0.00716138	0.336822
				GO:0097159	organic cyclic compound binding	4166	354	308.17	0.00046	MF	evm.model.Contig10143.1285;evm.model.Contig10143.1297;evm.model.Contig10143.133;evm.model.Contig10143.139;evm.model.Contig10143.146;evm.model.Contig10143.181;evm.model.Contig10143.313;evm.model.Contig10143.330;evm.model.Contig10143.394;evm.model.Contig10143.418;evm.model.Contig10143.45;evm.model.Contig10143.524;evm.model.Contig10143.558;evm.model.Contig10143.57;evm.model.Contig10143.581;evm.model…	0.00723733	0.336822
				GO:0003676	nucleic acid binding	1807	168	133.67	0.00064	MF	evm.model.Contig10143.146;evm.model.Contig10143.313;evm.model.Contig10143.394;evm.model.Contig10143.418;evm.model.Contig10143.45;evm.model.Contig10143.524;evm.model.Contig10143.558;evm.model.Contig10143.57;evm.model.Contig10143.581;evm.model.Contig10143.582;evm.model.Contig10143.906;evm.model.Contig10143.924;evm.model.Contig10440.100;evm.model.Contig10440.112;evm.model.Contig10660.282;evm.model.C…	0.00944	0.159848
				GO:0003735	structural constituent of ribosome	370	44	27.37	0.00114	MF	evm.model.Contig10143.1307;evm.model.Contig10143.572;evm.model.Contig10143.581;evm.model.Contig10143.582;evm.model.Contig10143.878;evm.model.Contig10660.124;evm.model.Contig11642.1258;evm.model.Contig11642.744;evm.model.Contig12381.194;evm.model.Contig2581.304;evm.model.Contig2581.454;evm.model.Contig2685.100;evm.model.Contig2685.347;evm.model.Contig2685.723;evm.model.Contig2685.992;evm.model.Con…	0.0122291	0.0418649
				GO:0035639	purine ribonucleoside triphosphate binding	1918	175	141.88	0.00118	MF	evm.model.Contig10143.1285;evm.model.Contig10143.1297;evm.model.Contig10143.139;evm.model.Contig10143.330;evm.model.Contig10143.723;evm.model.Contig10143.98;evm.model.Contig10440.130;evm.model.Contig10660.144;evm.model.Contig10660.242;evm.model.Contig10660.46;evm.model.Contig10660.564;evm.model.Contig11642.1051;evm.model.Contig11642.1098;evm.model.Contig11642.1103;evm.model.Contig11642.1332;evm.m…	0.0123769	0.166508
				GO:0016741	transferase activity, transferring one-carbon groups	236	31	17.46	0.00125	MF	evm.model.Contig10143.291;evm.model.Contig10143.45;evm.model.Contig10143.856;evm.model.Contig10660.129;evm.model.Contig10660.602;evm.model.Contig14326.100;evm.model.Contig14326.654;evm.model.Contig14326.676;evm.model.Contig2685.278;evm.model.Contig2685.335;evm.model.Contig2685.819;evm.model.Contig2712.1828;evm.model.Contig2712.293;evm.model.Contig29751.269;evm.model.Contig3230.183;evm.model.Conti…	0.0125532	0.0294957
				GO:0036094	small molecule binding	2380	211	176.06	0.00151	MF	evm.model.Contig10143.1285;evm.model.Contig10143.1297;evm.model.Contig10143.133;evm.model.Contig10143.139;evm.model.Contig10143.330;evm.model.Contig10143.723;evm.model.Contig10143.855;evm.model.Contig10143.98;evm.model.Contig10440.130;evm.model.Contig10660.144;evm.model.Contig10660.242;evm.model.Contig10660.46;evm.model.Contig10660.464;evm.model.Contig10660.564;evm.model.Contig11642.1051;evm.mode…	0.0137062	0.200761
				GO:0008168	methyltransferase activity	219	29	16.2	0.00156	MF	evm.model.Contig10143.291;evm.model.Contig10143.45;evm.model.Contig10143.856;evm.model.Contig10660.129;evm.model.Contig10660.602;evm.model.Contig14326.100;evm.model.Contig14326.654;evm.model.Contig14326.676;evm.model.Contig2685.819;evm.model.Contig2712.1828;evm.model.Contig2712.293;evm.model.Contig29751.269;evm.model.Contig3230.183;evm.model.Contig5252.1199;evm.model.Contig5252.731_evm.model.Cont…	0.0138928	0.0275928
				GO:0003887	DNA-directed DNA polymerase activity	19	6	1.41	0.00189	MF	evm.model.Contig11642.851;evm.model.Contig2712.1480;evm.model.Contig5252.974;evm.model.Contig5386.1239;evm.model.Contig5482.266;evm.model.Contig9220.819	0.0156505	0.00570885
				GO:0097367	carbohydrate derivative binding	2002	180	148.09	0.00196	MF	evm.model.Contig10143.1285;evm.model.Contig10143.1297;evm.model.Contig10143.139;evm.model.Contig10143.330;evm.model.Contig10143.723;evm.model.Contig10143.98;evm.model.Contig10440.130;evm.model.Contig10660.144;evm.model.Contig10660.242;evm.model.Contig10660.46;evm.model.Contig10660.564;evm.model.Contig11642.1051;evm.model.Contig11642.1098;evm.model.Contig11642.1103;evm.model.Contig11642.1332;evm.m…	0.0159503	0.171265
				GO:0032555	purine ribonucleotide binding	1958	176	144.84	0.00225	MF	evm.model.Contig10143.1285;evm.model.Contig10143.1297;evm.model.Contig10143.139;evm.model.Contig10143.330;evm.model.Contig10143.723;evm.model.Contig10143.98;evm.model.Contig10440.130;evm.model.Contig10660.144;evm.model.Contig10660.242;evm.model.Contig10660.46;evm.model.Contig10660.564;evm.model.Contig11642.1051;evm.model.Contig11642.1098;evm.model.Contig11642.1103;evm.model.Contig11642.1332;evm.m…	0.0177	0.16746
				GO:0032553	ribonucleotide binding	1984	178	146.76	0.0023	MF	evm.model.Contig10143.1285;evm.model.Contig10143.1297;evm.model.Contig10143.139;evm.model.Contig10143.330;evm.model.Contig10143.723;evm.model.Contig10143.98;evm.model.Contig10440.130;evm.model.Contig10660.144;evm.model.Contig10660.242;evm.model.Contig10660.46;evm.model.Contig10660.564;evm.model.Contig11642.1051;evm.model.Contig11642.1098;evm.model.Contig11642.1103;evm.model.Contig11642.1332;evm.m…	0.0177967	0.169363
				GO:0017076	purine nucleotide binding	2004	179	148.24	0.00272	MF	evm.model.Contig10143.1285;evm.model.Contig10143.1297;evm.model.Contig10143.139;evm.model.Contig10143.330;evm.model.Contig10143.723;evm.model.Contig10143.855;evm.model.Contig10143.98;evm.model.Contig10440.130;evm.model.Contig10660.144;evm.model.Contig10660.242;evm.model.Contig10660.46;evm.model.Contig10660.564;evm.model.Contig11642.1051;evm.model.Contig11642.1098;evm.model.Contig11642.1103;evm.mo…	0.0203784	0.170314
				GO:0140098	catalytic activity, acting on RNA	189	25	13.98	0.00322	MF	evm.model.Contig10143.558;evm.model.Contig10660.129;evm.model.Contig10660.602;evm.model.Contig11642.1745;evm.model.Contig11642.239;evm.model.Contig14326.76;evm.model.Contig2581.571;evm.model.Contig2685.819;evm.model.Contig2712.1927;evm.model.Contig2712.1973;evm.model.Contig2712.2007;evm.model.Contig3364.289;evm.model.Contig5373.390;evm.model.Contig5373.452;evm.model.Contig5386.1305;evm.model.Cont…	0.0233822	0.0237869
				GO:0004386	helicase activity	161	22	11.91	0.00372	MF	evm.model.Contig11642.1051;evm.model.Contig12381.36;evm.model.Contig14326.180;evm.model.Contig14326.830;evm.model.Contig196370.1;evm.model.Contig2685.26;evm.model.Contig2712.1903;evm.model.Contig2712.2010;evm.model.Contig2712.47;evm.model.Contig2712.776;evm.model.Contig33180.371;evm.model.Contig3364.196;evm.model.Contig5252.1498;evm.model.Contig5387.100;evm.model.Contig5387.37;evm.model.Contig548…	0.0262066	0.0209324
				GO:0000166	nucleotide binding	2250	197	166.44	0.00404	MF	evm.model.Contig10143.1285;evm.model.Contig10143.1297;evm.model.Contig10143.139;evm.model.Contig10143.330;evm.model.Contig10143.723;evm.model.Contig10143.855;evm.model.Contig10143.98;evm.model.Contig10440.130;evm.model.Contig10660.144;evm.model.Contig10660.242;evm.model.Contig10660.46;evm.model.Contig10660.464;evm.model.Contig10660.564;evm.model.Contig11642.1051;evm.model.Contig11642.1098;evm.mod…	0.0276359	0.187441
				GO:1901265	nucleoside phosphate binding	2250	197	166.44	0.00404	MF	evm.model.Contig10143.1285;evm.model.Contig10143.1297;evm.model.Contig10143.139;evm.model.Contig10143.330;evm.model.Contig10143.723;evm.model.Contig10143.855;evm.model.Contig10143.98;evm.model.Contig10440.130;evm.model.Contig10660.144;evm.model.Contig10660.242;evm.model.Contig10660.46;evm.model.Contig10660.464;evm.model.Contig10660.564;evm.model.Contig11642.1051;evm.model.Contig11642.1098;evm.mod…	0.0276359	0.187441
				GO:0043168	anion binding	2270	198	167.92	0.00468	MF	evm.model.Contig10143.1285;evm.model.Contig10143.1297;evm.model.Contig10143.133;evm.model.Contig10143.139;evm.model.Contig10143.330;evm.model.Contig10143.723;evm.model.Contig10143.98;evm.model.Contig10440.130;evm.model.Contig10660.144;evm.model.Contig10660.242;evm.model.Contig10660.46;evm.model.Contig10660.464;evm.model.Contig10660.564;evm.model.Contig11642.1051;evm.model.Contig11642.1098;evm.mod…	0.0315566	0.188392
				GO:0140101	catalytic activity, acting on a tRNA	88	14	6.51	0.00498	MF	evm.model.Contig10660.129;evm.model.Contig11642.1745;evm.model.Contig2581.571;evm.model.Contig2712.1927;evm.model.Contig3364.289;evm.model.Contig5373.390;evm.model.Contig5386.1305;evm.model.Contig5483.302;evm.model.Contig7167.110;evm.model.Contig7167.22;evm.model.Contig8573.442;evm.model.Contig8624.175;evm.model.Contig9220.1149;evm.model.Contig9220.997	0.0321994	0.0133206
				GO:0008026	ATP-dependent helicase activity	102	15	7.55	0.00783	MF	evm.model.Contig11642.1051;evm.model.Contig12381.36;evm.model.Contig14326.180;evm.model.Contig14326.830;evm.model.Contig196370.1;evm.model.Contig2685.26;evm.model.Contig2712.1903;evm.model.Contig3364.196;evm.model.Contig5252.1498;evm.model.Contig5387.37;evm.model.Contig5482.266;evm.model.Contig75.22;evm.model.Contig8624.606;evm.model.Contig9220.448;evm.model.Contig9868.424	0.0450702	0.0142721
				GO:0070035	purine NTP-dependent helicase activity	102	15	7.55	0.00783	MF	evm.model.Contig11642.1051;evm.model.Contig12381.36;evm.model.Contig14326.180;evm.model.Contig14326.830;evm.model.Contig196370.1;evm.model.Contig2685.26;evm.model.Contig2712.1903;evm.model.Contig3364.196;evm.model.Contig5252.1498;evm.model.Contig5387.37;evm.model.Contig5482.266;evm.model.Contig75.22;evm.model.Contig8624.606;evm.model.Contig9220.448;evm.model.Contig9868.424	0.0450702	0.0142721
				GO:0008144	drug binding	1769	156	130.86	0.00853	MF	evm.model.Contig10143.1297;evm.model.Contig10143.133;evm.model.Contig10143.139;evm.model.Contig10143.330;evm.model.Contig10143.723;evm.model.Contig10143.98;evm.model.Contig10440.130;evm.model.Contig10660.144;evm.model.Contig10660.46;evm.model.Contig11642.1051;evm.model.Contig11642.1098;evm.model.Contig11642.1332;evm.model.Contig11642.1448;evm.model.Contig11642.1450;evm.model.Contig11642.160;evm.m…	0.0480429	0.14843
S2embryo	darkred			GO:0003824	catalytic activity	5679	82	61.47	0.00016	MF	evm.model.Contig10143.1063;evm.model.Contig10143.894;evm.model.Contig10143.985;evm.model.Contig10660.405;evm.model.Contig10660.618;evm.model.Contig11518.11;evm.model.Contig11642.1338;evm.model.Contig11642.1490;evm.model.Contig11642.1580;evm.model.Contig11642.1581;evm.model.Contig11642.1583;evm.model.Contig11642.531;evm.model.Contig11642.620;evm.model.Contig11642.736;evm.model.Contig12381.448;evm.…	0.0125	0.525641
				GO:0016787	hydrolase activity	1770	35	19.16	0.0002	MF	evm.model.Contig10143.894;evm.model.Contig10143.985;evm.model.Contig10660.405;evm.model.Contig11642.1338;evm.model.Contig11642.1490;evm.model.Contig11642.1580;evm.model.Contig11642.1581;evm.model.Contig11642.1583;evm.model.Contig11642.531;evm.model.Contig12381.478;evm.model.Contig14326.109;evm.model.Contig14326.288;evm.model.Contig14326.632;evm.model.Contig2581.120;evm.model.Contig2581.94;evm.mod…	0.0125	0.224359
S3coty,S4coty	red			GO:0006825	copper ion transport	15	5	0.57	0.00016	BP	evm.model.Contig14326.1020;evm.model.Contig2581.689;evm.model.Contig33180.183;evm.model.Contig5482.49;evm.model.Contig9220.249	0.0173867	0.00974659
				GO:0030001	metal ion transport	176	16	6.64	0.00097	BP	evm.model.Contig10660.746;evm.model.Contig14326.1020;evm.model.Contig16892.2;evm.model.Contig2581.618;evm.model.Contig2581.689;evm.model.Contig2685.16;evm.model.Contig2712.1073;evm.model.Contig2712.1456;evm.model.Contig33180.183;evm.model.Contig5252.612;evm.model.Contig5482.49;evm.model.Contig5483.698;evm.model.Contig8624.567;evm.model.Contig9220.249;evm.model.Contig9867.39;evm.model.Contig9867.8…	0.0451743	0.0311891
				GO:0031090	organelle membrane	128	14	4.53	0.00013	CC	evm.model.Contig12381.65;evm.model.Contig14326.352;evm.model.Contig14326.72;evm.model.Contig2581.265;evm.model.Contig2712.1119;evm.model.Contig2712.1615;evm.model.Contig29751.178;evm.model.Contig3230.277;evm.model.Contig5252.529;evm.model.Contig5386.1051;evm.model.Contig70607.80;evm.model.Contig7167.408;evm.model.Contig9220.541;evm.model.Contig9867.73	0.0173867	0.0272904
				GO:0005743	mitochondrial inner membrane	37	7	1.31	0.00025	CC	evm.model.Contig14326.352;evm.model.Contig14326.72;evm.model.Contig2581.265;evm.model.Contig2712.1119;evm.model.Contig5252.529;evm.model.Contig70607.80;evm.model.Contig9220.541	0.01956	0.0136452
				GO:0019866	organelle inner membrane	38	7	1.34	0.0003	CC	evm.model.Contig14326.352;evm.model.Contig14326.72;evm.model.Contig2581.265;evm.model.Contig2712.1119;evm.model.Contig5252.529;evm.model.Contig70607.80;evm.model.Contig9220.541	0.01956	0.0136452
				GO:0005375	copper ion transmembrane transporter activity	14	5	0.51	9.3e-05	MF	evm.model.Contig14326.1020;evm.model.Contig2581.689;evm.model.Contig33180.183;evm.model.Contig5482.49;evm.model.Contig9220.249	0.0173867	0.00974659
				GO:0046915	transition metal ion transmembrane transporter activity	19	5	0.69	0.00046	MF	evm.model.Contig14326.1020;evm.model.Contig2581.689;evm.model.Contig33180.183;evm.model.Contig5482.49;evm.model.Contig9220.249	0.0249933	0.00974659
S3coty,S4coty	tan			GO:0015979	photosynthesis	44	5	0.7	0.00062	BP	evm.model.Contig11642.1663;evm.model.Contig2581.810;evm.model.Contig2712.262;evm.model.Contig5252.860;evm.model.Contig9868.404	0.019344	0.0188679
				GO:0009521	photosystem	37	5	0.64	0.00039	CC	evm.model.Contig11642.1663;evm.model.Contig2581.810;evm.model.Contig2712.262;evm.model.Contig5252.860;evm.model.Contig9868.404	0.019344	0.0188679
				GO:0034357	photosynthetic membrane	38	5	0.66	0.00044	CC	evm.model.Contig11642.1663;evm.model.Contig2581.810;evm.model.Contig2712.262;evm.model.Contig5252.860;evm.model.Contig9868.404	0.019344	0.0188679
				GO:0009579	thylakoid	39	5	0.68	0.0005	CC	evm.model.Contig11642.1663;evm.model.Contig2581.810;evm.model.Contig2712.262;evm.model.Contig5252.860;evm.model.Contig9868.404	0.019344	0.0188679
				GO:0044436	thylakoid part	39	5	0.68	0.0005	CC	evm.model.Contig11642.1663;evm.model.Contig2581.810;evm.model.Contig2712.262;evm.model.Contig5252.860;evm.model.Contig9868.404	0.019344	0.0188679
S3coty,S4coty	grey60			GO:0010467	gene expression	719	21	9.6	0.00044	BP	evm.model.Contig10143.752;evm.model.Contig10660.36;evm.model.Contig12381.382;evm.model.Contig14326.204;evm.model.Contig2712.1218;evm.model.Contig2712.550;evm.model.Contig29751.227;evm.model.Contig29751.260;evm.model.Contig3364.90;evm.model.Contig5252.1327;evm.model.Contig5252.577;evm.model.Contig5373.307;evm.model.Contig5373.421;evm.model.Contig5386.1023;evm.model.Contig5387.410;evm.model.Contig5…	0.0234667	0.12069
				GO:1901576	organic substance biosynthetic process	1272	30	16.98	0.00091	BP	evm.model.Contig10143.1034;evm.model.Contig10143.1120;evm.model.Contig10143.1246;evm.model.Contig10660.36;evm.model.Contig10660.442;evm.model.Contig11642.1637;evm.model.Contig14326.204;evm.model.Contig16184.105;evm.model.Contig2712.1063;evm.model.Contig2712.1218;evm.model.Contig2712.1398;evm.model.Contig2712.320;evm.model.Contig2712.550;evm.model.Contig2800.177;evm.model.Contig2800.248;evm.model.…	0.0253333	0.172414
				GO:0008610	lipid biosynthetic process	168	8	2.24	0.00176	BP	evm.model.Contig10143.1120;evm.model.Contig10143.1246;evm.model.Contig10660.442;evm.model.Contig2800.177;evm.model.Contig2800.248;evm.model.Contig2800.284;evm.model.Contig5386.20;evm.model.Contig9867.669	0.0352	0.045977
				GO:0044249	cellular biosynthetic process	1248	28	16.66	0.00303	BP	evm.model.Contig10143.1246;evm.model.Contig10660.36;evm.model.Contig10660.442;evm.model.Contig11642.1637;evm.model.Contig14326.204;evm.model.Contig16184.105;evm.model.Contig2712.1063;evm.model.Contig2712.1218;evm.model.Contig2712.1398;evm.model.Contig2712.320;evm.model.Contig2712.550;evm.model.Contig2800.177;evm.model.Contig2800.248;evm.model.Contig2800.284;evm.model.Contig29751.19;evm.model.Cont…	0.0497454	0.16092
				GO:0006518	peptide metabolic process	514	15	6.86	0.00323	BP	evm.model.Contig10660.36;evm.model.Contig2712.1218;evm.model.Contig2712.550;evm.model.Contig29751.227;evm.model.Contig29751.260;evm.model.Contig5252.1327;evm.model.Contig5252.577;evm.model.Contig5373.307;evm.model.Contig5373.421;evm.model.Contig5482.332;evm.model.Contig7167.132;evm.model.Contig8624.316;evm.model.Contig8624.585;evm.model.Contig9867.731;evm.model.Contig9867.912	0.0497454	0.0862069
				GO:1990904	ribonucleoprotein complex	406	15	5.49	0.0002	CC	evm.model.Contig10660.36;evm.model.Contig2712.1218;evm.model.Contig2712.550;evm.model.Contig29751.227;evm.model.Contig29751.260;evm.model.Contig3364.90;evm.model.Contig5252.1327;evm.model.Contig5252.577;evm.model.Contig5373.307;evm.model.Contig5387.410;evm.model.Contig5482.332;evm.model.Contig8624.316;evm.model.Contig8624.585;evm.model.Contig9867.731;evm.model.Contig9867.912	0.0234667	0.0862069
				GO:0044444	cytoplasmic part	738	21	9.98	0.0003	CC	evm.model.Contig10660.36;evm.model.Contig12381.457;evm.model.Contig2581.129;evm.model.Contig2685.1235;evm.model.Contig2712.1218;evm.model.Contig2712.550;evm.model.Contig29751.19;evm.model.Contig29751.227;evm.model.Contig29751.260;evm.model.Contig5252.1327;evm.model.Contig5252.577;evm.model.Contig5373.307;evm.model.Contig5373.421;evm.model.Contig5482.332;evm.model.Contig7167.132;evm.model.Contig85…	0.0234667	0.12069
				GO:0005840	ribosome	370	13	5	0.00095	CC	evm.model.Contig10660.36;evm.model.Contig2712.1218;evm.model.Contig2712.550;evm.model.Contig29751.227;evm.model.Contig29751.260;evm.model.Contig5252.1327;evm.model.Contig5252.577;evm.model.Contig5373.307;evm.model.Contig5482.332;evm.model.Contig8624.316;evm.model.Contig8624.585;evm.model.Contig9867.731;evm.model.Contig9867.912	0.0253333	0.0747126
				GO:0005737	cytoplasm	943	22	12.75	0.00342	CC	evm.model.Contig10660.36;evm.model.Contig12381.457;evm.model.Contig2581.129;evm.model.Contig2685.1235;evm.model.Contig2712.1218;evm.model.Contig2712.550;evm.model.Contig29751.19;evm.model.Contig29751.227;evm.model.Contig29751.260;evm.model.Contig29751.40;evm.model.Contig5252.1327;evm.model.Contig5252.577;evm.model.Contig5373.307;evm.model.Contig5373.421;evm.model.Contig5482.332;evm.model.Contig71…	0.0497454	0.126437
				GO:0003735	structural constituent of ribosome	370	13	4.73	0.00091	MF	evm.model.Contig10660.36;evm.model.Contig2712.1218;evm.model.Contig2712.550;evm.model.Contig29751.227;evm.model.Contig29751.260;evm.model.Contig5252.1327;evm.model.Contig5252.577;evm.model.Contig5373.307;evm.model.Contig5482.332;evm.model.Contig8624.316;evm.model.Contig8624.585;evm.model.Contig9867.731;evm.model.Contig9867.912	0.0253333	0.0747126
				GO:0005198	structural molecule activity	441	14	5.64	0.00154	MF	evm.model.Contig10660.36;evm.model.Contig2581.129;evm.model.Contig2712.1218;evm.model.Contig2712.550;evm.model.Contig29751.227;evm.model.Contig29751.260;evm.model.Contig5252.1327;evm.model.Contig5252.577;evm.model.Contig5373.307;evm.model.Contig5482.332;evm.model.Contig8624.316;evm.model.Contig8624.585;evm.model.Contig9867.731;evm.model.Contig9867.912	0.0352	0.0804598
S3axis,S4axis	pink			GO:0034641	cellular nitrogen compound metabolic process	1309	159	67.55	4.6e-29	BP	evm.model.Contig10143.1294;evm.model.Contig10143.230;evm.model.Contig10143.241;evm.model.Contig10143.440;evm.model.Contig10143.590;evm.model.Contig10660.434;evm.model.Contig10660.44;evm.model.Contig10660.478;evm.model.Contig10660.522;evm.model.Contig10660.590;evm.model.Contig10660.751;evm.model.Contig10660.85;evm.model.Contig11518.17;evm.model.Contig11642.1247;evm.model.Contig11642.1276;evm.model…	9.165e-27	0.253589
				GO:0044267	cellular protein metabolic process	1746	159	90.11	1.7e-15	BP	evm.model.Contig10143.1294;evm.model.Contig10143.230;evm.model.Contig10143.440;evm.model.Contig10143.590;evm.model.Contig10143.63;evm.model.Contig10143.832;evm.model.Contig10440.76;evm.model.Contig10660.434;evm.model.Contig10660.444;evm.model.Contig10660.478;evm.model.Contig10660.522;evm.model.Contig10660.590;evm.model.Contig10660.751;evm.model.Contig10660.85;evm.model.Contig11518.17;evm.model.Co…	7.99e-14	0.253589
				GO:0019538	protein metabolic process	2062	168	106.42	6.3e-12	BP	evm.model.Contig10143.1294;evm.model.Contig10143.230;evm.model.Contig10143.440;evm.model.Contig10143.590;evm.model.Contig10143.63;evm.model.Contig10143.832;evm.model.Contig10440.76;evm.model.Contig10660.434;evm.model.Contig10660.444;evm.model.Contig10660.478;evm.model.Contig10660.522;evm.model.Contig10660.590;evm.model.Contig10660.751;evm.model.Contig10660.85;evm.model.Contig11518.17;evm.model.Co…	1.974e-10	0.267943
				GO:0044260	cellular macromolecule metabolic process	2103	169	108.53	1.8e-11	BP	evm.model.Contig10143.1294;evm.model.Contig10143.230;evm.model.Contig10143.440;evm.model.Contig10143.590;evm.model.Contig10143.63;evm.model.Contig10143.832;evm.model.Contig10440.76;evm.model.Contig10660.434;evm.model.Contig10660.444;evm.model.Contig10660.478;evm.model.Contig10660.522;evm.model.Contig10660.590;evm.model.Contig10660.751;evm.model.Contig10660.85;evm.model.Contig11518.17;evm.model.Co…	5.076e-10	0.269537
				GO:1901564	organonitrogen compound metabolic process	2602	193	134.28	3.9e-10	BP	evm.model.Contig10143.1294;evm.model.Contig10143.230;evm.model.Contig10143.440;evm.model.Contig10143.590;evm.model.Contig10143.63;evm.model.Contig10143.832;evm.model.Contig10440.76;evm.model.Contig10660.434;evm.model.Contig10660.444;evm.model.Contig10660.478;evm.model.Contig10660.522;evm.model.Contig10660.590;evm.model.Contig10660.751;evm.model.Contig10660.85;evm.model.Contig11518.17;evm.model.Co…	9.99818e-09	0.307815
				GO:0043170	macromolecule metabolic process	2612	189	134.8	6.9e-09	BP	evm.model.Contig10143.1294;evm.model.Contig10143.230;evm.model.Contig10143.241;evm.model.Contig10143.440;evm.model.Contig10143.590;evm.model.Contig10143.63;evm.model.Contig10143.832;evm.model.Contig10440.76;evm.model.Contig10660.434;evm.model.Contig10660.444;evm.model.Contig10660.478;evm.model.Contig10660.522;evm.model.Contig10660.590;evm.model.Contig10660.751;evm.model.Contig10660.85;evm.model.C…	1.6215e-07	0.301435
				GO:0006807	nitrogen compound metabolic process	3072	212	158.54	2.3e-08	BP	evm.model.Contig10143.1294;evm.model.Contig10143.230;evm.model.Contig10143.241;evm.model.Contig10143.440;evm.model.Contig10143.590;evm.model.Contig10143.63;evm.model.Contig10143.832;evm.model.Contig10440.76;evm.model.Contig10660.434;evm.model.Contig10660.44;evm.model.Contig10660.444;evm.model.Contig10660.478;evm.model.Contig10660.522;evm.model.Contig10660.590;evm.model.Contig10660.751;evm.model.C…	4.63286e-07	0.338118
				GO:0044237	cellular metabolic process	3355	226	173.14	4.2e-08	BP	evm.model.Contig10143.1294;evm.model.Contig10143.230;evm.model.Contig10143.241;evm.model.Contig10143.290;evm.model.Contig10143.440;evm.model.Contig10143.461;evm.model.Contig10143.590;evm.model.Contig10143.63;evm.model.Contig10143.832;evm.model.Contig10440.76;evm.model.Contig10660.434;evm.model.Contig10660.44;evm.model.Contig10660.444;evm.model.Contig10660.478;evm.model.Contig10660.522;evm.model.C…	7.896e-07	0.360447
				GO:0044238	primary metabolic process	3798	247	196.01	1.2e-07	BP	evm.model.Contig10143.1294;evm.model.Contig10143.230;evm.model.Contig10143.241;evm.model.Contig10143.290;evm.model.Contig10143.390;evm.model.Contig10143.424;evm.model.Contig10143.440;evm.model.Contig10143.590;evm.model.Contig10143.63;evm.model.Contig10143.827;evm.model.Contig10143.832;evm.model.Contig10440.76;evm.model.Contig10660.434;evm.model.Contig10660.44;evm.model.Contig10660.444;evm.model.C…	2.115e-06	0.393939
				GO:0071704	organic substance metabolic process	4058	253	209.43	5e-06	BP	evm.model.Contig10143.1294;evm.model.Contig10143.230;evm.model.Contig10143.241;evm.model.Contig10143.290;evm.model.Contig10143.390;evm.model.Contig10143.424;evm.model.Contig10143.440;evm.model.Contig10143.461;evm.model.Contig10143.590;evm.model.Contig10143.63;evm.model.Contig10143.827;evm.model.Contig10143.832;evm.model.Contig10440.76;evm.model.Contig10660.434;evm.model.Contig10660.44;evm.model.C…	7.05e-05	0.403509
				GO:0009987	cellular process	4336	254	223.77	0.0011	BP	evm.model.Contig10143.1294;evm.model.Contig10143.230;evm.model.Contig10143.241;evm.model.Contig10143.290;evm.model.Contig10143.440;evm.model.Contig10143.461;evm.model.Contig10143.590;evm.model.Contig10143.63;evm.model.Contig10143.832;evm.model.Contig10440.76;evm.model.Contig10660.434;evm.model.Contig10660.44;evm.model.Contig10660.444;evm.model.Contig10660.478;evm.model.Contig10660.522;evm.model.C…	0.013487	0.405104
				GO:0009607	response to biotic stimulus	19	5	0.98	0.0023	BP	evm.model.Contig5252.1064;evm.model.Contig5387.268;evm.model.Contig75.150;evm.model.Contig75.152;evm.model.Contig75.153	0.025944	0.00797448
				GO:0043228	non-membrane-bounded organelle	649	121	46.06	1e-28	CC	evm.model.Contig10143.1294;evm.model.Contig10143.230;evm.model.Contig10143.440;evm.model.Contig10660.434;evm.model.Contig10660.478;evm.model.Contig10660.522;evm.model.Contig10660.590;evm.model.Contig10660.751;evm.model.Contig10660.85;evm.model.Contig11518.17;evm.model.Contig11642.1247;evm.model.Contig11642.1276;evm.model.Contig11642.1510;evm.model.Contig11642.371;evm.model.Contig11642.573;evm.mod…	9.165e-27	0.192982
				GO:0043232	intracellular non-membrane-bounded organelle	649	121	46.06	1e-28	CC	evm.model.Contig10143.1294;evm.model.Contig10143.230;evm.model.Contig10143.440;evm.model.Contig10660.434;evm.model.Contig10660.478;evm.model.Contig10660.522;evm.model.Contig10660.590;evm.model.Contig10660.751;evm.model.Contig10660.85;evm.model.Contig11518.17;evm.model.Contig11642.1247;evm.model.Contig11642.1276;evm.model.Contig11642.1510;evm.model.Contig11642.371;evm.model.Contig11642.573;evm.mod…	9.165e-27	0.192982
				GO:0005737	cytoplasm	943	149	66.92	1.3e-28	CC	evm.model.Contig10143.1174;evm.model.Contig10143.1294;evm.model.Contig10143.1312;evm.model.Contig10143.230;evm.model.Contig10143.440;evm.model.Contig10143.63;evm.model.Contig10143.892;evm.model.Contig10660.226;evm.model.Contig10660.434;evm.model.Contig10660.478;evm.model.Contig10660.522;evm.model.Contig10660.590;evm.model.Contig10660.751;evm.model.Contig10660.85;evm.model.Contig11518.17;evm.model…	9.165e-27	0.23764
				GO:0032991	protein-containing complex	1102	145	78.2	9.9e-19	CC	evm.model.Contig10143.1174;evm.model.Contig10143.1294;evm.model.Contig10143.1312;evm.model.Contig10143.230;evm.model.Contig10143.440;evm.model.Contig10143.832;evm.model.Contig10660.434;evm.model.Contig10660.478;evm.model.Contig10660.522;evm.model.Contig10660.590;evm.model.Contig10660.751;evm.model.Contig10660.85;evm.model.Contig11518.17;evm.model.Contig11642.1247;evm.model.Contig11642.1276;evm.mo…	5.5836e-17	0.23126
				GO:0043226	organelle	1524	165	108.15	4.7e-13	CC	evm.model.Contig10143.1164;evm.model.Contig10143.1174;evm.model.Contig10143.1294;evm.model.Contig10143.1312;evm.model.Contig10143.230;evm.model.Contig10143.440;evm.model.Contig10143.695;evm.model.Contig10143.892;evm.model.Contig10660.226;evm.model.Contig10660.246;evm.model.Contig10660.434;evm.model.Contig10660.478;evm.model.Contig10660.522;evm.model.Contig10660.590;evm.model.Contig10660.745;evm.m…	1.65675e-11	0.263158
				GO:0043229	intracellular organelle	1524	165	108.15	4.7e-13	CC	evm.model.Contig10143.1164;evm.model.Contig10143.1174;evm.model.Contig10143.1294;evm.model.Contig10143.1312;evm.model.Contig10143.230;evm.model.Contig10143.440;evm.model.Contig10143.695;evm.model.Contig10143.892;evm.model.Contig10660.226;evm.model.Contig10660.246;evm.model.Contig10660.434;evm.model.Contig10660.478;evm.model.Contig10660.522;evm.model.Contig10660.590;evm.model.Contig10660.745;evm.m…	1.65675e-11	0.263158
				GO:0044424	intracellular part	2021	188	143.42	9.7e-09	CC	evm.model.Contig10143.1164;evm.model.Contig10143.1174;evm.model.Contig10143.1294;evm.model.Contig10143.1312;evm.model.Contig10143.230;evm.model.Contig10143.440;evm.model.Contig10143.63;evm.model.Contig10143.695;evm.model.Contig10143.832;evm.model.Contig10143.892;evm.model.Contig10660.226;evm.model.Contig10660.246;evm.model.Contig10660.434;evm.model.Contig10660.478;evm.model.Contig10660.522;evm.mo…	2.10415e-07	0.299841
				GO:0005622	intracellular	2241	199	159.03	1.4e-07	CC	evm.model.Contig10143.1164;evm.model.Contig10143.1174;evm.model.Contig10143.1294;evm.model.Contig10143.1312;evm.model.Contig10143.230;evm.model.Contig10143.440;evm.model.Contig10143.63;evm.model.Contig10143.695;evm.model.Contig10143.785;evm.model.Contig10143.832;evm.model.Contig10143.892;evm.model.Contig10660.226;evm.model.Contig10660.246;evm.model.Contig10660.434;evm.model.Contig10660.478;evm.mo…	2.32235e-06	0.317384
				GO:0005623	cell	2336	202	165.77	1.3e-06	CC	evm.model.Contig10143.1164;evm.model.Contig10143.1174;evm.model.Contig10143.1294;evm.model.Contig10143.1312;evm.model.Contig10143.230;evm.model.Contig10143.440;evm.model.Contig10143.63;evm.model.Contig10143.695;evm.model.Contig10143.785;evm.model.Contig10143.832;evm.model.Contig10143.892;evm.model.Contig10660.226;evm.model.Contig10660.246;evm.model.Contig10660.434;evm.model.Contig10660.478;evm.mo…	1.92947e-05	0.322169
				GO:0044464	cell part	2336	202	165.77	1.3e-06	CC	evm.model.Contig10143.1164;evm.model.Contig10143.1174;evm.model.Contig10143.1294;evm.model.Contig10143.1312;evm.model.Contig10143.230;evm.model.Contig10143.440;evm.model.Contig10143.63;evm.model.Contig10143.695;evm.model.Contig10143.785;evm.model.Contig10143.832;evm.model.Contig10143.892;evm.model.Contig10660.226;evm.model.Contig10660.246;evm.model.Contig10660.434;evm.model.Contig10660.478;evm.mo…	1.92947e-05	0.322169
				GO:0044391	ribosomal subunit	36	10	2.55	0.00013	CC	evm.model.Contig11642.982;evm.model.Contig2581.325;evm.model.Contig2581.326;evm.model.Contig2712.1052;evm.model.Contig5252.418;evm.model.Contig5252.448;evm.model.Contig5386.828;evm.model.Contig6055.106;evm.model.Contig9220.633;evm.model.Contig9220.658	0.00166636	0.015949
				GO:0015934	large ribosomal subunit	27	7	1.92	0.00217	CC	evm.model.Contig2581.325;evm.model.Contig2581.326;evm.model.Contig2712.1052;evm.model.Contig5252.448;evm.model.Contig5386.828;evm.model.Contig6055.106;evm.model.Contig9220.633	0.0254975	0.0111643
				GO:0003723	RNA binding	378	35	17.49	7.1e-05	MF	evm.model.Contig10143.241;evm.model.Contig10143.590;evm.model.Contig10660.339;evm.model.Contig11642.1510;evm.model.Contig11642.371;evm.model.Contig11642.748;evm.model.Contig12381.524;evm.model.Contig14326.344;evm.model.Contig14326.528;evm.model.Contig14326.728;evm.model.Contig14326.96;evm.model.Contig2581.325;evm.model.Contig2581.326;evm.model.Contig2581.583;evm.model.Contig2581.859;evm.model.Con…	0.000953429	0.0558214
S3axis,S4axis	green			GO:0050896	response to stimulus	693	57	38.94	0.00192	BP	evm.model.Contig10143.1031;evm.model.Contig10143.271;evm.model.Contig10143.426;evm.model.Contig10143.510;evm.model.Contig10143.548;evm.model.Contig10143.700;evm.model.Contig11518.91;evm.model.Contig11642.1290;evm.model.Contig11642.462;evm.model.Contig11642.768;evm.model.Contig12381.80;evm.model.Contig14326.124;evm.model.Contig14326.286;evm.model.Contig14326.557;evm.model.Contig14326.733;evm.model…	0.00778667	0.0686747
				GO:0006334	nucleosome assembly	64	10	3.6	0.00278	BP	evm.model.Contig12381.158;evm.model.Contig2581.635;evm.model.Contig2685.678;evm.model.Contig2712.1496;evm.model.Contig2712.446;evm.model.Contig2712.665;evm.model.Contig5373.259;evm.model.Contig5386.7;evm.model.Contig5387.493;evm.model.Contig5483.245	0.010681	0.0120482
				GO:0031497	chromatin assembly	64	10	3.6	0.00278	BP	evm.model.Contig12381.158;evm.model.Contig2581.635;evm.model.Contig2685.678;evm.model.Contig2712.1496;evm.model.Contig2712.446;evm.model.Contig2712.665;evm.model.Contig5373.259;evm.model.Contig5386.7;evm.model.Contig5387.493;evm.model.Contig5483.245	0.010681	0.0120482
				GO:0034728	nucleosome organization	64	10	3.6	0.00278	BP	evm.model.Contig12381.158;evm.model.Contig2581.635;evm.model.Contig2685.678;evm.model.Contig2712.1496;evm.model.Contig2712.446;evm.model.Contig2712.665;evm.model.Contig5373.259;evm.model.Contig5386.7;evm.model.Contig5387.493;evm.model.Contig5483.245	0.010681	0.0120482
				GO:0006333	chromatin assembly or disassembly	65	10	3.65	0.00313	BP	evm.model.Contig12381.158;evm.model.Contig2581.635;evm.model.Contig2685.678;evm.model.Contig2712.1496;evm.model.Contig2712.446;evm.model.Contig2712.665;evm.model.Contig5373.259;evm.model.Contig5386.7;evm.model.Contig5387.493;evm.model.Contig5483.245	0.0117778	0.0120482
				GO:0019538	protein metabolic process	2062	141	115.85	0.00348	BP	evm.model.Contig10143.14;evm.model.Contig10143.355;evm.model.Contig10143.393;evm.model.Contig10143.510;evm.model.Contig10143.523;evm.model.Contig10143.577;evm.model.Contig10143.704;evm.model.Contig10143.732;evm.model.Contig10660.111;evm.model.Contig10660.213;evm.model.Contig10660.583;evm.model.Contig10660.95;evm.model.Contig11518.2;evm.model.Contig11518.7;evm.model.Contig11642.1003;evm.model.Cont…	0.0125603	0.16988
				GO:0065004	protein-DNA complex assembly	66	10	3.71	0.00351	BP	evm.model.Contig12381.158;evm.model.Contig2581.635;evm.model.Contig2685.678;evm.model.Contig2712.1496;evm.model.Contig2712.446;evm.model.Contig2712.665;evm.model.Contig5373.259;evm.model.Contig5386.7;evm.model.Contig5387.493;evm.model.Contig5483.245	0.0125603	0.0120482
				GO:0071824	protein-DNA complex subunit organization	66	10	3.71	0.00351	BP	evm.model.Contig12381.158;evm.model.Contig2581.635;evm.model.Contig2685.678;evm.model.Contig2712.1496;evm.model.Contig2712.446;evm.model.Contig2712.665;evm.model.Contig5373.259;evm.model.Contig5386.7;evm.model.Contig5387.493;evm.model.Contig5483.245	0.0125603	0.0120482
				GO:0034622	cellular protein-containing complex assembly	125	15	7.02	0.00421	BP	evm.model.Contig12381.158;evm.model.Contig14326.561;evm.model.Contig2581.635;evm.model.Contig2685.1094;evm.model.Contig2685.678;evm.model.Contig2712.1496;evm.model.Contig2712.446;evm.model.Contig2712.665;evm.model.Contig3230.222;evm.model.Contig5373.259;evm.model.Contig5386.7;evm.model.Contig5387.493;evm.model.Contig5483.245;evm.model.Contig7167.12;evm.model.Contig9220.685	0.0147755	0.0180723
				GO:0006396	RNA processing	154	17	8.65	0.00567	BP	evm.model.Contig10143.664_evm.model.Contig10143.665;evm.model.Contig11518.99;evm.model.Contig2581.245;evm.model.Contig2581.540;evm.model.Contig2581.605;evm.model.Contig2712.1335;evm.model.Contig2712.284;evm.model.Contig2712.503;evm.model.Contig3364.182;evm.model.Contig5252.836;evm.model.Contig5252.951;evm.model.Contig5386.928;evm.model.Contig5483.632_evm.model.Contig5483.633;evm.model.Contig70607…	0.0193416	0.0204819
				GO:0044085	cellular component biogenesis	222	22	12.47	0.00662	BP	evm.model.Contig10660.119;evm.model.Contig11642.1157;evm.model.Contig12381.158;evm.model.Contig14326.561;evm.model.Contig2581.635;evm.model.Contig2685.1094;evm.model.Contig2685.678;evm.model.Contig2712.1335;evm.model.Contig2712.1496;evm.model.Contig2712.446;evm.model.Contig2712.665;evm.model.Contig3230.222;evm.model.Contig5373.259;evm.model.Contig5386.7;evm.model.Contig5387.493;evm.model.Contig54…	0.0221679	0.026506
				GO:0065003	protein-containing complex assembly	137	15	7.7	0.00976	BP	evm.model.Contig12381.158;evm.model.Contig14326.561;evm.model.Contig2581.635;evm.model.Contig2685.1094;evm.model.Contig2685.678;evm.model.Contig2712.1496;evm.model.Contig2712.446;evm.model.Contig2712.665;evm.model.Contig3230.222;evm.model.Contig5373.259;evm.model.Contig5386.7;evm.model.Contig5387.493;evm.model.Contig5483.245;evm.model.Contig7167.12;evm.model.Contig9220.685	0.0312491	0.0180723
				GO:0016567	protein ubiquitination	67	9	3.76	0.01207	BP	evm.model.Contig11642.1279;evm.model.Contig11642.740;evm.model.Contig2581.659;evm.model.Contig2685.849;evm.model.Contig5483.415;evm.model.Contig9867.184;evm.model.Contig9867.300;evm.model.Contig9867.789;evm.model.Contig9868.326	0.0364095	0.0108434
				GO:0007017	microtubule-based process	116	13	6.52	0.01296	BP	evm.model.Contig11642.1403;evm.model.Contig11642.1405;evm.model.Contig11642.147;evm.model.Contig11642.597;evm.model.Contig2712.33;evm.model.Contig3230.222;evm.model.Contig33180.162;evm.model.Contig33180.180;evm.model.Contig5386.1163;evm.model.Contig5386.1279;evm.model.Contig7167.12;evm.model.Contig7167.465;evm.model.Contig9220.685	0.0377547	0.0156627
				GO:0032446	protein modification by small protein conjugation	68	9	3.82	0.01324	BP	evm.model.Contig11642.1279;evm.model.Contig11642.740;evm.model.Contig2581.659;evm.model.Contig2685.849;evm.model.Contig5483.415;evm.model.Contig9867.184;evm.model.Contig9867.300;evm.model.Contig9867.789;evm.model.Contig9868.326	0.0377547	0.0108434
				GO:0070647	protein modification by small protein conjugation or removal	68	9	3.82	0.01324	BP	evm.model.Contig11642.1279;evm.model.Contig11642.740;evm.model.Contig2581.659;evm.model.Contig2685.849;evm.model.Contig5483.415;evm.model.Contig9867.184;evm.model.Contig9867.300;evm.model.Contig9867.789;evm.model.Contig9868.326	0.0377547	0.0108434
				GO:0006511	ubiquitin-dependent protein catabolic process	94	11	5.28	0.01586	BP	evm.model.Contig10143.704;evm.model.Contig11642.1003;evm.model.Contig11642.96;evm.model.Contig12381.557;evm.model.Contig2712.1951;evm.model.Contig2712.2019;evm.model.Contig2800.59;evm.model.Contig33180.430;evm.model.Contig5483.74;evm.model.Contig6055.370;evm.model.Contig8624.205	0.0438553	0.013253
				GO:0019941	modification-dependent protein catabolic process	94	11	5.28	0.01586	BP	evm.model.Contig10143.704;evm.model.Contig11642.1003;evm.model.Contig11642.96;evm.model.Contig12381.557;evm.model.Contig2712.1951;evm.model.Contig2712.2019;evm.model.Contig2800.59;evm.model.Contig33180.430;evm.model.Contig5483.74;evm.model.Contig6055.370;evm.model.Contig8624.205	0.0438553	0.013253
				GO:0043632	modification-dependent macromolecule catabolic process	94	11	5.28	0.01586	BP	evm.model.Contig10143.704;evm.model.Contig11642.1003;evm.model.Contig11642.96;evm.model.Contig12381.557;evm.model.Contig2712.1951;evm.model.Contig2712.2019;evm.model.Contig2800.59;evm.model.Contig33180.430;evm.model.Contig5483.74;evm.model.Contig6055.370;evm.model.Contig8624.205	0.0438553	0.013253
				GO:0007049	cell cycle	59	8	3.31	0.01659	BP	evm.model.Contig10660.530;evm.model.Contig2712.1185;evm.model.Contig2712.1507;evm.model.Contig5483.888;evm.model.Contig64.71;evm.model.Contig7167.465;evm.model.Contig9867.20;evm.model.Contig9868.717	0.0451892	0.00963855
				GO:0006468	protein phosphorylation	865	63	48.6	0.01715	BP	evm.model.Contig10143.355;evm.model.Contig10143.510;evm.model.Contig10143.577;evm.model.Contig10660.111;evm.model.Contig10660.583;evm.model.Contig11518.2;evm.model.Contig11642.1204;evm.model.Contig11642.1321;evm.model.Contig11642.1733;evm.model.Contig14326.223;evm.model.Contig14326.232;evm.model.Contig14326.394;evm.model.Contig16184.59_evm.model.Contig16184.60;evm.model.Contig2581.198;evm.model.C…	0.0463685	0.0759036
				GO:0022402	cell cycle process	28	5	1.57	0.0184	BP	evm.model.Contig10660.530;evm.model.Contig2712.1185;evm.model.Contig7167.465;evm.model.Contig9867.20;evm.model.Contig9868.717	0.0493823	0.0060241
				GO:0005634	nucleus	708	93	46.93	1.1e-12	CC	evm.model.Contig10143.1008;evm.model.Contig10143.1020;evm.model.Contig10143.1045;evm.model.Contig10143.1188;evm.model.Contig10143.131;evm.model.Contig10143.281;evm.model.Contig10143.426;evm.model.Contig10143.548;evm.model.Contig10440.2;evm.model.Contig10440.21;evm.model.Contig10440.70;evm.model.Contig10660.119;evm.model.Contig10660.175;evm.model.Contig10660.51;evm.model.Contig10660.572;evm.model.…	6.69167e-11	0.112048
				GO:0044424	intracellular part	2021	181	133.96	4.1e-10	CC	evm.model.Contig10143.1008;evm.model.Contig10143.1020;evm.model.Contig10143.1045;evm.model.Contig10143.1188;evm.model.Contig10143.1231;evm.model.Contig10143.131;evm.model.Contig10143.281;evm.model.Contig10143.426;evm.model.Contig10143.523;evm.model.Contig10143.548;evm.model.Contig10440.2;evm.model.Contig10440.21;evm.model.Contig10440.70;evm.model.Contig10660.119;evm.model.Contig10660.175;evm.mode…	7.87632e-09	0.218072
				GO:0005622	intracellular	2241	193	148.55	1.4e-09	CC	evm.model.Contig10143.1008;evm.model.Contig10143.1020;evm.model.Contig10143.1045;evm.model.Contig10143.1188;evm.model.Contig10143.1231;evm.model.Contig10143.131;evm.model.Contig10143.14;evm.model.Contig10143.271;evm.model.Contig10143.281;evm.model.Contig10143.426;evm.model.Contig10143.523;evm.model.Contig10143.548;evm.model.Contig10440.2;evm.model.Contig10440.21;evm.model.Contig10440.70;evm.model…	2.32273e-08	0.23253
				GO:0005623	cell	2336	198	154.84	2.3e-09	CC	evm.model.Contig10143.1008;evm.model.Contig10143.1020;evm.model.Contig10143.1045;evm.model.Contig10143.1188;evm.model.Contig10143.1231;evm.model.Contig10143.131;evm.model.Contig10143.14;evm.model.Contig10143.271;evm.model.Contig10143.281;evm.model.Contig10143.426;evm.model.Contig10143.523;evm.model.Contig10143.548;evm.model.Contig10143.55;evm.model.Contig10440.2;evm.model.Contig10440.21;evm.model…	3.49792e-08	0.238554
				GO:0044464	cell part	2336	198	154.84	2.3e-09	CC	evm.model.Contig10143.1008;evm.model.Contig10143.1020;evm.model.Contig10143.1045;evm.model.Contig10143.1188;evm.model.Contig10143.1231;evm.model.Contig10143.131;evm.model.Contig10143.14;evm.model.Contig10143.271;evm.model.Contig10143.281;evm.model.Contig10143.426;evm.model.Contig10143.523;evm.model.Contig10143.548;evm.model.Contig10143.55;evm.model.Contig10440.2;evm.model.Contig10440.21;evm.model…	3.49792e-08	0.238554
				GO:0043227	membrane-bounded organelle	959	105	63.57	2.6e-09	CC	evm.model.Contig10143.1008;evm.model.Contig10143.1020;evm.model.Contig10143.1045;evm.model.Contig10143.1188;evm.model.Contig10143.1231;evm.model.Contig10143.131;evm.model.Contig10143.281;evm.model.Contig10143.426;evm.model.Contig10143.548;evm.model.Contig10440.2;evm.model.Contig10440.21;evm.model.Contig10440.70;evm.model.Contig10660.119;evm.model.Contig10660.175;evm.model.Contig10660.51;evm.model…	3.796e-08	0.126506
				GO:0043226	organelle	1524	146	101.02	3e-09	CC	evm.model.Contig10143.1008;evm.model.Contig10143.1020;evm.model.Contig10143.1045;evm.model.Contig10143.1188;evm.model.Contig10143.1231;evm.model.Contig10143.131;evm.model.Contig10143.281;evm.model.Contig10143.426;evm.model.Contig10143.548;evm.model.Contig10440.2;evm.model.Contig10440.21;evm.model.Contig10440.70;evm.model.Contig10660.119;evm.model.Contig10660.175;evm.model.Contig10660.51;evm.model…	4.05556e-08	0.175904
				GO:0043229	intracellular organelle	1524	146	101.02	3e-09	CC	evm.model.Contig10143.1008;evm.model.Contig10143.1020;evm.model.Contig10143.1045;evm.model.Contig10143.1188;evm.model.Contig10143.1231;evm.model.Contig10143.131;evm.model.Contig10143.281;evm.model.Contig10143.426;evm.model.Contig10143.548;evm.model.Contig10440.2;evm.model.Contig10440.21;evm.model.Contig10440.70;evm.model.Contig10660.119;evm.model.Contig10660.175;evm.model.Contig10660.51;evm.model…	4.05556e-08	0.175904
				GO:0043231	intracellular membrane-bounded organelle	946	103	62.71	5.9e-09	CC	evm.model.Contig10143.1008;evm.model.Contig10143.1020;evm.model.Contig10143.1045;evm.model.Contig10143.1188;evm.model.Contig10143.1231;evm.model.Contig10143.131;evm.model.Contig10143.281;evm.model.Contig10143.426;evm.model.Contig10143.548;evm.model.Contig10440.2;evm.model.Contig10440.21;evm.model.Contig10440.70;evm.model.Contig10660.119;evm.model.Contig10660.175;evm.model.Contig10660.51;evm.model…	7.42167e-08	0.124096
				GO:0005694	chromosome	100	23	6.63	7.2e-08	CC	evm.model.Contig10660.51;evm.model.Contig12381.158;evm.model.Contig2581.418;evm.model.Contig2581.635;evm.model.Contig2581.903;evm.model.Contig2685.678;evm.model.Contig2712.1185;evm.model.Contig2712.1496;evm.model.Contig2712.1507;evm.model.Contig2712.446;evm.model.Contig2712.665;evm.model.Contig33180.129;evm.model.Contig5252.1125;evm.model.Contig5373.259;evm.model.Contig5386.7;evm.model.Contig5387…	7.96364e-07	0.0277108
				GO:0000793	condensed chromosome	10	7	0.66	5.2e-07	CC	evm.model.Contig2581.418;evm.model.Contig2712.1185;evm.model.Contig2712.1507;evm.model.Contig5483.888;evm.model.Contig7167.302;evm.model.Contig8624.743;evm.model.Contig9868.717	5.42286e-06	0.00843373
				GO:0044427	chromosomal part	83	18	5.5	5e-06	CC	evm.model.Contig12381.158;evm.model.Contig2581.418;evm.model.Contig2581.635;evm.model.Contig2685.678;evm.model.Contig2712.1185;evm.model.Contig2712.1496;evm.model.Contig2712.1507;evm.model.Contig2712.446;evm.model.Contig2712.665;evm.model.Contig5252.1125;evm.model.Contig5373.259;evm.model.Contig5386.7;evm.model.Contig5387.493;evm.model.Contig5483.245;evm.model.Contig5483.888;evm.model.Contig7167.…	4.67949e-05	0.0216867
				GO:0044422	organelle part	572	59	37.92	0.00019	CC	evm.model.Contig10143.1045;evm.model.Contig10143.1231;evm.model.Contig10143.548;evm.model.Contig10660.119;evm.model.Contig10660.51;evm.model.Contig11642.1403;evm.model.Contig11642.1405;evm.model.Contig11642.147;evm.model.Contig11642.597;evm.model.Contig12381.158;evm.model.Contig12381.96;evm.model.Contig14326.561;evm.model.Contig2581.418;evm.model.Contig2581.635;evm.model.Contig2581.705;evm.model.…	0.00103508	0.0710843
				GO:0044446	intracellular organelle part	572	59	37.92	0.00019	CC	evm.model.Contig10143.1045;evm.model.Contig10143.1231;evm.model.Contig10143.548;evm.model.Contig10660.119;evm.model.Contig10660.51;evm.model.Contig11642.1403;evm.model.Contig11642.1405;evm.model.Contig11642.147;evm.model.Contig11642.597;evm.model.Contig12381.158;evm.model.Contig12381.96;evm.model.Contig14326.561;evm.model.Contig2581.418;evm.model.Contig2581.635;evm.model.Contig2581.705;evm.model.…	0.00103508	0.0710843
				GO:0044815	DNA packaging complex	61	12	4.04	0.00052	CC	evm.model.Contig12381.158;evm.model.Contig2581.635;evm.model.Contig2685.678;evm.model.Contig2712.1185;evm.model.Contig2712.1496;evm.model.Contig2712.446;evm.model.Contig2712.665;evm.model.Contig5373.259;evm.model.Contig5386.7;evm.model.Contig5387.493;evm.model.Contig5483.245;evm.model.Contig9868.717	0.00249737	0.0144578
				GO:1990234	transferase complex	143	20	9.48	0.001	CC	evm.model.Contig10143.1045;evm.model.Contig10143.55;evm.model.Contig11642.1279;evm.model.Contig11642.740;evm.model.Contig12381.96;evm.model.Contig2581.418;evm.model.Contig2581.659;evm.model.Contig2581.705;evm.model.Contig2685.849;evm.model.Contig5252.324;evm.model.Contig5483.415;evm.model.Contig6055.370;evm.model.Contig6055.419;evm.model.Contig7167.302;evm.model.Contig8624.743;evm.model.Contig922…	0.00445122	0.0240964
				GO:0000786	nucleosome	59	10	3.91	0.00477	CC	evm.model.Contig12381.158;evm.model.Contig2581.635;evm.model.Contig2685.678;evm.model.Contig2712.1496;evm.model.Contig2712.446;evm.model.Contig2712.665;evm.model.Contig5373.259;evm.model.Contig5386.7;evm.model.Contig5387.493;evm.model.Contig5483.245	0.016425	0.0120482
				GO:0032993	protein-DNA complex	59	10	3.91	0.00477	CC	evm.model.Contig12381.158;evm.model.Contig2581.635;evm.model.Contig2685.678;evm.model.Contig2712.1496;evm.model.Contig2712.446;evm.model.Contig2712.665;evm.model.Contig5373.259;evm.model.Contig5386.7;evm.model.Contig5387.493;evm.model.Contig5483.245	0.016425	0.0120482
				GO:0044428	nuclear part	133	17	8.82	0.00615	CC	evm.model.Contig10143.1045;evm.model.Contig10143.548;evm.model.Contig10660.119;evm.model.Contig10660.51;evm.model.Contig2581.705;evm.model.Contig2685.91;evm.model.Contig2712.1507;evm.model.Contig3098.95;evm.model.Contig5252.1125;evm.model.Contig5386.116;evm.model.Contig5387.273;evm.model.Contig5483.888;evm.model.Contig6055.419;evm.model.Contig7167.360;evm.model.Contig7167.379;evm.model.Contig9220…	0.0207847	0.0204819
				GO:0005667	transcription factor complex	36	7	2.39	0.0082	CC	evm.model.Contig10143.1045;evm.model.Contig10143.548;evm.model.Contig10660.191;evm.model.Contig11642.527;evm.model.Contig186471.1;evm.model.Contig2581.705;evm.model.Contig9220.530	0.0267232	0.00843373
				GO:0000785	chromatin	66	10	4.37	0.01065	CC	evm.model.Contig12381.158;evm.model.Contig2581.635;evm.model.Contig2685.678;evm.model.Contig2712.1496;evm.model.Contig2712.446;evm.model.Contig2712.665;evm.model.Contig5373.259;evm.model.Contig5386.7;evm.model.Contig5387.493;evm.model.Contig5483.245	0.0335108	0.0120482
				GO:0043228	non-membrane-bounded organelle	649	57	43.02	0.01163	CC	evm.model.Contig10660.119;evm.model.Contig10660.51;evm.model.Contig10660.95;evm.model.Contig11642.1403;evm.model.Contig11642.1405;evm.model.Contig11642.147;evm.model.Contig11642.597;evm.model.Contig11642.792;evm.model.Contig12381.158;evm.model.Contig12381.333;evm.model.Contig14326.561;evm.model.Contig2581.146;evm.model.Contig2581.418;evm.model.Contig2581.635;evm.model.Contig2581.903;evm.model.Con…	0.0353746	0.0686747
				GO:0043232	intracellular non-membrane-bounded organelle	649	57	43.02	0.01163	CC	evm.model.Contig10660.119;evm.model.Contig10660.51;evm.model.Contig10660.95;evm.model.Contig11642.1403;evm.model.Contig11642.1405;evm.model.Contig11642.147;evm.model.Contig11642.597;evm.model.Contig11642.792;evm.model.Contig12381.158;evm.model.Contig12381.333;evm.model.Contig14326.561;evm.model.Contig2581.146;evm.model.Contig2581.418;evm.model.Contig2581.635;evm.model.Contig2581.903;evm.model.Con…	0.0353746	0.0686747
				GO:0031974	membrane-enclosed lumen	78	11	5.17	0.0128	CC	evm.model.Contig10143.1045;evm.model.Contig10660.119;evm.model.Contig10660.51;evm.model.Contig2581.705;evm.model.Contig2685.684;evm.model.Contig2712.1507;evm.model.Contig5252.1125;evm.model.Contig5483.888;evm.model.Contig6055.419;evm.model.Contig9220.530;evm.model.Contig9867.856	0.0376774	0.013253
				GO:0043233	organelle lumen	78	11	5.17	0.0128	CC	evm.model.Contig10143.1045;evm.model.Contig10660.119;evm.model.Contig10660.51;evm.model.Contig2581.705;evm.model.Contig2685.684;evm.model.Contig2712.1507;evm.model.Contig5252.1125;evm.model.Contig5483.888;evm.model.Contig6055.419;evm.model.Contig9220.530;evm.model.Contig9867.856	0.0376774	0.013253
				GO:0070013	intracellular organelle lumen	78	11	5.17	0.0128	CC	evm.model.Contig10143.1045;evm.model.Contig10660.119;evm.model.Contig10660.51;evm.model.Contig2581.705;evm.model.Contig2685.684;evm.model.Contig2712.1507;evm.model.Contig5252.1125;evm.model.Contig5483.888;evm.model.Contig6055.419;evm.model.Contig9220.530;evm.model.Contig9867.856	0.0376774	0.013253
				GO:0031981	nuclear lumen	68	10	4.51	0.01306	CC	evm.model.Contig10143.1045;evm.model.Contig10660.119;evm.model.Contig10660.51;evm.model.Contig2581.705;evm.model.Contig2712.1507;evm.model.Contig5252.1125;evm.model.Contig5483.888;evm.model.Contig6055.419;evm.model.Contig9220.530;evm.model.Contig9867.856	0.0377547	0.0120482
				GO:0032991	protein-containing complex	1102	89	73.05	0.01445	CC	evm.model.Contig10143.1045;evm.model.Contig10143.523;evm.model.Contig10143.548;evm.model.Contig10143.55;evm.model.Contig10660.191;evm.model.Contig10660.316;evm.model.Contig10660.95;evm.model.Contig11642.1279;evm.model.Contig11642.1403;evm.model.Contig11642.1405;evm.model.Contig11642.147;evm.model.Contig11642.527;evm.model.Contig11642.597;evm.model.Contig11642.740;evm.model.Contig11642.792;evm.mod…	0.0408857	0.107229
				GO:0003676	nucleic acid binding	1807	193	112.11	1e-15	MF	evm.model.Contig10143.1020;evm.model.Contig10143.1049;evm.model.Contig10143.1183;evm.model.Contig10143.1188;evm.model.Contig10143.131;evm.model.Contig10143.426;evm.model.Contig10440.2;evm.model.Contig10440.20;evm.model.Contig10440.50;evm.model.Contig10660.175;evm.model.Contig10660.269;evm.model.Contig10660.427;evm.model.Contig10660.572;evm.model.Contig11518.13;evm.model.Contig11518.56;evm.model.C…	1.21667e-13	0.23253
				GO:1901363	heterocyclic compound binding	4164	339	258.34	1.4e-10	MF	evm.model.Contig10143.1008;evm.model.Contig10143.1020;evm.model.Contig10143.1049;evm.model.Contig10143.1183;evm.model.Contig10143.1188;evm.model.Contig10143.131;evm.model.Contig10143.170;evm.model.Contig10143.271;evm.model.Contig10143.355;evm.model.Contig10143.398;evm.model.Contig10143.426;evm.model.Contig10143.510;evm.model.Contig10143.526;evm.model.Contig10143.577;evm.model.Contig10143.732;evm.…	3.65e-09	0.408434
				GO:0097159	organic cyclic compound binding	4166	339	258.47	1.5e-10	MF	evm.model.Contig10143.1008;evm.model.Contig10143.1020;evm.model.Contig10143.1049;evm.model.Contig10143.1183;evm.model.Contig10143.1188;evm.model.Contig10143.131;evm.model.Contig10143.170;evm.model.Contig10143.271;evm.model.Contig10143.355;evm.model.Contig10143.398;evm.model.Contig10143.426;evm.model.Contig10143.510;evm.model.Contig10143.526;evm.model.Contig10143.577;evm.model.Contig10143.732;evm.…	3.65e-09	0.408434
				GO:0005488	binding	8032	570	498.32	7.4e-10	MF	evm.model.Contig10143.1008;evm.model.Contig10143.1011;evm.model.Contig10143.1017;evm.model.Contig10143.1020;evm.model.Contig10143.1036;evm.model.Contig10143.1049;evm.model.Contig10143.1183;evm.model.Contig10143.1188;evm.model.Contig10143.131;evm.model.Contig10143.170;evm.model.Contig10143.216;evm.model.Contig10143.271;evm.model.Contig10143.34;evm.model.Contig10143.355;evm.model.Contig10143.395;ev…	1.3505e-08	0.686747
				GO:0003677	DNA binding	1022	112	63.41	9.3e-10	MF	evm.model.Contig10143.1020;evm.model.Contig10143.1049;evm.model.Contig10143.1183;evm.model.Contig10143.1188;evm.model.Contig10143.131;evm.model.Contig10143.426;evm.model.Contig10440.2;evm.model.Contig10660.175;evm.model.Contig10660.572;evm.model.Contig11518.56;evm.model.Contig11518.7;evm.model.Contig11642.1028;evm.model.Contig11642.1290;evm.model.Contig11642.451;evm.model.Contig11642.468;evm.mode…	1.61643e-08	0.13494
				GO:0140097	catalytic activity, acting on DNA	85	22	5.27	6.1e-09	MF	evm.model.Contig11642.768;evm.model.Contig2581.342;evm.model.Contig2581.903;evm.model.Contig2685.91;evm.model.Contig2685.953;evm.model.Contig2712.1006;evm.model.Contig2712.2033;evm.model.Contig2712.2034;evm.model.Contig2712.284;evm.model.Contig3098.167;evm.model.Contig3098.82;evm.model.Contig3230.229;evm.model.Contig5373.542;evm.model.Contig5373.594;evm.model.Contig5387.355;evm.model.Contig6055.1…	7.42167e-08	0.026506
				GO:0005524	ATP binding	1685	149	104.54	2.2e-06	MF	evm.model.Contig10143.1008;evm.model.Contig10143.170;evm.model.Contig10143.355;evm.model.Contig10143.398;evm.model.Contig10143.426;evm.model.Contig10143.510;evm.model.Contig10143.526;evm.model.Contig10143.577;evm.model.Contig10143.732;evm.model.Contig10440.21;evm.model.Contig10660.111;evm.model.Contig10660.33;evm.model.Contig10660.572;evm.model.Contig10660.583;evm.model.Contig11518.2;evm.model.Co…	2.11316e-05	0.179518
				GO:0032559	adenyl ribonucleotide binding	1725	150	107.02	5.4e-06	MF	evm.model.Contig10143.1008;evm.model.Contig10143.170;evm.model.Contig10143.355;evm.model.Contig10143.398;evm.model.Contig10143.426;evm.model.Contig10143.510;evm.model.Contig10143.526;evm.model.Contig10143.577;evm.model.Contig10143.732;evm.model.Contig10440.21;evm.model.Contig10660.111;evm.model.Contig10660.33;evm.model.Contig10660.572;evm.model.Contig10660.583;evm.model.Contig11518.2;evm.model.Co…	4.9275e-05	0.180723
				GO:0008144	drug binding	1769	153	109.75	5.7e-06	MF	evm.model.Contig10143.1008;evm.model.Contig10143.170;evm.model.Contig10143.355;evm.model.Contig10143.398;evm.model.Contig10143.426;evm.model.Contig10143.510;evm.model.Contig10143.526;evm.model.Contig10143.577;evm.model.Contig10143.732;evm.model.Contig10440.21;evm.model.Contig10660.111;evm.model.Contig10660.33;evm.model.Contig10660.572;evm.model.Contig10660.583;evm.model.Contig11518.2;evm.model.Co…	5.07439e-05	0.184337
				GO:0035639	purine ribonucleoside triphosphate binding	1918	163	119	7.3e-06	MF	evm.model.Contig10143.1008;evm.model.Contig10143.170;evm.model.Contig10143.271;evm.model.Contig10143.355;evm.model.Contig10143.398;evm.model.Contig10143.426;evm.model.Contig10143.510;evm.model.Contig10143.526;evm.model.Contig10143.577;evm.model.Contig10143.732;evm.model.Contig10440.21;evm.model.Contig10660.111;evm.model.Contig10660.33;evm.model.Contig10660.572;evm.model.Contig10660.583;evm.model.…	6.34405e-05	0.196386
				GO:0003887	DNA-directed DNA polymerase activity	19	8	1.18	8.6e-06	MF	evm.model.Contig11642.768;evm.model.Contig2712.1006;evm.model.Contig5373.542;evm.model.Contig5373.594;evm.model.Contig5387.355;evm.model.Contig6055.133;evm.model.Contig8573.220;evm.model.Contig9220.704	7.3e-05	0.00963855
				GO:0030554	adenyl nucleotide binding	1764	151	109.44	1.2e-05	MF	evm.model.Contig10143.1008;evm.model.Contig10143.170;evm.model.Contig10143.355;evm.model.Contig10143.398;evm.model.Contig10143.426;evm.model.Contig10143.510;evm.model.Contig10143.526;evm.model.Contig10143.577;evm.model.Contig10143.732;evm.model.Contig10440.21;evm.model.Contig10660.111;evm.model.Contig10660.33;evm.model.Contig10660.572;evm.model.Contig10660.583;evm.model.Contig11518.2;evm.model.Co…	9.95455e-05	0.181928
				GO:0034061	DNA polymerase activity	26	9	1.61	1.6e-05	MF	evm.model.Contig11642.768;evm.model.Contig2712.1006;evm.model.Contig2712.284;evm.model.Contig5373.542;evm.model.Contig5373.594;evm.model.Contig5387.355;evm.model.Contig6055.133;evm.model.Contig8573.220;evm.model.Contig9220.704	0.000126956	0.0108434
				GO:0032555	purine ribonucleotide binding	1958	164	121.48	1.6e-05	MF	evm.model.Contig10143.1008;evm.model.Contig10143.170;evm.model.Contig10143.271;evm.model.Contig10143.355;evm.model.Contig10143.398;evm.model.Contig10143.426;evm.model.Contig10143.510;evm.model.Contig10143.526;evm.model.Contig10143.577;evm.model.Contig10143.732;evm.model.Contig10440.21;evm.model.Contig10660.111;evm.model.Contig10660.33;evm.model.Contig10660.572;evm.model.Contig10660.583;evm.model.…	0.000126956	0.19759
				GO:0017111	nucleoside-triphosphatase activity	738	74	45.79	2.3e-05	MF	evm.model.Contig10143.170;evm.model.Contig10143.271;evm.model.Contig10143.398;evm.model.Contig10143.526;evm.model.Contig10143.66;evm.model.Contig10660.33;evm.model.Contig10660.572;evm.model.Contig11518.81;evm.model.Contig11642.1403;evm.model.Contig11642.1405;evm.model.Contig11642.147;evm.model.Contig11642.597;evm.model.Contig12381.491;evm.model.Contig2581.199;evm.model.Contig2581.342;evm.model.Co…	0.000178617	0.0891566
				GO:0016462	pyrophosphatase activity	754	75	46.78	2.6e-05	MF	evm.model.Contig10143.170;evm.model.Contig10143.271;evm.model.Contig10143.398;evm.model.Contig10143.526;evm.model.Contig10143.66;evm.model.Contig10660.33;evm.model.Contig10660.572;evm.model.Contig11518.81;evm.model.Contig11642.1403;evm.model.Contig11642.1405;evm.model.Contig11642.147;evm.model.Contig11642.597;evm.model.Contig12381.491;evm.model.Contig2581.199;evm.model.Contig2581.342;evm.model.Co…	0.000197708	0.0903614
				GO:0008094	DNA-dependent ATPase activity	34	10	2.11	2.7e-05	MF	evm.model.Contig2581.342;evm.model.Contig2581.903;evm.model.Contig2685.91;evm.model.Contig2712.2033;evm.model.Contig2712.2034;evm.model.Contig3098.167;evm.model.Contig5373.275;evm.model.Contig5483.506;evm.model.Contig7167.472;evm.model.Contig8624.670	0.000201122	0.0120482
				GO:0016817	hydrolase activity, acting on acid anhydrides	756	75	46.9	2.9e-05	MF	evm.model.Contig10143.170;evm.model.Contig10143.271;evm.model.Contig10143.398;evm.model.Contig10143.526;evm.model.Contig10143.66;evm.model.Contig10660.33;evm.model.Contig10660.572;evm.model.Contig11518.81;evm.model.Contig11642.1403;evm.model.Contig11642.1405;evm.model.Contig11642.147;evm.model.Contig11642.597;evm.model.Contig12381.491;evm.model.Contig2581.199;evm.model.Contig2581.342;evm.model.Co…	0.000203558	0.0903614
				GO:0016818	hydrolase activity, acting on acid anhydrides, in phosphorus-containing anhydrides	756	75	46.9	2.9e-05	MF	evm.model.Contig10143.170;evm.model.Contig10143.271;evm.model.Contig10143.398;evm.model.Contig10143.526;evm.model.Contig10143.66;evm.model.Contig10660.33;evm.model.Contig10660.572;evm.model.Contig11518.81;evm.model.Contig11642.1403;evm.model.Contig11642.1405;evm.model.Contig11642.147;evm.model.Contig11642.597;evm.model.Contig12381.491;evm.model.Contig2581.199;evm.model.Contig2581.342;evm.model.Co…	0.000203558	0.0903614
				GO:0016779	nucleotidyltransferase activity	126	21	7.82	2.9e-05	MF	evm.model.Contig10143.131;evm.model.Contig11518.99;evm.model.Contig11642.768;evm.model.Contig14326.148;evm.model.Contig2685.1065;evm.model.Contig2712.1006;evm.model.Contig2712.284;evm.model.Contig3098.244;evm.model.Contig5373.542;evm.model.Contig5373.594;evm.model.Contig5387.355;evm.model.Contig5482.144;evm.model.Contig5483.419;evm.model.Contig6055.133;evm.model.Contig6055.457;evm.model.Contig605…	0.000203558	0.0253012
				GO:0032553	ribonucleotide binding	1984	164	123.09	3.3e-05	MF	evm.model.Contig10143.1008;evm.model.Contig10143.170;evm.model.Contig10143.271;evm.model.Contig10143.355;evm.model.Contig10143.398;evm.model.Contig10143.426;evm.model.Contig10143.510;evm.model.Contig10143.526;evm.model.Contig10143.577;evm.model.Contig10143.732;evm.model.Contig10440.21;evm.model.Contig10660.111;evm.model.Contig10660.33;evm.model.Contig10660.572;evm.model.Contig10660.583;evm.model.…	0.000227264	0.19759
				GO:0097367	carbohydrate derivative binding	2002	165	124.21	3.7e-05	MF	evm.model.Contig10143.1008;evm.model.Contig10143.170;evm.model.Contig10143.271;evm.model.Contig10143.355;evm.model.Contig10143.398;evm.model.Contig10143.426;evm.model.Contig10143.510;evm.model.Contig10143.526;evm.model.Contig10143.577;evm.model.Contig10143.732;evm.model.Contig10440.21;evm.model.Contig10660.111;evm.model.Contig10660.33;evm.model.Contig10660.572;evm.model.Contig10660.583;evm.model.…	0.000245546	0.198795
				GO:0017076	purine nucleotide binding	2004	165	124.33	3.9e-05	MF	evm.model.Contig10143.1008;evm.model.Contig10143.170;evm.model.Contig10143.271;evm.model.Contig10143.355;evm.model.Contig10143.398;evm.model.Contig10143.426;evm.model.Contig10143.510;evm.model.Contig10143.526;evm.model.Contig10143.577;evm.model.Contig10143.732;evm.model.Contig10440.21;evm.model.Contig10660.111;evm.model.Contig10660.33;evm.model.Contig10660.572;evm.model.Contig10660.583;evm.model.…	0.000254196	0.198795
				GO:0042623	ATPase activity, coupled	194	26	12.04	0.00016	MF	evm.model.Contig11518.81;evm.model.Contig2581.342;evm.model.Contig2581.903;evm.model.Contig2685.1241;evm.model.Contig2685.443;evm.model.Contig2685.91;evm.model.Contig2712.2033;evm.model.Contig2712.2034;evm.model.Contig2712.769_evm.model.Contig2712.770;evm.model.Contig3098.167;evm.model.Contig3098.317;evm.model.Contig3364.157;evm.model.Contig5373.168;evm.model.Contig5373.275;evm.model.Contig5386.1…	0.0009125	0.0313253
				GO:0008026	ATP-dependent helicase activity	102	17	6.33	0.00016	MF	evm.model.Contig11518.81;evm.model.Contig2581.342;evm.model.Contig2685.1241;evm.model.Contig2685.443;evm.model.Contig2685.91;evm.model.Contig2712.769_evm.model.Contig2712.770;evm.model.Contig3098.167;evm.model.Contig3364.157;evm.model.Contig5373.168;evm.model.Contig5386.1249;evm.model.Contig5386.928;evm.model.Contig5482.20;evm.model.Contig5483.632_evm.model.Contig5483.633;evm.model.Contig8573.221…	0.0009125	0.0204819
				GO:0070035	purine NTP-dependent helicase activity	102	17	6.33	0.00016	MF	evm.model.Contig11518.81;evm.model.Contig2581.342;evm.model.Contig2685.1241;evm.model.Contig2685.443;evm.model.Contig2685.91;evm.model.Contig2712.769_evm.model.Contig2712.770;evm.model.Contig3098.167;evm.model.Contig3364.157;evm.model.Contig5373.168;evm.model.Contig5386.1249;evm.model.Contig5386.928;evm.model.Contig5482.20;evm.model.Contig5483.632_evm.model.Contig5483.633;evm.model.Contig8573.221…	0.0009125	0.0204819
				GO:0043168	anion binding	2270	179	140.84	0.00019	MF	evm.model.Contig10143.1008;evm.model.Contig10143.170;evm.model.Contig10143.271;evm.model.Contig10143.355;evm.model.Contig10143.398;evm.model.Contig10143.426;evm.model.Contig10143.510;evm.model.Contig10143.526;evm.model.Contig10143.577;evm.model.Contig10143.700;evm.model.Contig10143.732;evm.model.Contig10440.21;evm.model.Contig10660.111;evm.model.Contig10660.33;evm.model.Contig10660.572;evm.model.…	0.00103508	0.215663
				GO:0008276	protein methyltransferase activity	22	7	1.36	0.00026	MF	evm.model.Contig12381.67;evm.model.Contig15511.2;evm.model.Contig2800.141;evm.model.Contig5482.169_evm.model.Contig5482.170;evm.model.Contig5483.178;evm.model.Contig6055.467;evm.model.Contig8573.431	0.00139559	0.00843373
				GO:0000166	nucleotide binding	2250	176	139.59	0.00033	MF	evm.model.Contig10143.1008;evm.model.Contig10143.170;evm.model.Contig10143.271;evm.model.Contig10143.355;evm.model.Contig10143.398;evm.model.Contig10143.426;evm.model.Contig10143.510;evm.model.Contig10143.526;evm.model.Contig10143.577;evm.model.Contig10143.732;evm.model.Contig10440.21;evm.model.Contig10660.111;evm.model.Contig10660.33;evm.model.Contig10660.572;evm.model.Contig10660.583;evm.model.…	0.00172071	0.212048
				GO:1901265	nucleoside phosphate binding	2250	176	139.59	0.00033	MF	evm.model.Contig10143.1008;evm.model.Contig10143.170;evm.model.Contig10143.271;evm.model.Contig10143.355;evm.model.Contig10143.398;evm.model.Contig10143.426;evm.model.Contig10143.510;evm.model.Contig10143.526;evm.model.Contig10143.577;evm.model.Contig10143.732;evm.model.Contig10440.21;evm.model.Contig10660.111;evm.model.Contig10660.33;evm.model.Contig10660.572;evm.model.Contig10660.583;evm.model.…	0.00172071	0.212048
				GO:0004386	helicase activity	161	22	9.99	0.00039	MF	evm.model.Contig10143.66;evm.model.Contig10660.572;evm.model.Contig11518.81;evm.model.Contig2581.342;evm.model.Contig2685.1241;evm.model.Contig2685.360;evm.model.Contig2685.443;evm.model.Contig2685.91;evm.model.Contig2712.769_evm.model.Contig2712.770;evm.model.Contig3098.167;evm.model.Contig3364.157;evm.model.Contig5373.168;evm.model.Contig5386.1249;evm.model.Contig5386.242;evm.model.Contig5386.9…	0.00200493	0.026506
				GO:0004518	nuclease activity	92	15	5.71	0.0005	MF	evm.model.Contig11642.462;evm.model.Contig12381.494;evm.model.Contig14326.124;evm.model.Contig2581.605;evm.model.Contig2712.1550;evm.model.Contig2712.2033;evm.model.Contig2712.2034;evm.model.Contig3364.182;evm.model.Contig5386.101;evm.model.Contig5386.44;evm.model.Contig5386.928;evm.model.Contig5483.632_evm.model.Contig5483.633;evm.model.Contig75.305;evm.model.Contig9220.925;evm.model.Contig9868.…	0.00246622	0.0180723
				GO:0030983	mismatched DNA binding	13	5	0.81	0.00077	MF	evm.model.Contig10143.426;evm.model.Contig11642.1290;evm.model.Contig14326.733;evm.model.Contig33180.312;evm.model.Contig5387.153	0.00351313	0.0060241
				GO:0036094	small molecule binding	2380	182	147.66	0.00081	MF	evm.model.Contig10143.1008;evm.model.Contig10143.170;evm.model.Contig10143.271;evm.model.Contig10143.355;evm.model.Contig10143.398;evm.model.Contig10143.426;evm.model.Contig10143.510;evm.model.Contig10143.526;evm.model.Contig10143.577;evm.model.Contig10143.732;evm.model.Contig10440.21;evm.model.Contig10660.111;evm.model.Contig10660.33;evm.model.Contig10660.572;evm.model.Contig10660.583;evm.model.…	0.00365	0.219277
				GO:0004519	endonuclease activity	35	8	2.17	0.00111	MF	evm.model.Contig11642.462;evm.model.Contig2712.2033;evm.model.Contig2712.2034;evm.model.Contig3364.182;evm.model.Contig5386.928;evm.model.Contig5483.632_evm.model.Contig5483.633;evm.model.Contig75.305;evm.model.Contig9220.925	0.00482321	0.00963855
				GO:0005515	protein binding	2891	214	179.36	0.00143	MF	evm.model.Contig10143.1008;evm.model.Contig10143.1011;evm.model.Contig10143.1036;evm.model.Contig10143.1049;evm.model.Contig10143.34;evm.model.Contig10143.395;evm.model.Contig10143.494;evm.model.Contig10143.586;evm.model.Contig10143.674;evm.model.Contig10143.694;evm.model.Contig10143.700;evm.model.Contig10143.732;evm.model.Contig10143.762;evm.model.Contig10143.791;evm.model.Contig10440.21;evm.mod…	0.00599943	0.257831
				GO:0016893	endonuclease activity, active with either ribo- or deoxyribonucleic acids and producing 5'-phosphomonoesters	16	5	0.99	0.00223	MF	evm.model.Contig2712.2033;evm.model.Contig2712.2034;evm.model.Contig3364.182;evm.model.Contig5386.928;evm.model.Contig5483.632_evm.model.Contig5483.633	0.00894451	0.0060241
				GO:0043167	ion binding	4084	289	253.38	0.00256	MF	evm.model.Contig10143.1008;evm.model.Contig10143.1036;evm.model.Contig10143.1049;evm.model.Contig10143.170;evm.model.Contig10143.216;evm.model.Contig10143.271;evm.model.Contig10143.355;evm.model.Contig10143.395;evm.model.Contig10143.398;evm.model.Contig10143.426;evm.model.Contig10143.510;evm.model.Contig10143.526;evm.model.Contig10143.577;evm.model.Contig10143.586;evm.model.Contig10143.666_evm.mo…	0.0101565	0.348193
				GO:0016740	transferase activity	1863	143	115.58	0.00295	MF	evm.model.Contig10143.131;evm.model.Contig10143.355;evm.model.Contig10143.510;evm.model.Contig10143.55;evm.model.Contig10143.577;evm.model.Contig10143.664_evm.model.Contig10143.665;evm.model.Contig10660.111;evm.model.Contig10660.308;evm.model.Contig10660.583;evm.model.Contig11518.2;evm.model.Contig11518.99;evm.model.Contig11642.1204;evm.model.Contig11642.1279;evm.model.Contig11642.1315;evm.model.…	0.0112161	0.172289
				GO:0140098	catalytic activity, acting on RNA	189	22	11.73	0.00323	MF	evm.model.Contig10143.131;evm.model.Contig10143.664_evm.model.Contig10143.665;evm.model.Contig14326.148;evm.model.Contig2581.540;evm.model.Contig2581.605;evm.model.Contig2685.1065;evm.model.Contig2712.1804;evm.model.Contig2712.503;evm.model.Contig3230.91;evm.model.Contig3364.182;evm.model.Contig5386.651;evm.model.Contig5386.928;evm.model.Contig5482.144;evm.model.Contig5483.419;evm.model.Contig548…	0.0120301	0.026506
				GO:0003899	DNA-directed 5'-3' RNA polymerase activity	50	9	3.1	0.00327	MF	evm.model.Contig10143.131;evm.model.Contig14326.148;evm.model.Contig2685.1065;evm.model.Contig5482.144;evm.model.Contig5483.419;evm.model.Contig6055.457;evm.model.Contig6055.79;evm.model.Contig9868.347;evm.model.Contig9868.54	0.0120561	0.0108434
				GO:0016887	ATPase activity	328	33	20.35	0.00409	MF	evm.model.Contig10143.398;evm.model.Contig11518.81;evm.model.Contig2581.342;evm.model.Contig2581.903;evm.model.Contig2685.1241;evm.model.Contig2685.3;evm.model.Contig2685.443;evm.model.Contig2685.91;evm.model.Contig2712.2033;evm.model.Contig2712.2034;evm.model.Contig2712.279;evm.model.Contig2712.769_evm.model.Contig2712.770;evm.model.Contig3098.167;evm.model.Contig3098.280;evm.model.Contig3098.31…	0.0144937	0.039759
				GO:0034062	5'-3' RNA polymerase activity	56	9	3.47	0.0071	MF	evm.model.Contig10143.131;evm.model.Contig14326.148;evm.model.Contig2685.1065;evm.model.Contig5482.144;evm.model.Contig5483.419;evm.model.Contig6055.457;evm.model.Contig6055.79;evm.model.Contig9868.347;evm.model.Contig9868.54	0.0233468	0.0108434
				GO:0097747	RNA polymerase activity	56	9	3.47	0.0071	MF	evm.model.Contig10143.131;evm.model.Contig14326.148;evm.model.Contig2685.1065;evm.model.Contig5482.144;evm.model.Contig5483.419;evm.model.Contig6055.457;evm.model.Contig6055.79;evm.model.Contig9868.347;evm.model.Contig9868.54	0.0233468	0.0108434
				GO:0016772	transferase activity, transferring phosphorus-containing groups	1166	92	72.34	0.00856	MF	evm.model.Contig10143.131;evm.model.Contig10143.355;evm.model.Contig10143.510;evm.model.Contig10143.577;evm.model.Contig10660.111;evm.model.Contig10660.583;evm.model.Contig11518.2;evm.model.Contig11518.99;evm.model.Contig11642.1204;evm.model.Contig11642.1321;evm.model.Contig11642.1733;evm.model.Contig11642.657;evm.model.Contig11642.768;evm.model.Contig14326.148;evm.model.Contig14326.223;evm.model…	0.0276496	0.110843
				GO:0003700	DNA-binding transcription factor activity	523	46	32.45	0.01019	MF	evm.model.Contig10143.1020;evm.model.Contig10143.1049;evm.model.Contig10143.1183;evm.model.Contig10143.1188;evm.model.Contig10440.2;evm.model.Contig10660.191;evm.model.Contig11518.56;evm.model.Contig11642.451;evm.model.Contig11642.527;evm.model.Contig11642.777;evm.model.Contig186471.1;evm.model.Contig2581.586;evm.model.Contig2581.889;evm.model.Contig2685.309;evm.model.Contig2685.427;evm.model.Con…	0.0323422	0.0554217
				GO:0043565	sequence-specific DNA binding	364	34	22.58	0.01099	MF	evm.model.Contig10143.1020;evm.model.Contig10143.1049;evm.model.Contig10143.1183;evm.model.Contig10143.1188;evm.model.Contig10440.2;evm.model.Contig11518.56;evm.model.Contig11642.451;evm.model.Contig11642.777;evm.model.Contig2685.427;evm.model.Contig2685.693;evm.model.Contig2685.91;evm.model.Contig2712.1565;evm.model.Contig2712.44;evm.model.Contig2712.72;evm.model.Contig2800.35;evm.model.Contig32…	0.034285	0.0409639
				GO:0003723	RNA binding	378	35	23.45	0.01132	MF	evm.model.Contig10660.269;evm.model.Contig10660.427;evm.model.Contig11518.99;evm.model.Contig14326.1066;evm.model.Contig16184.142;evm.model.Contig2581.146;evm.model.Contig2581.711;evm.model.Contig2581.833;evm.model.Contig2685.166;evm.model.Contig2712.1335;evm.model.Contig2712.1418;evm.model.Contig2712.1558;evm.model.Contig2712.284;evm.model.Contig2712.994;evm.model.Contig3098.244;evm.model.Contig…	0.0350152	0.0421687
				GO:0140110	transcription regulator activity	538	46	33.38	0.01631	MF	evm.model.Contig10143.1020;evm.model.Contig10143.1049;evm.model.Contig10143.1183;evm.model.Contig10143.1188;evm.model.Contig10440.2;evm.model.Contig10660.191;evm.model.Contig11518.56;evm.model.Contig11642.451;evm.model.Contig11642.527;evm.model.Contig11642.777;evm.model.Contig186471.1;evm.model.Contig2581.586;evm.model.Contig2581.889;evm.model.Contig2685.309;evm.model.Contig2685.427;evm.model.Con…	0.0447605	0.0554217
				GO:0006259	DNA metabolic process	195	47	10.96	3.2e-18	BP	evm.model.Contig10143.426;evm.model.Contig10143.548;evm.model.Contig11642.1290;evm.model.Contig11642.462;evm.model.Contig11642.768;evm.model.Contig11642.84;evm.model.Contig12381.80;evm.model.Contig14326.124;evm.model.Contig14326.733;evm.model.Contig2581.418;evm.model.Contig2581.724;evm.model.Contig2581.903;evm.model.Contig2685.91;evm.model.Contig2685.953;evm.model.Contig2712.1507;evm.model.Contig…	1.168e-15	0.0566265
				GO:0090304	nucleic acid metabolic process	476	76	26.74	1.5e-17	BP	evm.model.Contig10143.1045;evm.model.Contig10143.426;evm.model.Contig10143.548;evm.model.Contig10143.664_evm.model.Contig10143.665;evm.model.Contig11518.99;evm.model.Contig11642.1290;evm.model.Contig11642.462;evm.model.Contig11642.768;evm.model.Contig11642.84;evm.model.Contig12381.80;evm.model.Contig14326.124;evm.model.Contig14326.733;evm.model.Contig16184.54;evm.model.Contig2581.245;evm.model.Co…	2.7375e-15	0.0915663
				GO:0006139	nucleobase-containing compound metabolic process	725	89	40.73	3.2e-13	BP	evm.model.Contig10143.1045;evm.model.Contig10143.426;evm.model.Contig10143.548;evm.model.Contig10143.664_evm.model.Contig10143.665;evm.model.Contig11518.99;evm.model.Contig11642.1290;evm.model.Contig11642.462;evm.model.Contig11642.5;evm.model.Contig11642.768;evm.model.Contig11642.84;evm.model.Contig12381.80;evm.model.Contig14326.124;evm.model.Contig14326.685;evm.model.Contig14326.733;evm.model.Co…	2.92e-11	0.107229
				GO:0043170	macromolecule metabolic process	2612	217	146.75	8.3e-13	BP	evm.model.Contig10143.1045;evm.model.Contig10143.14;evm.model.Contig10143.355;evm.model.Contig10143.393;evm.model.Contig10143.426;evm.model.Contig10143.510;evm.model.Contig10143.523;evm.model.Contig10143.548;evm.model.Contig10143.55;evm.model.Contig10143.577;evm.model.Contig10143.664_evm.model.Contig10143.665;evm.model.Contig10143.704;evm.model.Contig10143.732;evm.model.Contig10660.111;evm.model.…	6.059e-11	0.261446
				GO:0006807	nitrogen compound metabolic process	3072	242	172.6	4.5e-12	BP	evm.model.Contig10143.1045;evm.model.Contig10143.14;evm.model.Contig10143.355;evm.model.Contig10143.393;evm.model.Contig10143.426;evm.model.Contig10143.510;evm.model.Contig10143.523;evm.model.Contig10143.548;evm.model.Contig10143.577;evm.model.Contig10143.664_evm.model.Contig10143.665;evm.model.Contig10143.704;evm.model.Contig10143.732;evm.model.Contig10660.111;evm.model.Contig10660.213;evm.model…	2.34643e-10	0.291566
				GO:0006725	cellular aromatic compound metabolic process	858	94	48.21	5e-11	BP	evm.model.Contig10143.1045;evm.model.Contig10143.426;evm.model.Contig10143.548;evm.model.Contig10143.664_evm.model.Contig10143.665;evm.model.Contig11518.99;evm.model.Contig11642.1290;evm.model.Contig11642.462;evm.model.Contig11642.5;evm.model.Contig11642.768;evm.model.Contig11642.84;evm.model.Contig12381.80;evm.model.Contig14326.124;evm.model.Contig14326.685;evm.model.Contig14326.733;evm.model.Co…	2.28125e-09	0.113253
				GO:0046483	heterocycle metabolic process	861	94	48.37	6.1e-11	BP	evm.model.Contig10143.1045;evm.model.Contig10143.426;evm.model.Contig10143.548;evm.model.Contig10143.664_evm.model.Contig10143.665;evm.model.Contig11518.99;evm.model.Contig11642.1290;evm.model.Contig11642.462;evm.model.Contig11642.5;evm.model.Contig11642.768;evm.model.Contig11642.84;evm.model.Contig12381.80;evm.model.Contig14326.124;evm.model.Contig14326.685;evm.model.Contig14326.733;evm.model.Co…	2.47389e-09	0.113253
				GO:0009987	cellular process	4336	308	243.61	8.2e-11	BP	evm.model.Contig10143.1045;evm.model.Contig10143.271;evm.model.Contig10143.300;evm.model.Contig10143.355;evm.model.Contig10143.365;evm.model.Contig10143.393;evm.model.Contig10143.426;evm.model.Contig10143.510;evm.model.Contig10143.523;evm.model.Contig10143.548;evm.model.Contig10143.55;evm.model.Contig10143.577;evm.model.Contig10143.664_evm.model.Contig10143.665;evm.model.Contig10143.700;evm.model…	2.72091e-09	0.371084
				GO:1901360	organic cyclic compound metabolic process	892	96	50.12	8.2e-11	BP	evm.model.Contig10143.1045;evm.model.Contig10143.426;evm.model.Contig10143.548;evm.model.Contig10143.664_evm.model.Contig10143.665;evm.model.Contig11518.99;evm.model.Contig11642.1290;evm.model.Contig11642.462;evm.model.Contig11642.5;evm.model.Contig11642.768;evm.model.Contig11642.84;evm.model.Contig12381.80;evm.model.Contig14326.124;evm.model.Contig14326.685;evm.model.Contig14326.733;evm.model.Co…	2.72091e-09	0.115663
				GO:0044260	cellular macromolecule metabolic process	2103	178	118.16	1.3e-10	BP	evm.model.Contig10143.1045;evm.model.Contig10143.355;evm.model.Contig10143.393;evm.model.Contig10143.426;evm.model.Contig10143.510;evm.model.Contig10143.523;evm.model.Contig10143.548;evm.model.Contig10143.55;evm.model.Contig10143.577;evm.model.Contig10143.704;evm.model.Contig10143.732;evm.model.Contig10660.111;evm.model.Contig10660.583;evm.model.Contig10660.95;evm.model.Contig11518.2;evm.model.Co…	3.65e-09	0.214458
				GO:0044238	primary metabolic process	3798	278	213.39	1.5e-10	BP	evm.model.Contig10143.1045;evm.model.Contig10143.14;evm.model.Contig10143.300;evm.model.Contig10143.355;evm.model.Contig10143.365;evm.model.Contig10143.393;evm.model.Contig10143.426;evm.model.Contig10143.510;evm.model.Contig10143.523;evm.model.Contig10143.548;evm.model.Contig10143.55;evm.model.Contig10143.577;evm.model.Contig10143.664_evm.model.Contig10143.665;evm.model.Contig10143.666_evm.model.…	3.65e-09	0.33494
				GO:0006281	DNA repair	111	26	6.24	2.7e-10	BP	evm.model.Contig10143.426;evm.model.Contig10143.548;evm.model.Contig11642.1290;evm.model.Contig11642.462;evm.model.Contig11642.768;evm.model.Contig12381.80;evm.model.Contig14326.124;evm.model.Contig14326.733;evm.model.Contig2581.418;evm.model.Contig2685.91;evm.model.Contig2685.953;evm.model.Contig2712.1507;evm.model.Contig2712.1951;evm.model.Contig2800.36;evm.model.Contig3098.82;evm.model.Contig3…	6.15938e-09	0.0313253
				GO:0006974	cellular response to DNA damage stimulus	112	26	6.29	3.4e-10	BP	evm.model.Contig10143.426;evm.model.Contig10143.548;evm.model.Contig11642.1290;evm.model.Contig11642.462;evm.model.Contig11642.768;evm.model.Contig12381.80;evm.model.Contig14326.124;evm.model.Contig14326.733;evm.model.Contig2581.418;evm.model.Contig2685.91;evm.model.Contig2685.953;evm.model.Contig2712.1507;evm.model.Contig2712.1951;evm.model.Contig2800.36;evm.model.Contig3098.82;evm.model.Contig3…	6.89444e-09	0.0313253
				GO:0033554	cellular response to stress	112	26	6.29	3.4e-10	BP	evm.model.Contig10143.426;evm.model.Contig10143.548;evm.model.Contig11642.1290;evm.model.Contig11642.462;evm.model.Contig11642.768;evm.model.Contig12381.80;evm.model.Contig14326.124;evm.model.Contig14326.733;evm.model.Contig2581.418;evm.model.Contig2685.91;evm.model.Contig2685.953;evm.model.Contig2712.1507;evm.model.Contig2712.1951;evm.model.Contig2800.36;evm.model.Contig3098.82;evm.model.Contig3…	6.89444e-09	0.0313253
				GO:0044237	cellular metabolic process	3355	248	188.5	3.3e-09	BP	evm.model.Contig10143.1045;evm.model.Contig10143.300;evm.model.Contig10143.355;evm.model.Contig10143.365;evm.model.Contig10143.393;evm.model.Contig10143.426;evm.model.Contig10143.510;evm.model.Contig10143.523;evm.model.Contig10143.548;evm.model.Contig10143.55;evm.model.Contig10143.577;evm.model.Contig10143.664_evm.model.Contig10143.665;evm.model.Contig10143.704;evm.model.Contig10143.732;evm.model…	4.30179e-08	0.298795
				GO:0071704	organic substance metabolic process	4058	284	227.99	2.1e-08	BP	evm.model.Contig10143.1045;evm.model.Contig10143.14;evm.model.Contig10143.300;evm.model.Contig10143.355;evm.model.Contig10143.365;evm.model.Contig10143.393;evm.model.Contig10143.426;evm.model.Contig10143.510;evm.model.Contig10143.523;evm.model.Contig10143.548;evm.model.Contig10143.55;evm.model.Contig10143.577;evm.model.Contig10143.664_evm.model.Contig10143.665;evm.model.Contig10143.666_evm.model.…	2.47258e-07	0.342169
				GO:0051276	chromosome organization	122	24	6.85	5.2e-08	BP	evm.model.Contig10660.530;evm.model.Contig10660.572;evm.model.Contig11518.7;evm.model.Contig12381.158;evm.model.Contig12381.67;evm.model.Contig2581.635;evm.model.Contig2581.903;evm.model.Contig2685.678;evm.model.Contig2685.91;evm.model.Contig2712.1185;evm.model.Contig2712.1496;evm.model.Contig2712.446;evm.model.Contig2712.665;evm.model.Contig2800.141;evm.model.Contig5373.259;evm.model.Contig5386.…	5.93125e-07	0.0289157
				GO:0034641	cellular nitrogen compound metabolic process	1309	115	73.54	1.7e-07	BP	evm.model.Contig10143.1045;evm.model.Contig10143.426;evm.model.Contig10143.548;evm.model.Contig10143.664_evm.model.Contig10143.665;evm.model.Contig10660.605;evm.model.Contig10660.95;evm.model.Contig11518.99;evm.model.Contig11642.1290;evm.model.Contig11642.462;evm.model.Contig11642.5;evm.model.Contig11642.768;evm.model.Contig11642.792;evm.model.Contig11642.84;evm.model.Contig12381.333;evm.model.Co…	1.825e-06	0.138554
				GO:0006996	organelle organization	236	33	13.26	9.3e-07	BP	evm.model.Contig10660.530;evm.model.Contig10660.572;evm.model.Contig11518.7;evm.model.Contig12381.158;evm.model.Contig12381.67;evm.model.Contig14326.561;evm.model.Contig2581.635;evm.model.Contig2581.903;evm.model.Contig2685.1094;evm.model.Contig2685.678;evm.model.Contig2685.91;evm.model.Contig2712.1185;evm.model.Contig2712.1496;evm.model.Contig2712.33;evm.model.Contig2712.446;evm.model.Contig2712…	9.42917e-06	0.039759
				GO:0071103	DNA conformation change	79	17	4.44	1.3e-06	BP	evm.model.Contig10660.530;evm.model.Contig12381.158;evm.model.Contig2581.635;evm.model.Contig2581.903;evm.model.Contig2685.678;evm.model.Contig2712.1185;evm.model.Contig2712.1496;evm.model.Contig2712.446;evm.model.Contig2712.665;evm.model.Contig5373.259;evm.model.Contig5386.7;evm.model.Contig5387.493;evm.model.Contig5483.245;evm.model.Contig7167.472;evm.model.Contig8624.670;evm.model.Contig9868.7…	1.28243e-05	0.0204819
				GO:0051716	cellular response to stimulus	380	41	21.35	3.6e-05	BP	evm.model.Contig10143.271;evm.model.Contig10143.426;evm.model.Contig10143.548;evm.model.Contig10143.700;evm.model.Contig11642.1290;evm.model.Contig11642.462;evm.model.Contig11642.768;evm.model.Contig12381.80;evm.model.Contig14326.124;evm.model.Contig14326.557;evm.model.Contig14326.733;evm.model.Contig2581.418;evm.model.Contig2581.481;evm.model.Contig2685.1097;evm.model.Contig2685.1114;evm.model.C…	0.000243333	0.0493976
				GO:0006260	DNA replication	47	11	2.64	4.3e-05	BP	evm.model.Contig11642.84;evm.model.Contig2581.724;evm.model.Contig2712.1908;evm.model.Contig2712.234;evm.model.Contig2712.358;evm.model.Contig5252.1125;evm.model.Contig5373.542;evm.model.Contig5387.355;evm.model.Contig5483.132;evm.model.Contig6055.133;evm.model.Contig9220.704	0.000275351	0.013253
				GO:0006479	protein methylation	20	7	1.12	6.9e-05	BP	evm.model.Contig12381.67;evm.model.Contig15511.2;evm.model.Contig2685.909;evm.model.Contig2712.19;evm.model.Contig2800.141;evm.model.Contig6055.467;evm.model.Contig8573.431	0.000426864	0.00843373
				GO:0008213	protein alkylation	20	7	1.12	6.9e-05	BP	evm.model.Contig12381.67;evm.model.Contig15511.2;evm.model.Contig2685.909;evm.model.Contig2712.19;evm.model.Contig2800.141;evm.model.Contig6055.467;evm.model.Contig8573.431	0.000426864	0.00843373
				GO:0006323	DNA packaging	68	13	3.82	8.5e-05	BP	evm.model.Contig10660.530;evm.model.Contig12381.158;evm.model.Contig2581.635;evm.model.Contig2685.678;evm.model.Contig2712.1185;evm.model.Contig2712.1496;evm.model.Contig2712.446;evm.model.Contig2712.665;evm.model.Contig5373.259;evm.model.Contig5386.7;evm.model.Contig5387.493;evm.model.Contig5483.245;evm.model.Contig9868.717	0.000517083	0.0156627
				GO:0071840	cellular component organization or biogenesis	453	45	25.45	0.00011	BP	evm.model.Contig10660.119;evm.model.Contig10660.530;evm.model.Contig10660.572;evm.model.Contig11518.7;evm.model.Contig11642.1157;evm.model.Contig12381.158;evm.model.Contig12381.627;evm.model.Contig12381.67;evm.model.Contig14326.1000;evm.model.Contig14326.561;evm.model.Contig14326.998;evm.model.Contig2581.635;evm.model.Contig2581.903;evm.model.Contig2685.1094;evm.model.Contig2685.678;evm.model.Con…	0.000658197	0.0542169
				GO:0006298	mismatch repair	13	5	0.73	0.00048	BP	evm.model.Contig10143.426;evm.model.Contig11642.1290;evm.model.Contig14326.733;evm.model.Contig33180.312;evm.model.Contig5387.153	0.00243333	0.0060241
				GO:0016043	cellular component organization	401	39	22.53	0.0005	BP	evm.model.Contig10660.530;evm.model.Contig10660.572;evm.model.Contig11518.7;evm.model.Contig11642.1157;evm.model.Contig12381.158;evm.model.Contig12381.627;evm.model.Contig12381.67;evm.model.Contig14326.1000;evm.model.Contig14326.561;evm.model.Contig14326.998;evm.model.Contig2581.635;evm.model.Contig2581.903;evm.model.Contig2685.1094;evm.model.Contig2685.678;evm.model.Contig2685.91;evm.model.Conti…	0.00246622	0.046988
				GO:0006325	chromatin organization	91	14	5.11	0.00051	BP	evm.model.Contig10660.572;evm.model.Contig11518.7;evm.model.Contig12381.158;evm.model.Contig12381.67;evm.model.Contig2581.635;evm.model.Contig2685.678;evm.model.Contig2712.1496;evm.model.Contig2712.446;evm.model.Contig2712.665;evm.model.Contig2800.141;evm.model.Contig5373.259;evm.model.Contig5386.7;evm.model.Contig5387.493;evm.model.Contig5483.245	0.002482	0.0168675
				GO:0043414	macromolecule methylation	35	8	1.97	0.00057	BP	evm.model.Contig12381.67;evm.model.Contig15511.2;evm.model.Contig2685.909;evm.model.Contig2712.19;evm.model.Contig2800.141;evm.model.Contig3230.283;evm.model.Contig6055.467;evm.model.Contig8573.431	0.00270195	0.00963855
				GO:0016070	RNA metabolic process	284	30	15.96	0.00059	BP	evm.model.Contig10143.1045;evm.model.Contig10143.664_evm.model.Contig10143.665;evm.model.Contig11518.99;evm.model.Contig16184.54;evm.model.Contig2581.245;evm.model.Contig2581.540;evm.model.Contig2581.605;evm.model.Contig2581.705;evm.model.Contig2581.833;evm.model.Contig2712.1335;evm.model.Contig2712.1558;evm.model.Contig2712.1630;evm.model.Contig2712.1804;evm.model.Contig2712.284;evm.model.Contig…	0.0027609	0.0361446
				GO:0006950	response to stress	341	34	19.16	0.00074	BP	evm.model.Contig10143.426;evm.model.Contig10143.510;evm.model.Contig10143.548;evm.model.Contig11642.1290;evm.model.Contig11642.462;evm.model.Contig11642.768;evm.model.Contig12381.80;evm.model.Contig14326.124;evm.model.Contig14326.733;evm.model.Contig2581.418;evm.model.Contig2685.91;evm.model.Contig2685.953;evm.model.Contig2712.1507;evm.model.Contig2712.1909;evm.model.Contig2712.1951;evm.model.Con…	0.00341899	0.0409639
				GO:0043412	macromolecule modification	1147	88	64.44	0.00102	BP	evm.model.Contig10143.355;evm.model.Contig10143.393;evm.model.Contig10143.510;evm.model.Contig10143.577;evm.model.Contig10143.664_evm.model.Contig10143.665;evm.model.Contig10660.111;evm.model.Contig10660.583;evm.model.Contig11518.2;evm.model.Contig11518.7;evm.model.Contig11642.1204;evm.model.Contig11642.1279;evm.model.Contig11642.1321;evm.model.Contig11642.1733;evm.model.Contig11642.740;evm.model…	0.00448554	0.106024
				GO:0006464	cellular protein modification process	1095	84	61.52	0.00137	BP	evm.model.Contig10143.355;evm.model.Contig10143.393;evm.model.Contig10143.510;evm.model.Contig10143.577;evm.model.Contig10660.111;evm.model.Contig10660.583;evm.model.Contig11518.2;evm.model.Contig11518.7;evm.model.Contig11642.1204;evm.model.Contig11642.1279;evm.model.Contig11642.1321;evm.model.Contig11642.1733;evm.model.Contig11642.740;evm.model.Contig12381.119;evm.model.Contig12381.353;evm.model…	0.00581454	0.101205
				GO:0036211	protein modification process	1095	84	61.52	0.00137	BP	evm.model.Contig10143.355;evm.model.Contig10143.393;evm.model.Contig10143.510;evm.model.Contig10143.577;evm.model.Contig10660.111;evm.model.Contig10660.583;evm.model.Contig11518.2;evm.model.Contig11518.7;evm.model.Contig11642.1204;evm.model.Contig11642.1279;evm.model.Contig11642.1321;evm.model.Contig11642.1733;evm.model.Contig11642.740;evm.model.Contig12381.119;evm.model.Contig12381.353;evm.model…	0.00581454	0.101205
				GO:0044267	cellular protein metabolic process	1746	124	98.1	0.00172	BP	evm.model.Contig10143.355;evm.model.Contig10143.393;evm.model.Contig10143.510;evm.model.Contig10143.523;evm.model.Contig10143.577;evm.model.Contig10143.704;evm.model.Contig10143.732;evm.model.Contig10660.111;evm.model.Contig10660.583;evm.model.Contig10660.95;evm.model.Contig11518.2;evm.model.Contig11518.7;evm.model.Contig11642.1003;evm.model.Contig11642.1204;evm.model.Contig11642.1279;evm.model.C…	0.00705393	0.149398
				GO:0032259	methylation	41	8	2.3	0.00172	BP	evm.model.Contig12381.67;evm.model.Contig15511.2;evm.model.Contig2685.909;evm.model.Contig2712.19;evm.model.Contig2800.141;evm.model.Contig3230.283;evm.model.Contig6055.467;evm.model.Contig8573.431	0.00705393	0.00963855
S3axis,S4axis	purple			GO:0006281	DNA repair	111	11	2.58	5e-05	BP	evm.model.Contig12381.319;evm.model.Contig14326.375;evm.model.Contig16184.135;evm.model.Contig2685.1086;evm.model.Contig2685.480;evm.model.Contig29751.183;evm.model.Contig33180.246;evm.model.Contig7167.555;evm.model.Contig8573.286;evm.model.Contig8624.45;evm.model.Contig9867.268	0.003366	0.03207
				GO:0006974	cellular response to DNA damage stimulus	112	11	2.61	5.4e-05	BP	evm.model.Contig12381.319;evm.model.Contig14326.375;evm.model.Contig16184.135;evm.model.Contig2685.1086;evm.model.Contig2685.480;evm.model.Contig29751.183;evm.model.Contig33180.246;evm.model.Contig7167.555;evm.model.Contig8573.286;evm.model.Contig8624.45;evm.model.Contig9867.268	0.003366	0.03207
				GO:0033554	cellular response to stress	112	11	2.61	5.4e-05	BP	evm.model.Contig12381.319;evm.model.Contig14326.375;evm.model.Contig16184.135;evm.model.Contig2685.1086;evm.model.Contig2685.480;evm.model.Contig29751.183;evm.model.Contig33180.246;evm.model.Contig7167.555;evm.model.Contig8573.286;evm.model.Contig8624.45;evm.model.Contig9867.268	0.003366	0.03207
				GO:0006633	fatty acid biosynthetic process	74	8	1.72	0.0003	BP	evm.model.Contig2712.1657;evm.model.Contig5373.280;evm.model.Contig5386.908;evm.model.Contig5483.627;evm.model.Contig5483.628;evm.model.Contig75.235;evm.model.Contig8624.515;evm.model.Contig9220.1058	0.014025	0.0233236
				GO:0008610	lipid biosynthetic process	168	12	3.91	0.00052	BP	evm.model.Contig10143.1252;evm.model.Contig11642.1267;evm.model.Contig2685.742;evm.model.Contig2712.1657;evm.model.Contig3230.55;evm.model.Contig5373.280;evm.model.Contig5386.908;evm.model.Contig5483.627;evm.model.Contig5483.628;evm.model.Contig75.235;evm.model.Contig8624.515;evm.model.Contig9220.1058	0.0162067	0.0349854
				GO:0090304	nucleic acid metabolic process	476	23	11.07	0.00064	BP	evm.model.Contig12381.319;evm.model.Contig14326.375;evm.model.Contig16184.135;evm.model.Contig16184.20;evm.model.Contig2685.1086;evm.model.Contig2685.480;evm.model.Contig2685.787;evm.model.Contig2712.1686;evm.model.Contig2712.64;evm.model.Contig2712.862;evm.model.Contig29751.183;evm.model.Contig3098.17;evm.model.Contig33180.246;evm.model.Contig5252.167;evm.model.Contig5482.283;evm.model.Contig548…	0.0170971	0.0670554
				GO:0006950	response to stress	341	18	7.93	0.00094	BP	evm.model.Contig12381.319;evm.model.Contig14326.375;evm.model.Contig16184.135;evm.model.Contig2581.174;evm.model.Contig2581.899;evm.model.Contig2685.1086;evm.model.Contig2685.480;evm.model.Contig29751.183;evm.model.Contig31421.1;evm.model.Contig33180.246;evm.model.Contig3364.262;evm.model.Contig5252.724;evm.model.Contig5483.688;evm.model.Contig7167.555;evm.model.Contig8573.211;evm.model.Contig857…	0.019448	0.0524781
				GO:0006631	fatty acid metabolic process	89	8	2.07	0.00104	BP	evm.model.Contig2712.1657;evm.model.Contig5373.280;evm.model.Contig5386.908;evm.model.Contig5483.627;evm.model.Contig5483.628;evm.model.Contig75.235;evm.model.Contig8624.515;evm.model.Contig9220.1058	0.019448	0.0233236
				GO:0009628	response to abiotic stimulus	37	5	0.86	0.00154	BP	evm.model.Contig2581.174;evm.model.Contig2712.167;evm.model.Contig31421.1;evm.model.Contig5252.724;evm.model.Contig5483.688	0.02618	0.0145773
				GO:0006259	DNA metabolic process	195	12	4.54	0.00193	BP	evm.model.Contig12381.319;evm.model.Contig14326.375;evm.model.Contig16184.135;evm.model.Contig16184.20;evm.model.Contig2685.1086;evm.model.Contig2685.480;evm.model.Contig29751.183;evm.model.Contig33180.246;evm.model.Contig7167.555;evm.model.Contig8573.286;evm.model.Contig8624.45;evm.model.Contig9867.268	0.0300758	0.0349854
				GO:0050896	response to stimulus	693	28	16.12	0.00262	BP	evm.model.Contig12381.319;evm.model.Contig14326.375;evm.model.Contig14326.95;evm.model.Contig16184.135;evm.model.Contig2581.174;evm.model.Contig2581.899;evm.model.Contig2581.98;evm.model.Contig2685.1086;evm.model.Contig2685.174;evm.model.Contig2685.480;evm.model.Contig2712.167;evm.model.Contig29751.183;evm.model.Contig29751.225;evm.model.Contig31421.1;evm.model.Contig33180.246;evm.model.Contig336…	0.03366	0.0816327
				GO:0043412	macromolecule modification	1147	41	26.68	0.00269	BP	evm.model.Contig10143.978;evm.model.Contig10440.77;evm.model.Contig10440.90;evm.model.Contig11642.263;evm.model.Contig11642.757;evm.model.Contig14326.1083;evm.model.Contig14326.350;evm.model.Contig14326.499;evm.model.Contig2581.392;evm.model.Contig2685.45;evm.model.Contig2685.787;evm.model.Contig2712.1164;evm.model.Contig2712.167;evm.model.Contig2712.1686;evm.model.Contig2712.534;evm.model.Contig…	0.03366	0.119534
				GO:0051716	cellular response to stimulus	380	18	8.84	0.00314	BP	evm.model.Contig12381.319;evm.model.Contig14326.375;evm.model.Contig16184.135;evm.model.Contig2581.98;evm.model.Contig2685.1086;evm.model.Contig2685.480;evm.model.Contig2712.167;evm.model.Contig29751.183;evm.model.Contig33180.246;evm.model.Contig5386.920;evm.model.Contig5483.124;evm.model.Contig5483.359;evm.model.Contig7167.555;evm.model.Contig7167.68;evm.model.Contig8573.286;evm.model.Contig8624…	0.0366988	0.0524781
				GO:0005634	nucleus	708	29	15.83	0.00044	CC	evm.model.Contig11642.907;evm.model.Contig12381.319;evm.model.Contig136640.1;evm.model.Contig2581.174;evm.model.Contig2685.1226;evm.model.Contig2685.45;evm.model.Contig2685.787;evm.model.Contig2712.947;evm.model.Contig2800.164;evm.model.Contig29751.225;evm.model.Contig3098.17;evm.model.Contig3098.25;evm.model.Contig31421.1;evm.model.Contig3230.108;evm.model.Contig33180.326;evm.model.Contig33180.4…	0.0162067	0.0845481
				GO:0003677	DNA binding	1022	42	25.69	0.001	MF	evm.model.Contig10143.1281;evm.model.Contig11518.124;evm.model.Contig11642.907;evm.model.Contig12381.319;evm.model.Contig136640.1;evm.model.Contig14326.368;evm.model.Contig16184.20;evm.model.Contig2581.174;evm.model.Contig2581.374;evm.model.Contig2581.517;evm.model.Contig2685.142;evm.model.Contig2685.380;evm.model.Contig2712.1123;evm.model.Contig2712.1612;evm.model.Contig2712.947;evm.model.Contig…	0.019448	0.122449
				GO:0005515	protein binding	2891	94	72.68	0.0027	MF	evm.model.Contig10143.1039;evm.model.Contig10143.1103;evm.model.Contig10143.1281;evm.model.Contig10143.1288;evm.model.Contig10143.147;evm.model.Contig10143.259;evm.model.Contig10143.344;evm.model.Contig10143.443;evm.model.Contig10143.527;evm.model.Contig10143.741;evm.model.Contig10143.768;evm.model.Contig10143.787;evm.model.Contig10143.840;evm.model.Contig10143.893;evm.model.Contig10440.74;evm.mo…	0.03366	0.274052
S3axis	magenta			GO:0010468	regulation of gene expression	41	5	1.26	0.00789	BP	evm.model.Contig12381.402;evm.model.Contig2712.1961;evm.model.Contig2712.321;evm.model.Contig5387.372;evm.model.Contig9867.840	0.0203727	0.010142
				GO:0080090	regulation of primary metabolic process	60	6	1.84	0.00976	BP	evm.model.Contig12381.402;evm.model.Contig12381.592;evm.model.Contig2712.1482;evm.model.Contig2712.1961;evm.model.Contig2712.321;evm.model.Contig5386.713	0.0230902	0.0121704
				GO:0044248	cellular catabolic process	274	16	8.39	0.00989	BP	evm.model.Contig10660.554;evm.model.Contig11518.53;evm.model.Contig14326.498;evm.model.Contig14326.753;evm.model.Contig16184.95;evm.model.Contig2685.1091;evm.model.Contig2685.39;evm.model.Contig2712.391;evm.model.Contig2712.859;evm.model.Contig5252.883;evm.model.Contig5387.372;evm.model.Contig8624.802;evm.model.Contig9220.430;evm.model.Contig9220.654;evm.model.Contig9867.34;evm.model.Contig9867.8…	0.0231212	0.0324544
				GO:0051171	regulation of nitrogen compound metabolic process	62	6	1.9	0.0114	BP	evm.model.Contig12381.402;evm.model.Contig12381.592;evm.model.Contig2712.1482;evm.model.Contig2712.1961;evm.model.Contig2712.321;evm.model.Contig5386.713	0.026296	0.0121704
				GO:0009451	RNA modification	45	5	1.38	0.01165	BP	evm.model.Contig10143.429;evm.model.Contig5252.1325;evm.model.Contig75.287;evm.model.Contig9220.429;evm.model.Contig9867.775	0.0266947	0.010142
				GO:0009058	biosynthetic process	1401	57	42.92	0.012	BP	evm.model.Contig10143.214;evm.model.Contig10143.429;evm.model.Contig10660.179;evm.model.Contig10660.188;evm.model.Contig10660.189;evm.model.Contig10660.538;evm.model.Contig11642.1104;evm.model.Contig11642.1601;evm.model.Contig11642.575;evm.model.Contig12381.402;evm.model.Contig12381.449;evm.model.Contig14326.18;evm.model.Contig14326.185;evm.model.Contig14326.187;evm.model.Contig14326.397;evm.mode…	0.0273158	0.115619
				GO:0051716	cellular response to stimulus	380	20	11.64	0.0125	BP	evm.model.Contig10660.518;evm.model.Contig11518.43;evm.model.Contig11642.1206;evm.model.Contig11642.1622;evm.model.Contig12381.218;evm.model.Contig14326.260;evm.model.Contig2685.470;evm.model.Contig2685.881;evm.model.Contig2712.274;evm.model.Contig29751.1;evm.model.Contig29751.182;evm.model.Contig3094.12;evm.model.Contig3098.131;evm.model.Contig5252.1293;evm.model.Contig5252.537;evm.model.Contig5…	0.028268	0.0405679
				GO:0006650	glycerophospholipid metabolic process	65	6	1.99	0.0142	BP	evm.model.Contig10143.579;evm.model.Contig10143.967;evm.model.Contig10660.179;evm.model.Contig11642.1104;evm.model.Contig2712.274;evm.model.Contig9220.1044	0.0319039	0.0121704
				GO:0046486	glycerolipid metabolic process	68	6	2.08	0.01746	BP	evm.model.Contig10143.579;evm.model.Contig10143.967;evm.model.Contig10660.179;evm.model.Contig11642.1104;evm.model.Contig2712.274;evm.model.Contig9220.1044	0.0384104	0.0121704
				GO:0090407	organophosphate biosynthetic process	197	12	6.03	0.01778	BP	evm.model.Contig10143.214;evm.model.Contig10660.179;evm.model.Contig11642.1104;evm.model.Contig14326.397;evm.model.Contig14326.753;evm.model.Contig2712.274;evm.model.Contig2800.348;evm.model.Contig5386.1127;evm.model.Contig5386.121;evm.model.Contig6055.301;evm.model.Contig8624.802;evm.model.Contig9220.430	0.0386911	0.0243408
				GO:0019637	organophosphate metabolic process	295	16	9.04	0.01886	BP	evm.model.Contig10143.214;evm.model.Contig10143.579;evm.model.Contig10143.967;evm.model.Contig10660.179;evm.model.Contig11642.1104;evm.model.Contig11642.56;evm.model.Contig14326.397;evm.model.Contig14326.753;evm.model.Contig2712.274;evm.model.Contig2800.348;evm.model.Contig5386.1127;evm.model.Contig5386.121;evm.model.Contig6055.301;evm.model.Contig8624.802;evm.model.Contig9220.1044;evm.model.Cont…	0.0405314	0.0324544
				GO:0042254	ribosome biogenesis	51	5	1.56	0.01933	BP	evm.model.Contig11642.1481;evm.model.Contig2685.657;evm.model.Contig5387.264;evm.model.Contig8573.190;evm.model.Contig9867.775	0.0412851	0.010142
				GO:1901576	organic substance biosynthetic process	1272	51	38.97	0.0229	BP	evm.model.Contig10143.214;evm.model.Contig10143.429;evm.model.Contig10660.179;evm.model.Contig10660.538;evm.model.Contig11642.1104;evm.model.Contig11642.1601;evm.model.Contig11642.575;evm.model.Contig12381.402;evm.model.Contig12381.449;evm.model.Contig14326.18;evm.model.Contig14326.187;evm.model.Contig14326.397;evm.model.Contig14326.753;evm.model.Contig16184.51;evm.model.Contig2581.907;evm.model.…	0.0486098	0.103448
				GO:0044424	intracellular part	2021	110	80.9	8.2e-07	CC	evm.model.Contig10143.202;evm.model.Contig10143.214;evm.model.Contig10143.685;evm.model.Contig10143.813;evm.model.Contig10660.179;evm.model.Contig10660.193;evm.model.Contig10660.538;evm.model.Contig10660.554;evm.model.Contig11518.43;evm.model.Contig11642.1004;evm.model.Contig11642.1161;evm.model.Contig11642.1415_evm.model.Contig11642.1416;evm.model.Contig11642.1481;evm.model.Contig11642.1601;evm.…	1.02564e-05	0.223124
				GO:0005634	nucleus	708	53	28.34	9.9e-07	CC	evm.model.Contig10143.202;evm.model.Contig10143.214;evm.model.Contig10660.193;evm.model.Contig11518.43;evm.model.Contig11642.1161;evm.model.Contig11642.1415_evm.model.Contig11642.1416;evm.model.Contig11642.1481;evm.model.Contig12381.218;evm.model.Contig12381.402;evm.model.Contig12381.411;evm.model.Contig12381.592;evm.model.Contig12381.647;evm.model.Contig14326.260;evm.model.Contig14326.511;evm.mo…	1.18117e-05	0.107505
				GO:0043227	membrane-bounded organelle	959	65	38.39	1.2e-06	CC	evm.model.Contig10143.202;evm.model.Contig10143.214;evm.model.Contig10660.179;evm.model.Contig10660.193;evm.model.Contig11518.43;evm.model.Contig11642.1161;evm.model.Contig11642.1415_evm.model.Contig11642.1416;evm.model.Contig11642.1481;evm.model.Contig12381.218;evm.model.Contig12381.402;evm.model.Contig12381.411;evm.model.Contig12381.592;evm.model.Contig12381.647;evm.model.Contig14326.260;evm.mo…	1.384e-05	0.131846
				GO:0042555	MCM complex	7	5	0.28	1.9e-06	CC	evm.model.Contig16184.51;evm.model.Contig2685.1102;evm.model.Contig2685.1124;evm.model.Contig3230.165;evm.model.Contig6055.11	1.93353e-05	0.010142
				GO:0043231	intracellular membrane-bounded organelle	946	62	37.87	8.6e-06	CC	evm.model.Contig10143.202;evm.model.Contig10143.214;evm.model.Contig10660.179;evm.model.Contig10660.193;evm.model.Contig11518.43;evm.model.Contig11642.1161;evm.model.Contig11642.1415_evm.model.Contig11642.1416;evm.model.Contig11642.1481;evm.model.Contig12381.218;evm.model.Contig12381.402;evm.model.Contig12381.411;evm.model.Contig12381.592;evm.model.Contig12381.647;evm.model.Contig14326.260;evm.mo…	7.62974e-05	0.125761
				GO:0005623	cell	2336	118	93.51	1.5e-05	CC	evm.model.Contig10143.202;evm.model.Contig10143.214;evm.model.Contig10143.685;evm.model.Contig10143.813;evm.model.Contig10660.179;evm.model.Contig10660.193;evm.model.Contig10660.538;evm.model.Contig10660.554;evm.model.Contig11518.43;evm.model.Contig11642.1004;evm.model.Contig11642.1161;evm.model.Contig11642.1355;evm.model.Contig11642.1415_evm.model.Contig11642.1416;evm.model.Contig11642.1481;evm.…	0.000112826	0.239351
				GO:0044464	cell part	2336	118	93.51	1.5e-05	CC	evm.model.Contig10143.202;evm.model.Contig10143.214;evm.model.Contig10143.685;evm.model.Contig10143.813;evm.model.Contig10660.179;evm.model.Contig10660.193;evm.model.Contig10660.538;evm.model.Contig10660.554;evm.model.Contig11518.43;evm.model.Contig11642.1004;evm.model.Contig11642.1161;evm.model.Contig11642.1355;evm.model.Contig11642.1415_evm.model.Contig11642.1416;evm.model.Contig11642.1481;evm.…	0.000112826	0.239351
				GO:0005622	intracellular	2241	114	89.71	2.4e-05	CC	evm.model.Contig10143.202;evm.model.Contig10143.214;evm.model.Contig10143.685;evm.model.Contig10143.813;evm.model.Contig10660.179;evm.model.Contig10660.193;evm.model.Contig10660.538;evm.model.Contig10660.554;evm.model.Contig11518.43;evm.model.Contig11642.1004;evm.model.Contig11642.1161;evm.model.Contig11642.1355;evm.model.Contig11642.1415_evm.model.Contig11642.1416;evm.model.Contig11642.1481;evm.…	0.000162823	0.231237
				GO:0044428	nuclear part	133	15	5.32	0.00022	CC	evm.model.Contig11642.1161;evm.model.Contig12381.402;evm.model.Contig12381.647;evm.model.Contig14326.895;evm.model.Contig16184.46;evm.model.Contig2581.600;evm.model.Contig2712.1482;evm.model.Contig2712.321;evm.model.Contig29751.182;evm.model.Contig3098.29;evm.model.Contig5252.523;evm.model.Contig5373.118;evm.model.Contig5387.382;evm.model.Contig5483.547;evm.model.Contig7167.262	0.00100158	0.030426
				GO:0030117	membrane coat	57	9	2.28	0.00036	CC	evm.model.Contig2581.770;evm.model.Contig2712.1740;evm.model.Contig3098.160;evm.model.Contig5373.570;evm.model.Contig5386.46;evm.model.Contig5483.805;evm.model.Contig6055.252;evm.model.Contig7167.253;evm.model.Contig7167.496	0.00146541	0.0182556
				GO:0048475	coated membrane	57	9	2.28	0.00036	CC	evm.model.Contig2581.770;evm.model.Contig2712.1740;evm.model.Contig3098.160;evm.model.Contig5373.570;evm.model.Contig5386.46;evm.model.Contig5483.805;evm.model.Contig6055.252;evm.model.Contig7167.253;evm.model.Contig7167.496	0.00146541	0.0182556
				GO:0005667	transcription factor complex	36	7	1.44	0.00045	CC	evm.model.Contig10143.813;evm.model.Contig2581.355;evm.model.Contig2712.1482;evm.model.Contig29751.182;evm.model.Contig5373.118;evm.model.Contig5373.498;evm.model.Contig9220.595	0.00176932	0.0141988
				GO:0043226	organelle	1524	81	61.01	0.00059	CC	evm.model.Contig10143.202;evm.model.Contig10143.214;evm.model.Contig10660.179;evm.model.Contig10660.193;evm.model.Contig11518.43;evm.model.Contig11642.1004;evm.model.Contig11642.1161;evm.model.Contig11642.1415_evm.model.Contig11642.1416;evm.model.Contig11642.1481;evm.model.Contig11642.1601;evm.model.Contig11642.1652;evm.model.Contig12381.123;evm.model.Contig12381.218;evm.model.Contig12381.402;evm…	0.0022433	0.1643
				GO:0043229	intracellular organelle	1524	81	61.01	0.00059	CC	evm.model.Contig10143.202;evm.model.Contig10143.214;evm.model.Contig10660.179;evm.model.Contig10660.193;evm.model.Contig11518.43;evm.model.Contig11642.1004;evm.model.Contig11642.1161;evm.model.Contig11642.1415_evm.model.Contig11642.1416;evm.model.Contig11642.1481;evm.model.Contig11642.1601;evm.model.Contig11642.1652;evm.model.Contig12381.123;evm.model.Contig12381.218;evm.model.Contig12381.402;evm…	0.0022433	0.1643
				GO:0030133	transport vesicle	19	5	0.76	0.00071	CC	evm.model.Contig2581.770;evm.model.Contig2712.1740;evm.model.Contig5386.46;evm.model.Contig7167.253;evm.model.Contig7167.496	0.00258589	0.010142
				GO:0030658	transport vesicle membrane	19	5	0.76	0.00071	CC	evm.model.Contig2581.770;evm.model.Contig2712.1740;evm.model.Contig5386.46;evm.model.Contig7167.253;evm.model.Contig7167.496	0.00258589	0.010142
				GO:0031981	nuclear lumen	68	9	2.72	0.00136	CC	evm.model.Contig11642.1161;evm.model.Contig12381.402;evm.model.Contig16184.46;evm.model.Contig2581.600;evm.model.Contig2712.1482;evm.model.Contig2712.321;evm.model.Contig5252.523;evm.model.Contig5387.382;evm.model.Contig7167.262	0.00435704	0.0182556
				GO:0032991	protein-containing complex	1102	60	44.11	0.00314	CC	evm.model.Contig10143.685;evm.model.Contig10143.813;evm.model.Contig10660.554;evm.model.Contig11642.1161;evm.model.Contig11642.1601;evm.model.Contig11642.1652;evm.model.Contig12381.123;evm.model.Contig12381.402;evm.model.Contig12381.43;evm.model.Contig12381.647;evm.model.Contig14326.187;evm.model.Contig14326.753;evm.model.Contig14326.895;evm.model.Contig16184.46;evm.model.Contig16184.51;evm.model…	0.00905367	0.121704
				GO:0031974	membrane-enclosed lumen	78	9	3.12	0.00357	CC	evm.model.Contig11642.1161;evm.model.Contig12381.402;evm.model.Contig16184.46;evm.model.Contig2581.600;evm.model.Contig2712.1482;evm.model.Contig2712.321;evm.model.Contig5252.523;evm.model.Contig5387.382;evm.model.Contig7167.262	0.0100424	0.0182556
				GO:0043233	organelle lumen	78	9	3.12	0.00357	CC	evm.model.Contig11642.1161;evm.model.Contig12381.402;evm.model.Contig16184.46;evm.model.Contig2581.600;evm.model.Contig2712.1482;evm.model.Contig2712.321;evm.model.Contig5252.523;evm.model.Contig5387.382;evm.model.Contig7167.262	0.0100424	0.0182556
				GO:0070013	intracellular organelle lumen	78	9	3.12	0.00357	CC	evm.model.Contig11642.1161;evm.model.Contig12381.402;evm.model.Contig16184.46;evm.model.Contig2581.600;evm.model.Contig2712.1482;evm.model.Contig2712.321;evm.model.Contig5252.523;evm.model.Contig5387.382;evm.model.Contig7167.262	0.0100424	0.0182556
				GO:0005798	Golgi-associated vesicle	31	5	1.24	0.00704	CC	evm.model.Contig2581.770;evm.model.Contig2712.1740;evm.model.Contig5386.46;evm.model.Contig7167.253;evm.model.Contig7167.496	0.0183146	0.010142
				GO:0030660	Golgi-associated vesicle membrane	31	5	1.24	0.00704	CC	evm.model.Contig2581.770;evm.model.Contig2712.1740;evm.model.Contig5386.46;evm.model.Contig7167.253;evm.model.Contig7167.496	0.0183146	0.010142
				GO:0012505	endomembrane system	139	12	5.56	0.009	CC	evm.model.Contig10660.179;evm.model.Contig12381.647;evm.model.Contig2581.770;evm.model.Contig2712.1740;evm.model.Contig2712.1839;evm.model.Contig3098.29;evm.model.Contig5386.46;evm.model.Contig5482.282;evm.model.Contig6055.252;evm.model.Contig6055.414;evm.model.Contig7167.253;evm.model.Contig7167.496	0.0220008	0.0243408
				GO:0012506	vesicle membrane	33	5	1.32	0.00922	CC	evm.model.Contig2581.770;evm.model.Contig2712.1740;evm.model.Contig5386.46;evm.model.Contig7167.253;evm.model.Contig7167.496	0.0220008	0.010142
				GO:0030120	vesicle coat	33	5	1.32	0.00922	CC	evm.model.Contig2581.770;evm.model.Contig2712.1740;evm.model.Contig5386.46;evm.model.Contig7167.253;evm.model.Contig7167.496	0.0220008	0.010142
				GO:0030135	coated vesicle	33	5	1.32	0.00922	CC	evm.model.Contig2581.770;evm.model.Contig2712.1740;evm.model.Contig5386.46;evm.model.Contig7167.253;evm.model.Contig7167.496	0.0220008	0.010142
				GO:0030659	cytoplasmic vesicle membrane	33	5	1.32	0.00922	CC	evm.model.Contig2581.770;evm.model.Contig2712.1740;evm.model.Contig5386.46;evm.model.Contig7167.253;evm.model.Contig7167.496	0.0220008	0.010142
				GO:0030662	coated vesicle membrane	33	5	1.32	0.00922	CC	evm.model.Contig2581.770;evm.model.Contig2712.1740;evm.model.Contig5386.46;evm.model.Contig7167.253;evm.model.Contig7167.496	0.0220008	0.010142
				GO:0031410	cytoplasmic vesicle	33	5	1.32	0.00922	CC	evm.model.Contig2581.770;evm.model.Contig2712.1740;evm.model.Contig5386.46;evm.model.Contig7167.253;evm.model.Contig7167.496	0.0220008	0.010142
				GO:0031982	vesicle	33	5	1.32	0.00922	CC	evm.model.Contig2581.770;evm.model.Contig2712.1740;evm.model.Contig5386.46;evm.model.Contig7167.253;evm.model.Contig7167.496	0.0220008	0.010142
				GO:0044433	cytoplasmic vesicle part	33	5	1.32	0.00922	CC	evm.model.Contig2581.770;evm.model.Contig2712.1740;evm.model.Contig5386.46;evm.model.Contig7167.253;evm.model.Contig7167.496	0.0220008	0.010142
				GO:0097708	intracellular vesicle	33	5	1.32	0.00922	CC	evm.model.Contig2581.770;evm.model.Contig2712.1740;evm.model.Contig5386.46;evm.model.Contig7167.253;evm.model.Contig7167.496	0.0220008	0.010142
				GO:0098796	membrane protein complex	152	12	6.08	0.01754	CC	evm.model.Contig2581.770;evm.model.Contig2712.1740;evm.model.Contig2712.271;evm.model.Contig3098.160;evm.model.Contig5373.570;evm.model.Contig5386.46;evm.model.Contig5482.282;evm.model.Contig5483.805;evm.model.Contig6055.252;evm.model.Contig7167.253;evm.model.Contig7167.257;evm.model.Contig7167.496	0.0384104	0.0243408
				GO:0004386	helicase activity	161	35	5.8	3.8e-18	MF	evm.model.Contig10143.802;evm.model.Contig10660.653;evm.model.Contig11642.1095;evm.model.Contig12381.218;evm.model.Contig12381.411;evm.model.Contig14326.588;evm.model.Contig16184.51;evm.model.Contig2581.276;evm.model.Contig2581.519;evm.model.Contig2685.1102;evm.model.Contig2685.1124;evm.model.Contig2712.103;evm.model.Contig2712.1498;evm.model.Contig2712.1814;evm.model.Contig2712.1867;evm.model.Co…	6.574e-16	0.0709939
				GO:0016462	pyrophosphatase activity	754	69	27.18	3.9e-13	MF	evm.model.Contig10143.802;evm.model.Contig10660.238;evm.model.Contig10660.653;evm.model.Contig11642.1095;evm.model.Contig11642.1105;evm.model.Contig11642.1481;evm.model.Contig11642.1652;evm.model.Contig11642.575;evm.model.Contig12381.123;evm.model.Contig12381.218;evm.model.Contig12381.298;evm.model.Contig12381.411;evm.model.Contig12381.43;evm.model.Contig12381.581;evm.model.Contig14326.588;evm.mo…	1.5224e-11	0.139959
				GO:0017111	nucleoside-triphosphatase activity	738	68	26.6	4.3e-13	MF	evm.model.Contig10143.802;evm.model.Contig10660.238;evm.model.Contig10660.653;evm.model.Contig11642.1095;evm.model.Contig11642.1105;evm.model.Contig11642.1481;evm.model.Contig11642.1652;evm.model.Contig11642.575;evm.model.Contig12381.123;evm.model.Contig12381.218;evm.model.Contig12381.298;evm.model.Contig12381.411;evm.model.Contig12381.43;evm.model.Contig12381.581;evm.model.Contig14326.588;evm.mo…	1.5224e-11	0.137931
				GO:0016817	hydrolase activity, acting on acid anhydrides	756	69	27.25	4.4e-13	MF	evm.model.Contig10143.802;evm.model.Contig10660.238;evm.model.Contig10660.653;evm.model.Contig11642.1095;evm.model.Contig11642.1105;evm.model.Contig11642.1481;evm.model.Contig11642.1652;evm.model.Contig11642.575;evm.model.Contig12381.123;evm.model.Contig12381.218;evm.model.Contig12381.298;evm.model.Contig12381.411;evm.model.Contig12381.43;evm.model.Contig12381.581;evm.model.Contig14326.588;evm.mo…	1.5224e-11	0.139959
				GO:0016818	hydrolase activity, acting on acid anhydrides, in phosphorus-containing anhydrides	756	69	27.25	4.4e-13	MF	evm.model.Contig10143.802;evm.model.Contig10660.238;evm.model.Contig10660.653;evm.model.Contig11642.1095;evm.model.Contig11642.1105;evm.model.Contig11642.1481;evm.model.Contig11642.1652;evm.model.Contig11642.575;evm.model.Contig12381.123;evm.model.Contig12381.218;evm.model.Contig12381.298;evm.model.Contig12381.411;evm.model.Contig12381.43;evm.model.Contig12381.581;evm.model.Contig14326.588;evm.mo…	1.5224e-11	0.139959
				GO:0005515	protein binding	2891	158	104.22	2.2e-09	MF	evm.model.Contig10143.1051;evm.model.Contig10143.1112;evm.model.Contig10143.1131;evm.model.Contig10143.1166;evm.model.Contig10143.18;evm.model.Contig10143.202;evm.model.Contig10143.214;evm.model.Contig10143.278;evm.model.Contig10143.798;evm.model.Contig10143.939;evm.model.Contig10440.49;evm.model.Contig10660.299;evm.model.Contig10660.554;evm.model.Contig10660.87;evm.model.Contig11518.109;evm.mode…	5.07467e-08	0.320487
				GO:0005488	binding	8032	341	289.55	7.7e-09	MF	evm.model.Contig10143.1051;evm.model.Contig10143.1112;evm.model.Contig10143.1131;evm.model.Contig10143.1166;evm.model.Contig10143.1301;evm.model.Contig10143.18;evm.model.Contig10143.202;evm.model.Contig10143.214;evm.model.Contig10143.278;evm.model.Contig10143.279;evm.model.Contig10143.343;evm.model.Contig10143.798;evm.model.Contig10143.802;evm.model.Contig10143.939;evm.model.Contig10440.49;evm.mo…	1.66512e-07	0.691684
				GO:0003676	nucleic acid binding	1807	109	65.14	1.4e-08	MF	evm.model.Contig10143.1166;evm.model.Contig10143.1301;evm.model.Contig10143.279;evm.model.Contig10143.802;evm.model.Contig10660.364;evm.model.Contig10660.399;evm.model.Contig10660.653;evm.model.Contig11518.111;evm.model.Contig11642.1095;evm.model.Contig11642.1117;evm.model.Contig11642.1194;evm.model.Contig11642.1355;evm.model.Contig11642.1466;evm.model.Contig11642.1565;evm.model.Contig11642.1622;…	2.84941e-07	0.221095
				GO:0042623	ATPase activity, coupled	194	25	6.99	3e-08	MF	evm.model.Contig10143.802;evm.model.Contig11642.1105;evm.model.Contig12381.218;evm.model.Contig14326.588;evm.model.Contig2581.607;evm.model.Contig2581.608;evm.model.Contig2685.934;evm.model.Contig2712.103;evm.model.Contig2712.1498;evm.model.Contig2712.1814;evm.model.Contig2712.1867;evm.model.Contig2712.2016;evm.model.Contig29751.182;evm.model.Contig3094.12;evm.model.Contig3098.183;evm.model.Conti…	5.46316e-07	0.0507099
				GO:0003678	DNA helicase activity	23	9	0.83	4.9e-08	MF	evm.model.Contig12381.218;evm.model.Contig16184.51;evm.model.Contig2685.1102;evm.model.Contig2685.1124;evm.model.Contig29751.182;evm.model.Contig3094.12;evm.model.Contig3098.183;evm.model.Contig3230.165;evm.model.Contig6055.11	8.477e-07	0.0182556
				GO:0140098	catalytic activity, acting on RNA	189	23	6.81	3.1e-07	MF	evm.model.Contig10143.429;evm.model.Contig10660.364;evm.model.Contig10660.399;evm.model.Contig10660.538;evm.model.Contig2581.142;evm.model.Contig2581.907;evm.model.Contig2685.204;evm.model.Contig2685.56;evm.model.Contig2685.657;evm.model.Contig2712.454;evm.model.Contig2800.135;evm.model.Contig5373.298;evm.model.Contig5373.381;evm.model.Contig5386.31;evm.model.Contig5483.547;evm.model.Contig75.20;…	4.46917e-06	0.0466531
				GO:0140097	catalytic activity, acting on DNA	85	15	3.06	3.1e-07	MF	evm.model.Contig11642.1622;evm.model.Contig12381.218;evm.model.Contig16184.51;evm.model.Contig2685.1102;evm.model.Contig2685.1124;evm.model.Contig2685.470;evm.model.Contig2712.734;evm.model.Contig29751.182;evm.model.Contig3094.12;evm.model.Contig3098.131;evm.model.Contig3098.183;evm.model.Contig3230.165;evm.model.Contig5483.275;evm.model.Contig6055.11;evm.model.Contig8624.295	4.46917e-06	0.030426
				GO:0008026	ATP-dependent helicase activity	102	16	3.68	6.8e-07	MF	evm.model.Contig10143.802;evm.model.Contig12381.218;evm.model.Contig14326.588;evm.model.Contig2712.103;evm.model.Contig2712.1498;evm.model.Contig2712.1814;evm.model.Contig2712.1867;evm.model.Contig2712.2016;evm.model.Contig29751.182;evm.model.Contig3094.12;evm.model.Contig3098.183;evm.model.Contig5387.47;evm.model.Contig8573.92;evm.model.Contig9220.623;evm.model.Contig9868.469;evm.model.Contig986…	9.04923e-06	0.0324544
				GO:0070035	purine NTP-dependent helicase activity	102	16	3.68	6.8e-07	MF	evm.model.Contig10143.802;evm.model.Contig12381.218;evm.model.Contig14326.588;evm.model.Contig2712.103;evm.model.Contig2712.1498;evm.model.Contig2712.1814;evm.model.Contig2712.1867;evm.model.Contig2712.2016;evm.model.Contig29751.182;evm.model.Contig3094.12;evm.model.Contig3098.183;evm.model.Contig5387.47;evm.model.Contig8573.92;evm.model.Contig9220.623;evm.model.Contig9868.469;evm.model.Contig986…	9.04923e-06	0.0324544
				GO:0016787	hydrolase activity	1770	100	63.81	1.6e-06	MF	evm.model.Contig10143.802;evm.model.Contig10440.65;evm.model.Contig10660.179;evm.model.Contig10660.238;evm.model.Contig10660.653;evm.model.Contig11642.1095;evm.model.Contig11642.1105;evm.model.Contig11642.1481;evm.model.Contig11642.1509;evm.model.Contig11642.1652;evm.model.Contig11642.355;evm.model.Contig11642.575;evm.model.Contig11642.813;evm.model.Contig12381.123;evm.model.Contig12381.218;evm.m…	1.67758e-05	0.20284
				GO:0016887	ATPase activity	328	30	11.82	2.7e-06	MF	evm.model.Contig10143.802;evm.model.Contig11642.1105;evm.model.Contig12381.218;evm.model.Contig14326.588;evm.model.Contig2581.513;evm.model.Contig2581.607;evm.model.Contig2581.608;evm.model.Contig2685.934;evm.model.Contig2712.103;evm.model.Contig2712.1498;evm.model.Contig2712.1814;evm.model.Contig2712.1867;evm.model.Contig2712.2016;evm.model.Contig2712.416;evm.model.Contig2800.480;evm.model.Conti…	2.66914e-05	0.0608519
				GO:0019899	enzyme binding	58	11	2.09	5.8e-06	MF	evm.model.Contig10660.554;evm.model.Contig12381.592;evm.model.Contig2685.881;evm.model.Contig2712.1482;evm.model.Contig29751.1;evm.model.Contig3364.299;evm.model.Contig3364.34;evm.model.Contig5386.878;evm.model.Contig8573.330;evm.model.Contig9220.1189;evm.model.Contig9867.411	5.42378e-05	0.0223124
				GO:0051020	GTPase binding	31	8	1.12	1e-05	MF	evm.model.Contig2685.881;evm.model.Contig29751.1;evm.model.Contig3364.299;evm.model.Contig3364.34;evm.model.Contig5386.878;evm.model.Contig8573.330;evm.model.Contig9220.1189;evm.model.Contig9867.411	8.04651e-05	0.0162272
				GO:0035639	purine ribonucleoside triphosphate binding	1918	102	69.14	1.8e-05	MF	evm.model.Contig10143.343;evm.model.Contig10143.802;evm.model.Contig10660.238;evm.model.Contig10660.538;evm.model.Contig10660.653;evm.model.Contig11642.1095;evm.model.Contig11642.1206;evm.model.Contig11642.1481;evm.model.Contig11642.1622;evm.model.Contig11642.1652;evm.model.Contig11642.453;evm.model.Contig11642.56;evm.model.Contig11642.575;evm.model.Contig11642.897;evm.model.Contig12381.123;evm.m…	0.000132511	0.206897
				GO:0005524	ATP binding	1685	92	60.74	1.9e-05	MF	evm.model.Contig10143.343;evm.model.Contig10143.802;evm.model.Contig10660.538;evm.model.Contig10660.653;evm.model.Contig11642.1095;evm.model.Contig11642.1206;evm.model.Contig11642.1622;evm.model.Contig11642.1652;evm.model.Contig11642.453;evm.model.Contig11642.56;evm.model.Contig11642.575;evm.model.Contig11642.897;evm.model.Contig12381.123;evm.model.Contig12381.218;evm.model.Contig12381.298;evm.mo…	0.000136958	0.186613
				GO:0097367	carbohydrate derivative binding	2002	105	72.17	2.4e-05	MF	evm.model.Contig10143.343;evm.model.Contig10143.802;evm.model.Contig10660.238;evm.model.Contig10660.538;evm.model.Contig10660.653;evm.model.Contig11642.1095;evm.model.Contig11642.1206;evm.model.Contig11642.1481;evm.model.Contig11642.1622;evm.model.Contig11642.1652;evm.model.Contig11642.453;evm.model.Contig11642.56;evm.model.Contig11642.575;evm.model.Contig11642.897;evm.model.Contig12381.123;evm.m…	0.000162823	0.212982
				GO:0032555	purine ribonucleotide binding	1958	103	70.58	2.6e-05	MF	evm.model.Contig10143.343;evm.model.Contig10143.802;evm.model.Contig10660.238;evm.model.Contig10660.538;evm.model.Contig10660.653;evm.model.Contig11642.1095;evm.model.Contig11642.1206;evm.model.Contig11642.1481;evm.model.Contig11642.1622;evm.model.Contig11642.1652;evm.model.Contig11642.453;evm.model.Contig11642.56;evm.model.Contig11642.575;evm.model.Contig11642.897;evm.model.Contig12381.123;evm.m…	0.000166593	0.208925
				GO:0008144	drug binding	1769	95	63.77	2.6e-05	MF	evm.model.Contig10143.343;evm.model.Contig10143.802;evm.model.Contig10660.538;evm.model.Contig10660.653;evm.model.Contig11642.1095;evm.model.Contig11642.1206;evm.model.Contig11642.1622;evm.model.Contig11642.1652;evm.model.Contig11642.453;evm.model.Contig11642.56;evm.model.Contig11642.575;evm.model.Contig11642.897;evm.model.Contig12381.123;evm.model.Contig12381.218;evm.model.Contig12381.298;evm.mo…	0.000166593	0.192698
				GO:0032559	adenyl ribonucleotide binding	1725	93	62.18	2.8e-05	MF	evm.model.Contig10143.343;evm.model.Contig10143.802;evm.model.Contig10660.538;evm.model.Contig10660.653;evm.model.Contig11642.1095;evm.model.Contig11642.1206;evm.model.Contig11642.1622;evm.model.Contig11642.1652;evm.model.Contig11642.453;evm.model.Contig11642.56;evm.model.Contig11642.575;evm.model.Contig11642.897;evm.model.Contig12381.123;evm.model.Contig12381.218;evm.model.Contig12381.298;evm.mo…	0.000173	0.188641
				GO:0032553	ribonucleotide binding	1984	103	71.52	4.5e-05	MF	evm.model.Contig10143.343;evm.model.Contig10143.802;evm.model.Contig10660.238;evm.model.Contig10660.538;evm.model.Contig10660.653;evm.model.Contig11642.1095;evm.model.Contig11642.1206;evm.model.Contig11642.1481;evm.model.Contig11642.1622;evm.model.Contig11642.1652;evm.model.Contig11642.453;evm.model.Contig11642.56;evm.model.Contig11642.575;evm.model.Contig11642.897;evm.model.Contig12381.123;evm.m…	0.000268448	0.208925
				GO:0008173	RNA methyltransferase activity	28	7	1.01	4.6e-05	MF	evm.model.Contig10660.364;evm.model.Contig2685.657;evm.model.Contig2712.454;evm.model.Contig2800.135;evm.model.Contig8573.190;evm.model.Contig9220.429;evm.model.Contig9867.687	0.000269763	0.0141988
				GO:0016779	nucleotidyltransferase activity	126	15	4.54	4.7e-05	MF	evm.model.Contig10143.1220;evm.model.Contig10660.188;evm.model.Contig10660.189;evm.model.Contig10660.399;evm.model.Contig2581.142;evm.model.Contig2685.470;evm.model.Contig2685.56;evm.model.Contig2712.734;evm.model.Contig5373.298;evm.model.Contig5387.372;evm.model.Contig5482.290;evm.model.Contig5483.547;evm.model.Contig8624.295;evm.model.Contig9220.57;evm.model.Contig9867.840	0.000271033	0.030426
				GO:0030554	adenyl nucleotide binding	1764	93	63.59	6.7e-05	MF	evm.model.Contig10143.343;evm.model.Contig10143.802;evm.model.Contig10660.538;evm.model.Contig10660.653;evm.model.Contig11642.1095;evm.model.Contig11642.1206;evm.model.Contig11642.1622;evm.model.Contig11642.1652;evm.model.Contig11642.453;evm.model.Contig11642.56;evm.model.Contig11642.575;evm.model.Contig11642.897;evm.model.Contig12381.123;evm.model.Contig12381.218;evm.model.Contig12381.298;evm.mo…	0.000379484	0.188641
				GO:0017076	purine nucleotide binding	2004	103	72.24	6.8e-05	MF	evm.model.Contig10143.343;evm.model.Contig10143.802;evm.model.Contig10660.238;evm.model.Contig10660.538;evm.model.Contig10660.653;evm.model.Contig11642.1095;evm.model.Contig11642.1206;evm.model.Contig11642.1481;evm.model.Contig11642.1622;evm.model.Contig11642.1652;evm.model.Contig11642.453;evm.model.Contig11642.56;evm.model.Contig11642.575;evm.model.Contig11642.897;evm.model.Contig12381.123;evm.m…	0.000379484	0.208925
				GO:0000166	nucleotide binding	2250	110	81.11	0.00028	MF	evm.model.Contig10143.343;evm.model.Contig10143.802;evm.model.Contig10660.238;evm.model.Contig10660.538;evm.model.Contig10660.653;evm.model.Contig11642.1095;evm.model.Contig11642.1105;evm.model.Contig11642.1206;evm.model.Contig11642.1481;evm.model.Contig11642.1622;evm.model.Contig11642.1652;evm.model.Contig11642.453;evm.model.Contig11642.56;evm.model.Contig11642.575;evm.model.Contig11642.897;evm.…	0.00124205	0.223124
				GO:1901265	nucleoside phosphate binding	2250	110	81.11	0.00028	MF	evm.model.Contig10143.343;evm.model.Contig10143.802;evm.model.Contig10660.238;evm.model.Contig10660.538;evm.model.Contig10660.653;evm.model.Contig11642.1095;evm.model.Contig11642.1105;evm.model.Contig11642.1206;evm.model.Contig11642.1481;evm.model.Contig11642.1622;evm.model.Contig11642.1652;evm.model.Contig11642.453;evm.model.Contig11642.56;evm.model.Contig11642.575;evm.model.Contig11642.897;evm.…	0.00124205	0.223124
				GO:0140101	catalytic activity, acting on a tRNA	88	11	3.17	0.00031	MF	evm.model.Contig10143.429;evm.model.Contig10660.364;evm.model.Contig10660.538;evm.model.Contig2581.907;evm.model.Contig2685.204;evm.model.Contig2712.454;evm.model.Contig5373.381;evm.model.Contig5386.31;evm.model.Contig75.20;evm.model.Contig8573.20;evm.model.Contig9220.429	0.00134075	0.0223124
				GO:0036094	small molecule binding	2380	115	85.8	0.00031	MF	evm.model.Contig10143.343;evm.model.Contig10143.802;evm.model.Contig10660.238;evm.model.Contig10660.538;evm.model.Contig10660.653;evm.model.Contig11642.1095;evm.model.Contig11642.1105;evm.model.Contig11642.1206;evm.model.Contig11642.1481;evm.model.Contig11642.1622;evm.model.Contig11642.1652;evm.model.Contig11642.453;evm.model.Contig11642.56;evm.model.Contig11642.575;evm.model.Contig11642.897;evm.…	0.00134075	0.233266
				GO:1901363	heterocyclic compound binding	4164	184	150.11	0.00032	MF	evm.model.Contig10143.1166;evm.model.Contig10143.1301;evm.model.Contig10143.279;evm.model.Contig10143.343;evm.model.Contig10143.802;evm.model.Contig10660.238;evm.model.Contig10660.364;evm.model.Contig10660.399;evm.model.Contig10660.538;evm.model.Contig10660.653;evm.model.Contig11518.111;evm.model.Contig11642.1095;evm.model.Contig11642.1105;evm.model.Contig11642.1117;evm.model.Contig11642.1194;evm…	0.00136691	0.373225
				GO:0097159	organic cyclic compound binding	4166	184	150.18	0.00033	MF	evm.model.Contig10143.1166;evm.model.Contig10143.1301;evm.model.Contig10143.279;evm.model.Contig10143.343;evm.model.Contig10143.802;evm.model.Contig10660.238;evm.model.Contig10660.364;evm.model.Contig10660.399;evm.model.Contig10660.538;evm.model.Contig10660.653;evm.model.Contig11518.111;evm.model.Contig11642.1095;evm.model.Contig11642.1105;evm.model.Contig11642.1117;evm.model.Contig11642.1194;evm…	0.00139244	0.373225
				GO:0043168	anion binding	2270	110	81.83	0.0004	MF	evm.model.Contig10143.343;evm.model.Contig10143.802;evm.model.Contig10660.238;evm.model.Contig10660.538;evm.model.Contig10660.653;evm.model.Contig11642.1095;evm.model.Contig11642.1206;evm.model.Contig11642.1481;evm.model.Contig11642.1622;evm.model.Contig11642.1652;evm.model.Contig11642.453;evm.model.Contig11642.56;evm.model.Contig11642.575;evm.model.Contig11642.897;evm.model.Contig12381.123;evm.m…	0.00159081	0.223124
				GO:0019829	cation-transporting ATPase activity	58	8	2.09	0.00105	MF	evm.model.Contig11642.1105;evm.model.Contig2581.607;evm.model.Contig2581.608;evm.model.Contig2685.934;evm.model.Contig5252.341;evm.model.Contig5386.95;evm.model.Contig75.291;evm.model.Contig9868.691	0.00352718	0.0162272
				GO:0022853	active ion transmembrane transporter activity	58	8	2.09	0.00105	MF	evm.model.Contig11642.1105;evm.model.Contig2581.607;evm.model.Contig2581.608;evm.model.Contig2685.934;evm.model.Contig5252.341;evm.model.Contig5386.95;evm.model.Contig75.291;evm.model.Contig9868.691	0.00352718	0.0162272
				GO:0042625	ATPase coupled ion transmembrane transporter activity	58	8	2.09	0.00105	MF	evm.model.Contig11642.1105;evm.model.Contig2581.607;evm.model.Contig2581.608;evm.model.Contig2685.934;evm.model.Contig5252.341;evm.model.Contig5386.95;evm.model.Contig75.291;evm.model.Contig9868.691	0.00352718	0.0162272
				GO:0042626	ATPase activity, coupled to transmembrane movement of substances	58	8	2.09	0.00105	MF	evm.model.Contig11642.1105;evm.model.Contig2581.607;evm.model.Contig2581.608;evm.model.Contig2685.934;evm.model.Contig5252.341;evm.model.Contig5386.95;evm.model.Contig75.291;evm.model.Contig9868.691	0.00352718	0.0162272
				GO:0043492	ATPase activity, coupled to movement of substances	61	8	2.2	0.00147	MF	evm.model.Contig11642.1105;evm.model.Contig2581.607;evm.model.Contig2581.608;evm.model.Contig2685.934;evm.model.Contig5252.341;evm.model.Contig5386.95;evm.model.Contig75.291;evm.model.Contig9868.691	0.00466624	0.0162272
				GO:0003677	DNA binding	1022	55	36.84	0.00163	MF	evm.model.Contig10143.1166;evm.model.Contig10143.1301;evm.model.Contig10143.279;evm.model.Contig10660.399;evm.model.Contig10660.653;evm.model.Contig11518.111;evm.model.Contig11642.1095;evm.model.Contig11642.1355;evm.model.Contig11642.1622;evm.model.Contig11642.415;evm.model.Contig11642.575;evm.model.Contig12381.218;evm.model.Contig12381.300;evm.model.Contig12381.411;evm.model.Contig16184.51;evm.m…	0.00512709	0.111562
				GO:0015399	primary active transmembrane transporter activity	65	8	2.34	0.00223	MF	evm.model.Contig11642.1105;evm.model.Contig2581.607;evm.model.Contig2581.608;evm.model.Contig2685.934;evm.model.Contig5252.341;evm.model.Contig5386.95;evm.model.Contig75.291;evm.model.Contig9868.691	0.00665155	0.0162272
				GO:0015405	P-P-bond-hydrolysis-driven transmembrane transporter activity	65	8	2.34	0.00223	MF	evm.model.Contig11642.1105;evm.model.Contig2581.607;evm.model.Contig2581.608;evm.model.Contig2685.934;evm.model.Contig5252.341;evm.model.Contig5386.95;evm.model.Contig75.291;evm.model.Contig9868.691	0.00665155	0.0162272
				GO:0004812	aminoacyl-tRNA ligase activity	58	7	2.09	0.00463	MF	evm.model.Contig10660.538;evm.model.Contig2581.907;evm.model.Contig2685.204;evm.model.Contig5373.381;evm.model.Contig5386.31;evm.model.Contig75.20;evm.model.Contig8573.20	0.0124184	0.0141988
				GO:0016875	ligase activity, forming carbon-oxygen bonds	58	7	2.09	0.00463	MF	evm.model.Contig10660.538;evm.model.Contig2581.907;evm.model.Contig2685.204;evm.model.Contig5373.381;evm.model.Contig5386.31;evm.model.Contig75.20;evm.model.Contig8573.20	0.0124184	0.0141988
				GO:0003899	DNA-directed 5'-3' RNA polymerase activity	50	6	1.8	0.0088	MF	evm.model.Contig10660.399;evm.model.Contig2581.142;evm.model.Contig2685.56;evm.model.Contig5373.298;evm.model.Contig5483.547;evm.model.Contig9220.57	0.0220008	0.0121704
				GO:0008270	zinc ion binding	923	47	33.27	0.00981	MF	evm.model.Contig10143.1112;evm.model.Contig10143.202;evm.model.Contig10660.558;evm.model.Contig11642.1415_evm.model.Contig11642.1416;evm.model.Contig12381.299;evm.model.Contig14326.1109;evm.model.Contig14326.260;evm.model.Contig2581.275;evm.model.Contig2581.276;evm.model.Contig2581.470;evm.model.Contig2581.585;evm.model.Contig2581.834;evm.model.Contig2581.912;evm.model.Contig2685.445;evm.model.Co…	0.0230902	0.0953347
				GO:0003723	RNA binding	378	23	13.63	0.01002	MF	evm.model.Contig10143.1166;evm.model.Contig10143.802;evm.model.Contig10660.364;evm.model.Contig2685.1072;evm.model.Contig2712.1177;evm.model.Contig2712.1961;evm.model.Contig2712.605;evm.model.Contig2800.135;evm.model.Contig29751.201;evm.model.Contig5252.1325;evm.model.Contig5252.232;evm.model.Contig5252.932;evm.model.Contig5373.56;evm.model.Contig5387.372;evm.model.Contig5482.290;evm.model.Contig…	0.0232679	0.0466531
				GO:0034062	5'-3' RNA polymerase activity	56	6	2.02	0.01502	MF	evm.model.Contig10660.399;evm.model.Contig2581.142;evm.model.Contig2685.56;evm.model.Contig5373.298;evm.model.Contig5483.547;evm.model.Contig9220.57	0.0333136	0.0121704
				GO:0097747	RNA polymerase activity	56	6	2.02	0.01502	MF	evm.model.Contig10660.399;evm.model.Contig2581.142;evm.model.Contig2685.56;evm.model.Contig5373.298;evm.model.Contig5483.547;evm.model.Contig9220.57	0.0333136	0.0121704
				GO:0043167	ion binding	4084	168	147.22	0.01818	MF	evm.model.Contig10143.1112;evm.model.Contig10143.202;evm.model.Contig10143.343;evm.model.Contig10143.802;evm.model.Contig10660.238;evm.model.Contig10660.538;evm.model.Contig10660.558;evm.model.Contig10660.653;evm.model.Contig11642.1095;evm.model.Contig11642.1105;evm.model.Contig11642.1206;evm.model.Contig11642.1415_evm.model.Contig11642.1416;evm.model.Contig11642.1481;evm.model.Contig11642.1622;e…	0.0393143	0.340771
				GO:0034641	cellular nitrogen compound metabolic process	1309	77	40.1	2.1e-09	BP	evm.model.Contig10143.214;evm.model.Contig10143.429;evm.model.Contig10660.364;evm.model.Contig10660.518;evm.model.Contig10660.538;evm.model.Contig11518.43;evm.model.Contig11642.1601;evm.model.Contig11642.1622;evm.model.Contig11642.56;evm.model.Contig11642.575;evm.model.Contig11642.957;evm.model.Contig12381.218;evm.model.Contig12381.402;evm.model.Contig14326.187;evm.model.Contig14326.260;evm.model…	5.07467e-08	0.156187
				GO:0006259	DNA metabolic process	195	23	5.97	2.3e-08	BP	evm.model.Contig10660.518;evm.model.Contig11518.43;evm.model.Contig11642.1622;evm.model.Contig11642.575;evm.model.Contig12381.218;evm.model.Contig14326.260;evm.model.Contig16184.51;evm.model.Contig2685.1102;evm.model.Contig2685.1124;evm.model.Contig2685.470;evm.model.Contig2685.89;evm.model.Contig2712.734;evm.model.Contig29751.182;evm.model.Contig3094.12;evm.model.Contig3098.131;evm.model.Contig3…	4.42111e-07	0.0466531
				GO:0044238	primary metabolic process	3798	156	116.35	1.3e-07	BP	evm.model.Contig10143.202;evm.model.Contig10143.214;evm.model.Contig10143.343;evm.model.Contig10143.429;evm.model.Contig10143.579;evm.model.Contig10143.967;evm.model.Contig10440.65;evm.model.Contig10660.179;evm.model.Contig10660.364;evm.model.Contig10660.518;evm.model.Contig10660.538;evm.model.Contig10660.554;evm.model.Contig11518.43;evm.model.Contig11518.53;evm.model.Contig11642.1104;evm.model.C…	2.14191e-06	0.31643
				GO:0006396	RNA processing	154	19	4.72	2e-07	BP	evm.model.Contig10143.214;evm.model.Contig10143.429;evm.model.Contig10660.364;evm.model.Contig14326.604;evm.model.Contig2581.704;evm.model.Contig2685.657;evm.model.Contig2712.300;evm.model.Contig2712.605;evm.model.Contig2800.135;evm.model.Contig3098.216;evm.model.Contig5387.264;evm.model.Contig5387.382;evm.model.Contig8573.190;evm.model.Contig9220.429;evm.model.Contig9220.669;evm.model.Contig9867…	3.14546e-06	0.0385395
				GO:0034660	ncRNA metabolic process	122	16	3.74	8.3e-07	BP	evm.model.Contig10143.429;evm.model.Contig10660.364;evm.model.Contig10660.538;evm.model.Contig2581.907;evm.model.Contig2685.204;evm.model.Contig2685.657;evm.model.Contig2712.300;evm.model.Contig3098.216;evm.model.Contig5373.381;evm.model.Contig5386.31;evm.model.Contig5387.264;evm.model.Contig75.20;evm.model.Contig8573.190;evm.model.Contig8573.20;evm.model.Contig9220.429;evm.model.Contig9867.775	1.02564e-05	0.0324544
				GO:0006270	DNA replication initiation	8	5	0.25	1.3e-06	BP	evm.model.Contig16184.51;evm.model.Contig2685.1102;evm.model.Contig2685.1124;evm.model.Contig3230.165;evm.model.Contig6055.11	1.45097e-05	0.010142
				GO:0071704	organic substance metabolic process	4058	160	124.31	1.6e-06	BP	evm.model.Contig10143.202;evm.model.Contig10143.214;evm.model.Contig10143.343;evm.model.Contig10143.429;evm.model.Contig10143.579;evm.model.Contig10143.967;evm.model.Contig10440.65;evm.model.Contig10660.179;evm.model.Contig10660.364;evm.model.Contig10660.518;evm.model.Contig10660.538;evm.model.Contig10660.554;evm.model.Contig11518.43;evm.model.Contig11518.53;evm.model.Contig11642.1104;evm.model.C…	1.67758e-05	0.324544
				GO:0006261	DNA-dependent DNA replication	9	5	0.28	3e-06	BP	evm.model.Contig16184.51;evm.model.Contig2685.1102;evm.model.Contig2685.1124;evm.model.Contig3230.165;evm.model.Contig6055.11	2.88333e-05	0.010142
				GO:0044237	cellular metabolic process	3355	136	102.78	8.5e-06	BP	evm.model.Contig10143.202;evm.model.Contig10143.214;evm.model.Contig10143.343;evm.model.Contig10143.429;evm.model.Contig10143.579;evm.model.Contig10143.967;evm.model.Contig10660.179;evm.model.Contig10660.364;evm.model.Contig10660.518;evm.model.Contig10660.538;evm.model.Contig10660.554;evm.model.Contig11518.43;evm.model.Contig11518.53;evm.model.Contig11642.1104;evm.model.Contig11642.1601;evm.model…	7.62974e-05	0.275862
				GO:0044260	cellular macromolecule metabolic process	2103	95	64.42	9e-06	BP	evm.model.Contig10143.202;evm.model.Contig10143.343;evm.model.Contig10660.179;evm.model.Contig10660.518;evm.model.Contig10660.538;evm.model.Contig10660.554;evm.model.Contig11518.43;evm.model.Contig11518.53;evm.model.Contig11642.1104;evm.model.Contig11642.1601;evm.model.Contig11642.1622;evm.model.Contig11642.453;evm.model.Contig11642.575;evm.model.Contig11642.897;evm.model.Contig12381.218;evm.mode…	7.67951e-05	0.192698
				GO:0016192	vesicle-mediated transport	146	16	4.47	9.1e-06	BP	evm.model.Contig10143.685;evm.model.Contig2581.770;evm.model.Contig2712.1740;evm.model.Contig3098.160;evm.model.Contig5252.334;evm.model.Contig5252.801;evm.model.Contig5373.570;evm.model.Contig5386.46;evm.model.Contig5387.109;evm.model.Contig5387.5;evm.model.Contig5483.805;evm.model.Contig6055.252;evm.model.Contig6055.330;evm.model.Contig64.1;evm.model.Contig7167.253;evm.model.Contig7167.496	7.67951e-05	0.0324544
				GO:0006260	DNA replication	47	9	1.44	1e-05	BP	evm.model.Contig11642.575;evm.model.Contig16184.51;evm.model.Contig2685.1102;evm.model.Contig2685.1124;evm.model.Contig2685.89;evm.model.Contig2712.734;evm.model.Contig3094.12;evm.model.Contig3230.165;evm.model.Contig6055.11	8.04651e-05	0.0182556
				GO:0051641	cellular localization	276	23	8.46	1.1e-05	BP	evm.model.Contig10143.685;evm.model.Contig10143.967;evm.model.Contig12381.647;evm.model.Contig2581.770;evm.model.Contig2712.1740;evm.model.Contig3098.160;evm.model.Contig3364.299;evm.model.Contig3364.34;evm.model.Contig5252.334;evm.model.Contig5373.570;evm.model.Contig5386.46;evm.model.Contig5386.878;evm.model.Contig5387.109;evm.model.Contig5387.5;evm.model.Contig5483.805;evm.model.Contig5483.844…	8.65e-05	0.0466531
				GO:0006399	tRNA metabolic process	93	12	2.85	2.4e-05	BP	evm.model.Contig10143.429;evm.model.Contig10660.364;evm.model.Contig10660.538;evm.model.Contig2581.907;evm.model.Contig2685.204;evm.model.Contig2712.300;evm.model.Contig3098.216;evm.model.Contig5373.381;evm.model.Contig5386.31;evm.model.Contig75.20;evm.model.Contig8573.20;evm.model.Contig9220.429	0.000162823	0.0243408
				GO:0009057	macromolecule catabolic process	158	16	4.84	2.5e-05	BP	evm.model.Contig10660.554;evm.model.Contig11518.53;evm.model.Contig14326.498;evm.model.Contig16184.95;evm.model.Contig2685.1091;evm.model.Contig2685.39;evm.model.Contig2712.391;evm.model.Contig2712.859;evm.model.Contig2800.116;evm.model.Contig5252.1460;evm.model.Contig5252.883;evm.model.Contig5386.713;evm.model.Contig5387.372;evm.model.Contig9220.654;evm.model.Contig9867.34;evm.model.Contig9867.8…	0.000166346	0.0324544
				GO:0010467	gene expression	719	42	22.03	2.8e-05	BP	evm.model.Contig10143.214;evm.model.Contig10143.429;evm.model.Contig10660.364;evm.model.Contig10660.538;evm.model.Contig11642.1601;evm.model.Contig12381.402;evm.model.Contig14326.187;evm.model.Contig14326.604;evm.model.Contig2581.704;evm.model.Contig2581.907;evm.model.Contig2685.204;evm.model.Contig2685.348;evm.model.Contig2685.657;evm.model.Contig2712.1525;evm.model.Contig2712.1961;evm.model.Con…	0.000173	0.0851927
				GO:0006886	intracellular protein transport	219	19	6.71	3.9e-05	BP	evm.model.Contig10143.967;evm.model.Contig12381.647;evm.model.Contig2581.770;evm.model.Contig2712.1740;evm.model.Contig3098.160;evm.model.Contig3364.299;evm.model.Contig3364.34;evm.model.Contig5252.334;evm.model.Contig5373.570;evm.model.Contig5386.46;evm.model.Contig5386.878;evm.model.Contig5387.109;evm.model.Contig5483.805;evm.model.Contig5483.844;evm.model.Contig6055.252;evm.model.Contig6055.41…	0.000236737	0.0385395
				GO:0044265	cellular macromolecule catabolic process	121	13	3.71	7.9e-05	BP	evm.model.Contig10660.554;evm.model.Contig11518.53;evm.model.Contig14326.498;evm.model.Contig16184.95;evm.model.Contig2685.1091;evm.model.Contig2685.39;evm.model.Contig2712.391;evm.model.Contig2712.859;evm.model.Contig5252.883;evm.model.Contig5387.372;evm.model.Contig9220.654;evm.model.Contig9867.34;evm.model.Contig9867.840	0.000433873	0.0263692
				GO:0030163	protein catabolic process	124	13	3.8	0.0001	BP	evm.model.Contig10660.554;evm.model.Contig11518.53;evm.model.Contig14326.498;evm.model.Contig16184.95;evm.model.Contig2685.1091;evm.model.Contig2685.39;evm.model.Contig2712.391;evm.model.Contig2712.859;evm.model.Contig5252.1460;evm.model.Contig5252.883;evm.model.Contig5386.713;evm.model.Contig9220.654;evm.model.Contig9867.34	0.000540625	0.0263692
				GO:0034470	ncRNA processing	63	9	1.93	0.00011	BP	evm.model.Contig10143.429;evm.model.Contig10660.364;evm.model.Contig2685.657;evm.model.Contig2712.300;evm.model.Contig3098.216;evm.model.Contig5387.264;evm.model.Contig8573.190;evm.model.Contig9220.429;evm.model.Contig9867.775	0.000585538	0.0182556
				GO:0006511	ubiquitin-dependent protein catabolic process	94	11	2.88	0.00013	BP	evm.model.Contig10660.554;evm.model.Contig11518.53;evm.model.Contig14326.498;evm.model.Contig16184.95;evm.model.Contig2685.1091;evm.model.Contig2685.39;evm.model.Contig2712.391;evm.model.Contig2712.859;evm.model.Contig5252.883;evm.model.Contig9220.654;evm.model.Contig9867.34	0.000642571	0.0223124
				GO:0019941	modification-dependent protein catabolic process	94	11	2.88	0.00013	BP	evm.model.Contig10660.554;evm.model.Contig11518.53;evm.model.Contig14326.498;evm.model.Contig16184.95;evm.model.Contig2685.1091;evm.model.Contig2685.39;evm.model.Contig2712.391;evm.model.Contig2712.859;evm.model.Contig5252.883;evm.model.Contig9220.654;evm.model.Contig9867.34	0.000642571	0.0223124
				GO:0043632	modification-dependent macromolecule catabolic process	94	11	2.88	0.00013	BP	evm.model.Contig10660.554;evm.model.Contig11518.53;evm.model.Contig14326.498;evm.model.Contig16184.95;evm.model.Contig2685.1091;evm.model.Contig2685.39;evm.model.Contig2712.391;evm.model.Contig2712.859;evm.model.Contig5252.883;evm.model.Contig9220.654;evm.model.Contig9867.34	0.000642571	0.0223124
				GO:0046907	intracellular transport	240	19	7.35	0.00013	BP	evm.model.Contig10143.967;evm.model.Contig12381.647;evm.model.Contig2581.770;evm.model.Contig2712.1740;evm.model.Contig3098.160;evm.model.Contig3364.299;evm.model.Contig3364.34;evm.model.Contig5252.334;evm.model.Contig5373.570;evm.model.Contig5386.46;evm.model.Contig5386.878;evm.model.Contig5387.109;evm.model.Contig5483.805;evm.model.Contig5483.844;evm.model.Contig6055.252;evm.model.Contig6055.41…	0.000642571	0.0385395
				GO:0051649	establishment of localization in cell	240	19	7.35	0.00013	BP	evm.model.Contig10143.967;evm.model.Contig12381.647;evm.model.Contig2581.770;evm.model.Contig2712.1740;evm.model.Contig3098.160;evm.model.Contig3364.299;evm.model.Contig3364.34;evm.model.Contig5252.334;evm.model.Contig5373.570;evm.model.Contig5386.46;evm.model.Contig5386.878;evm.model.Contig5387.109;evm.model.Contig5483.805;evm.model.Contig5483.844;evm.model.Contig6055.252;evm.model.Contig6055.41…	0.000642571	0.0385395
				GO:0006281	DNA repair	111	12	3.4	0.00014	BP	evm.model.Contig10660.518;evm.model.Contig11518.43;evm.model.Contig11642.1622;evm.model.Contig12381.218;evm.model.Contig14326.260;evm.model.Contig2685.470;evm.model.Contig29751.182;evm.model.Contig3094.12;evm.model.Contig3098.131;evm.model.Contig5252.537;evm.model.Contig5373.118;evm.model.Contig9867.802	0.000682254	0.0243408
				GO:0034613	cellular protein localization	242	19	7.41	0.00015	BP	evm.model.Contig10143.967;evm.model.Contig12381.647;evm.model.Contig2581.770;evm.model.Contig2712.1740;evm.model.Contig3098.160;evm.model.Contig3364.299;evm.model.Contig3364.34;evm.model.Contig5252.334;evm.model.Contig5373.570;evm.model.Contig5386.46;evm.model.Contig5386.878;evm.model.Contig5387.109;evm.model.Contig5483.805;evm.model.Contig5483.844;evm.model.Contig6055.252;evm.model.Contig6055.41…	0.000692	0.0385395
				GO:0070727	cellular macromolecule localization	242	19	7.41	0.00015	BP	evm.model.Contig10143.967;evm.model.Contig12381.647;evm.model.Contig2581.770;evm.model.Contig2712.1740;evm.model.Contig3098.160;evm.model.Contig3364.299;evm.model.Contig3364.34;evm.model.Contig5252.334;evm.model.Contig5373.570;evm.model.Contig5386.46;evm.model.Contig5386.878;evm.model.Contig5387.109;evm.model.Contig5483.805;evm.model.Contig5483.844;evm.model.Contig6055.252;evm.model.Contig6055.41…	0.000692	0.0385395
				GO:0006974	cellular response to DNA damage stimulus	112	12	3.43	0.00015	BP	evm.model.Contig10660.518;evm.model.Contig11518.43;evm.model.Contig11642.1622;evm.model.Contig12381.218;evm.model.Contig14326.260;evm.model.Contig2685.470;evm.model.Contig29751.182;evm.model.Contig3094.12;evm.model.Contig3098.131;evm.model.Contig5252.537;evm.model.Contig5373.118;evm.model.Contig9867.802	0.000692	0.0243408
				GO:0033554	cellular response to stress	112	12	3.43	0.00015	BP	evm.model.Contig10660.518;evm.model.Contig11518.43;evm.model.Contig11642.1622;evm.model.Contig12381.218;evm.model.Contig14326.260;evm.model.Contig2685.470;evm.model.Contig29751.182;evm.model.Contig3094.12;evm.model.Contig3098.131;evm.model.Contig5252.537;evm.model.Contig5373.118;evm.model.Contig9867.802	0.000692	0.0243408
				GO:0016071	mRNA metabolic process	32	6	0.98	0.00036	BP	evm.model.Contig10143.214;evm.model.Contig2581.704;evm.model.Contig5387.372;evm.model.Contig9220.669;evm.model.Contig9867.840;evm.model.Contig9868.13	0.00146541	0.0121704
				GO:1901575	organic substance catabolic process	260	19	7.96	0.00038	BP	evm.model.Contig10660.554;evm.model.Contig11518.53;evm.model.Contig14326.498;evm.model.Contig14326.753;evm.model.Contig16184.95;evm.model.Contig2685.1091;evm.model.Contig2685.39;evm.model.Contig2712.391;evm.model.Contig2712.859;evm.model.Contig2800.116;evm.model.Contig5252.1460;evm.model.Contig5252.883;evm.model.Contig5386.713;evm.model.Contig5387.372;evm.model.Contig8624.802;evm.model.Contig9220…	0.00152884	0.0385395
				GO:0009987	cellular process	4336	158	132.83	0.00053	BP	evm.model.Contig10143.202;evm.model.Contig10143.214;evm.model.Contig10143.343;evm.model.Contig10143.429;evm.model.Contig10143.579;evm.model.Contig10143.685;evm.model.Contig10143.967;evm.model.Contig10440.33;evm.model.Contig10660.179;evm.model.Contig10660.364;evm.model.Contig10660.518;evm.model.Contig10660.538;evm.model.Contig10660.554;evm.model.Contig11518.43;evm.model.Contig11518.53;evm.model.Co…	0.00206045	0.320487
				GO:0044257	cellular protein catabolic process	114	11	3.49	0.00071	BP	evm.model.Contig10660.554;evm.model.Contig11518.53;evm.model.Contig14326.498;evm.model.Contig16184.95;evm.model.Contig2685.1091;evm.model.Contig2685.39;evm.model.Contig2712.391;evm.model.Contig2712.859;evm.model.Contig5252.883;evm.model.Contig9220.654;evm.model.Contig9867.34	0.00258589	0.0223124
				GO:0051603	proteolysis involved in cellular protein catabolic process	114	11	3.49	0.00071	BP	evm.model.Contig10660.554;evm.model.Contig11518.53;evm.model.Contig14326.498;evm.model.Contig16184.95;evm.model.Contig2685.1091;evm.model.Contig2685.39;evm.model.Contig2712.391;evm.model.Contig2712.859;evm.model.Contig5252.883;evm.model.Contig9220.654;evm.model.Contig9867.34	0.00258589	0.0223124
				GO:0015031	protein transport	297	20	9.1	0.00076	BP	evm.model.Contig10143.685;evm.model.Contig10143.967;evm.model.Contig12381.647;evm.model.Contig2581.770;evm.model.Contig2712.1740;evm.model.Contig3098.160;evm.model.Contig3364.299;evm.model.Contig3364.34;evm.model.Contig5252.334;evm.model.Contig5373.570;evm.model.Contig5386.46;evm.model.Contig5386.878;evm.model.Contig5387.109;evm.model.Contig5483.805;evm.model.Contig5483.844;evm.model.Contig6055.2…	0.00273917	0.0405679
				GO:0015833	peptide transport	299	20	9.16	0.00082	BP	evm.model.Contig10143.685;evm.model.Contig10143.967;evm.model.Contig12381.647;evm.model.Contig2581.770;evm.model.Contig2712.1740;evm.model.Contig3098.160;evm.model.Contig3364.299;evm.model.Contig3364.34;evm.model.Contig5252.334;evm.model.Contig5373.570;evm.model.Contig5386.46;evm.model.Contig5386.878;evm.model.Contig5387.109;evm.model.Contig5483.805;evm.model.Contig5483.844;evm.model.Contig6055.2…	0.0028951	0.0405679
				GO:0042886	amide transport	299	20	9.16	0.00082	BP	evm.model.Contig10143.685;evm.model.Contig10143.967;evm.model.Contig12381.647;evm.model.Contig2581.770;evm.model.Contig2712.1740;evm.model.Contig3098.160;evm.model.Contig3364.299;evm.model.Contig3364.34;evm.model.Contig5252.334;evm.model.Contig5373.570;evm.model.Contig5386.46;evm.model.Contig5386.878;evm.model.Contig5387.109;evm.model.Contig5483.805;evm.model.Contig5483.844;evm.model.Contig6055.2…	0.0028951	0.0405679
				GO:0045184	establishment of protein localization	303	20	9.28	0.00097	BP	evm.model.Contig10143.685;evm.model.Contig10143.967;evm.model.Contig12381.647;evm.model.Contig2581.770;evm.model.Contig2712.1740;evm.model.Contig3098.160;evm.model.Contig3364.299;evm.model.Contig3364.34;evm.model.Contig5252.334;evm.model.Contig5373.570;evm.model.Contig5386.46;evm.model.Contig5386.878;evm.model.Contig5387.109;evm.model.Contig5483.805;evm.model.Contig5483.844;evm.model.Contig6055.2…	0.0033901	0.0405679
				GO:0033036	macromolecule localization	352	22	10.78	0.00112	BP	evm.model.Contig10143.685;evm.model.Contig10143.967;evm.model.Contig12381.647;evm.model.Contig2581.770;evm.model.Contig2712.1740;evm.model.Contig3098.160;evm.model.Contig3364.299;evm.model.Contig3364.34;evm.model.Contig5252.334;evm.model.Contig5252.341;evm.model.Contig5373.570;evm.model.Contig5386.46;evm.model.Contig5386.878;evm.model.Contig5387.109;evm.model.Contig5483.805;evm.model.Contig5483.8…	0.00372615	0.0446247
				GO:0006508	proteolysis	423	25	12.96	0.00116	BP	evm.model.Contig10440.65;evm.model.Contig10660.554;evm.model.Contig11518.53;evm.model.Contig11642.355;evm.model.Contig11642.813;evm.model.Contig14326.498;evm.model.Contig16184.95;evm.model.Contig2685.1091;evm.model.Contig2685.348;evm.model.Contig2685.39;evm.model.Contig2712.1402;evm.model.Contig2712.391;evm.model.Contig2712.859;evm.model.Contig5252.1460;evm.model.Contig5252.642;evm.model.Contig52…	0.00382248	0.0507099
				GO:0060255	regulation of macromolecule metabolic process	70	8	2.14	0.00126	BP	evm.model.Contig12381.402;evm.model.Contig12381.592;evm.model.Contig2712.1482;evm.model.Contig2712.1961;evm.model.Contig2712.321;evm.model.Contig5386.713;evm.model.Contig5387.372;evm.model.Contig9867.840	0.00411283	0.0162272
				GO:0008104	protein localization	311	20	9.53	0.00133	BP	evm.model.Contig10143.685;evm.model.Contig10143.967;evm.model.Contig12381.647;evm.model.Contig2581.770;evm.model.Contig2712.1740;evm.model.Contig3098.160;evm.model.Contig3364.299;evm.model.Contig3364.34;evm.model.Contig5252.334;evm.model.Contig5373.570;evm.model.Contig5386.46;evm.model.Contig5386.878;evm.model.Contig5387.109;evm.model.Contig5483.805;evm.model.Contig5483.844;evm.model.Contig6055.2…	0.00430075	0.0405679
				GO:0006418	tRNA aminoacylation for protein translation	58	7	1.78	0.00184	BP	evm.model.Contig10660.538;evm.model.Contig2581.907;evm.model.Contig2685.204;evm.model.Contig5373.381;evm.model.Contig5386.31;evm.model.Contig75.20;evm.model.Contig8573.20	0.00563398	0.0141988
				GO:0043038	amino acid activation	58	7	1.78	0.00184	BP	evm.model.Contig10660.538;evm.model.Contig2581.907;evm.model.Contig2685.204;evm.model.Contig5373.381;evm.model.Contig5386.31;evm.model.Contig75.20;evm.model.Contig8573.20	0.00563398	0.0141988
				GO:0043039	tRNA aminoacylation	58	7	1.78	0.00184	BP	evm.model.Contig10660.538;evm.model.Contig2581.907;evm.model.Contig2685.204;evm.model.Contig5373.381;evm.model.Contig5386.31;evm.model.Contig75.20;evm.model.Contig8573.20	0.00563398	0.0141988
				GO:1901565	organonitrogen compound catabolic process	171	13	5.24	0.00222	BP	evm.model.Contig10660.554;evm.model.Contig11518.53;evm.model.Contig14326.498;evm.model.Contig16184.95;evm.model.Contig2685.1091;evm.model.Contig2685.39;evm.model.Contig2712.391;evm.model.Contig2712.859;evm.model.Contig5252.1460;evm.model.Contig5252.883;evm.model.Contig5386.713;evm.model.Contig9220.654;evm.model.Contig9867.34	0.00665155	0.0263692
				GO:0009056	catabolic process	303	19	9.28	0.00234	BP	evm.model.Contig10660.554;evm.model.Contig11518.53;evm.model.Contig14326.498;evm.model.Contig14326.753;evm.model.Contig16184.95;evm.model.Contig2685.1091;evm.model.Contig2685.39;evm.model.Contig2712.391;evm.model.Contig2712.859;evm.model.Contig2800.116;evm.model.Contig5252.1460;evm.model.Contig5252.883;evm.model.Contig5386.713;evm.model.Contig5387.372;evm.model.Contig8624.802;evm.model.Contig9220…	0.00692	0.0385395
				GO:0019222	regulation of metabolic process	79	8	2.42	0.00276	BP	evm.model.Contig12381.402;evm.model.Contig12381.592;evm.model.Contig2712.1482;evm.model.Contig2712.1961;evm.model.Contig2712.321;evm.model.Contig5386.713;evm.model.Contig5387.372;evm.model.Contig9867.840	0.00809288	0.0162272
				GO:0034654	nucleobase-containing compound biosynthetic process	197	14	6.03	0.00285	BP	evm.model.Contig10143.214;evm.model.Contig10143.429;evm.model.Contig12381.402;evm.model.Contig14326.397;evm.model.Contig14326.753;evm.model.Contig2712.1961;evm.model.Contig2712.321;evm.model.Contig2800.348;evm.model.Contig5386.121;evm.model.Contig5483.547;evm.model.Contig6055.301;evm.model.Contig8624.295;evm.model.Contig8624.802;evm.model.Contig9220.430	0.00828655	0.0283976
				GO:0009059	macromolecule biosynthetic process	718	35	22	0.00372	BP	evm.model.Contig10660.179;evm.model.Contig10660.538;evm.model.Contig11642.1104;evm.model.Contig11642.1601;evm.model.Contig11642.575;evm.model.Contig12381.402;evm.model.Contig14326.187;evm.model.Contig16184.51;evm.model.Contig2581.907;evm.model.Contig2685.1102;evm.model.Contig2685.1124;evm.model.Contig2685.204;evm.model.Contig2685.89;evm.model.Contig2712.1525;evm.model.Contig2712.1961;evm.model.Co…	0.01038	0.0709939
				GO:0071705	nitrogen compound transport	341	20	10.45	0.00392	BP	evm.model.Contig10143.685;evm.model.Contig10143.967;evm.model.Contig12381.647;evm.model.Contig2581.770;evm.model.Contig2712.1740;evm.model.Contig3098.160;evm.model.Contig3364.299;evm.model.Contig3364.34;evm.model.Contig5252.334;evm.model.Contig5373.570;evm.model.Contig5386.46;evm.model.Contig5386.878;evm.model.Contig5387.109;evm.model.Contig5483.805;evm.model.Contig5483.844;evm.model.Contig6055.2…	0.0108506	0.0405679
				GO:0008033	tRNA processing	36	5	1.1	0.00449	BP	evm.model.Contig10143.429;evm.model.Contig10660.364;evm.model.Contig2712.300;evm.model.Contig3098.216;evm.model.Contig9220.429	0.0123297	0.010142
				GO:0071702	organic substance transport	394	22	12.07	0.00456	BP	evm.model.Contig10143.685;evm.model.Contig10143.967;evm.model.Contig12381.647;evm.model.Contig2581.770;evm.model.Contig2712.1740;evm.model.Contig3098.160;evm.model.Contig3364.299;evm.model.Contig3364.34;evm.model.Contig5252.334;evm.model.Contig5252.341;evm.model.Contig5373.570;evm.model.Contig5386.46;evm.model.Contig5386.878;evm.model.Contig5387.109;evm.model.Contig5483.805;evm.model.Contig5483.8…	0.0124184	0.0446247
				GO:0034645	cellular macromolecule biosynthetic process	716	34	21.93	0.00636	BP	evm.model.Contig10660.179;evm.model.Contig10660.538;evm.model.Contig11642.1104;evm.model.Contig11642.1601;evm.model.Contig11642.575;evm.model.Contig12381.402;evm.model.Contig14326.187;evm.model.Contig16184.51;evm.model.Contig2581.907;evm.model.Contig2685.1102;evm.model.Contig2685.1124;evm.model.Contig2685.204;evm.model.Contig2685.89;evm.model.Contig2712.1525;evm.model.Contig2712.1961;evm.model.Co…	0.0169274	0.0689655
				GO:0046488	phosphatidylinositol metabolic process	56	6	1.72	0.00701	BP	evm.model.Contig10143.579;evm.model.Contig10143.967;evm.model.Contig10660.179;evm.model.Contig11642.1104;evm.model.Contig2712.274;evm.model.Contig9220.1044	0.0183146	0.0121704
				GO:0090304	nucleic acid metabolic process	476	57	14.58	6.3e-20	BP	evm.model.Contig10143.214;evm.model.Contig10143.429;evm.model.Contig10660.364;evm.model.Contig10660.518;evm.model.Contig10660.538;evm.model.Contig11518.43;evm.model.Contig11642.1622;evm.model.Contig11642.575;evm.model.Contig12381.218;evm.model.Contig12381.402;evm.model.Contig14326.260;evm.model.Contig14326.604;evm.model.Contig16184.51;evm.model.Contig2581.704;evm.model.Contig2581.907;evm.model.Co…	2.1798e-17	0.115619
				GO:0006139	nucleobase-containing compound metabolic process	725	67	22.21	2.4e-17	BP	evm.model.Contig10143.214;evm.model.Contig10143.429;evm.model.Contig10660.364;evm.model.Contig10660.518;evm.model.Contig10660.538;evm.model.Contig11518.43;evm.model.Contig11642.1622;evm.model.Contig11642.56;evm.model.Contig11642.575;evm.model.Contig12381.218;evm.model.Contig12381.402;evm.model.Contig14326.260;evm.model.Contig14326.397;evm.model.Contig14326.604;evm.model.Contig14326.753;evm.model.…	2.768e-15	0.135903
				GO:0046483	heterocycle metabolic process	861	69	26.38	1.2e-14	BP	evm.model.Contig10143.214;evm.model.Contig10143.429;evm.model.Contig10660.364;evm.model.Contig10660.518;evm.model.Contig10660.538;evm.model.Contig11518.43;evm.model.Contig11642.1622;evm.model.Contig11642.56;evm.model.Contig11642.575;evm.model.Contig11642.957;evm.model.Contig12381.218;evm.model.Contig12381.402;evm.model.Contig14326.260;evm.model.Contig14326.397;evm.model.Contig14326.604;evm.model.…	1.038e-12	0.139959
				GO:1901360	organic cyclic compound metabolic process	892	70	27.33	2.2e-14	BP	evm.model.Contig10143.214;evm.model.Contig10143.429;evm.model.Contig10660.364;evm.model.Contig10660.518;evm.model.Contig10660.538;evm.model.Contig11518.43;evm.model.Contig11642.1622;evm.model.Contig11642.56;evm.model.Contig11642.575;evm.model.Contig11642.957;evm.model.Contig12381.218;evm.model.Contig12381.402;evm.model.Contig14326.260;evm.model.Contig14326.397;evm.model.Contig14326.604;evm.model.…	1.5224e-12	0.141988
				GO:0006725	cellular aromatic compound metabolic process	858	68	26.28	3.6e-14	BP	evm.model.Contig10143.214;evm.model.Contig10143.429;evm.model.Contig10660.364;evm.model.Contig10660.518;evm.model.Contig10660.538;evm.model.Contig11518.43;evm.model.Contig11642.1622;evm.model.Contig11642.56;evm.model.Contig11642.575;evm.model.Contig11642.957;evm.model.Contig12381.218;evm.model.Contig12381.402;evm.model.Contig14326.260;evm.model.Contig14326.397;evm.model.Contig14326.604;evm.model.…	2.076e-12	0.137931
				GO:0016070	RNA metabolic process	284	34	8.7	4.9e-12	BP	evm.model.Contig10143.214;evm.model.Contig10143.429;evm.model.Contig10660.364;evm.model.Contig10660.538;evm.model.Contig12381.402;evm.model.Contig14326.604;evm.model.Contig2581.704;evm.model.Contig2581.907;evm.model.Contig2685.204;evm.model.Contig2685.657;evm.model.Contig2712.1961;evm.model.Contig2712.300;evm.model.Contig2712.321;evm.model.Contig2712.605;evm.model.Contig2800.135;evm.model.Contig3…	1.54127e-10	0.0689655
				GO:0043170	macromolecule metabolic process	2612	131	80.02	5.7e-12	BP	evm.model.Contig10143.202;evm.model.Contig10143.214;evm.model.Contig10143.343;evm.model.Contig10143.429;evm.model.Contig10440.65;evm.model.Contig10660.179;evm.model.Contig10660.364;evm.model.Contig10660.518;evm.model.Contig10660.538;evm.model.Contig10660.554;evm.model.Contig11518.43;evm.model.Contig11518.53;evm.model.Contig11642.1104;evm.model.Contig11642.1601;evm.model.Contig11642.1622;evm.model…	1.6435e-10	0.26572
				GO:0006807	nitrogen compound metabolic process	3072	141	94.11	4.5e-10	BP	evm.model.Contig10143.202;evm.model.Contig10143.214;evm.model.Contig10143.343;evm.model.Contig10143.429;evm.model.Contig10440.65;evm.model.Contig10660.179;evm.model.Contig10660.364;evm.model.Contig10660.518;evm.model.Contig10660.538;evm.model.Contig10660.554;evm.model.Contig11518.43;evm.model.Contig11518.53;evm.model.Contig11642.1104;evm.model.Contig11642.1601;evm.model.Contig11642.1622;evm.model…	1.19769e-08	0.286004
S3axis	orange
				GO:0006334	nucleosome assembly	64	5	0.55	0.0002	BP	evm.model.Contig12381.32;evm.model.Contig14326.662;evm.model.Contig2685.743;evm.model.Contig5373.289;evm.model.Contig5483.523	0.00243	0.0431035
				GO:0031497	chromatin assembly	64	5	0.55	0.0002	BP	evm.model.Contig12381.32;evm.model.Contig14326.662;evm.model.Contig2685.743;evm.model.Contig5373.289;evm.model.Contig5483.523	0.00243	0.0431035
				GO:0034728	nucleosome organization	64	5	0.55	0.0002	BP	evm.model.Contig12381.32;evm.model.Contig14326.662;evm.model.Contig2685.743;evm.model.Contig5373.289;evm.model.Contig5483.523	0.00243	0.0431035
				GO:0006333	chromatin assembly or disassembly	65	5	0.55	0.00021	BP	evm.model.Contig12381.32;evm.model.Contig14326.662;evm.model.Contig2685.743;evm.model.Contig5373.289;evm.model.Contig5483.523	0.00243	0.0431035
				GO:0065004	protein-DNA complex assembly	66	5	0.56	0.00023	BP	evm.model.Contig12381.32;evm.model.Contig14326.662;evm.model.Contig2685.743;evm.model.Contig5373.289;evm.model.Contig5483.523	0.00243	0.0431035
				GO:0071824	protein-DNA complex subunit organization	66	5	0.56	0.00023	BP	evm.model.Contig12381.32;evm.model.Contig14326.662;evm.model.Contig2685.743;evm.model.Contig5373.289;evm.model.Contig5483.523	0.00243	0.0431035
				GO:0006323	DNA packaging	68	5	0.58	0.00027	BP	evm.model.Contig12381.32;evm.model.Contig14326.662;evm.model.Contig2685.743;evm.model.Contig5373.289;evm.model.Contig5483.523	0.00243	0.0431035
				GO:0071103	DNA conformation change	79	5	0.67	0.00053	BP	evm.model.Contig12381.32;evm.model.Contig14326.662;evm.model.Contig2685.743;evm.model.Contig5373.289;evm.model.Contig5483.523	0.00408857	0.0431035
				GO:0051276	chromosome organization	122	6	1.04	0.00057	BP	evm.model.Contig12381.32;evm.model.Contig12381.493;evm.model.Contig14326.662;evm.model.Contig2685.743;evm.model.Contig5373.289;evm.model.Contig5483.523	0.004104	0.0517241
				GO:0006996	organelle organization	236	8	2.01	0.00082	BP	evm.model.Contig12381.32;evm.model.Contig12381.493;evm.model.Contig14326.662;evm.model.Contig2685.743;evm.model.Contig5373.289;evm.model.Contig5373.405;evm.model.Contig5483.523;evm.model.Contig5483.911	0.005535	0.0689655
				GO:0006325	chromatin organization	91	5	0.78	0.00102	BP	evm.model.Contig12381.32;evm.model.Contig14326.662;evm.model.Contig2685.743;evm.model.Contig5373.289;evm.model.Contig5483.523	0.00648	0.0431035
				GO:0034622	cellular protein-containing complex assembly	125	5	1.06	0.00411	BP	evm.model.Contig12381.32;evm.model.Contig14326.662;evm.model.Contig2685.743;evm.model.Contig5373.289;evm.model.Contig5483.523	0.02466	0.0431035
				GO:0065003	protein-containing complex assembly	137	5	1.17	0.00606	BP	evm.model.Contig12381.32;evm.model.Contig14326.662;evm.model.Contig2685.743;evm.model.Contig5373.289;evm.model.Contig5483.523	0.0344463	0.0431035
				GO:0016043	cellular component organization	401	9	3.42	0.00657	BP	evm.model.Contig12381.32;evm.model.Contig12381.493;evm.model.Contig14326.214;evm.model.Contig14326.662;evm.model.Contig2685.743;evm.model.Contig5373.289;evm.model.Contig5373.405;evm.model.Contig5483.523;evm.model.Contig5483.911	0.035478	0.0775862
				GO:0044427	chromosomal part	83	6	0.78	9.8e-05	CC	evm.model.Contig12381.32;evm.model.Contig12381.493;evm.model.Contig14326.662;evm.model.Contig2685.743;evm.model.Contig5373.289;evm.model.Contig5483.523	0.00243	0.0517241
				GO:0000786	nucleosome	59	5	0.55	0.00019	CC	evm.model.Contig12381.32;evm.model.Contig14326.662;evm.model.Contig2685.743;evm.model.Contig5373.289;evm.model.Contig5483.523	0.00243	0.0431035
				GO:0032993	protein-DNA complex	59	5	0.55	0.00019	CC	evm.model.Contig12381.32;evm.model.Contig14326.662;evm.model.Contig2685.743;evm.model.Contig5373.289;evm.model.Contig5483.523	0.00243	0.0431035
				GO:0044815	DNA packaging complex	61	5	0.57	0.00022	CC	evm.model.Contig12381.32;evm.model.Contig14326.662;evm.model.Contig2685.743;evm.model.Contig5373.289;evm.model.Contig5483.523	0.00243	0.0431035
				GO:0005694	chromosome	100	6	0.94	0.00027	CC	evm.model.Contig12381.32;evm.model.Contig12381.493;evm.model.Contig14326.662;evm.model.Contig2685.743;evm.model.Contig5373.289;evm.model.Contig5483.523	0.00243	0.0517241
				GO:0000785	chromatin	66	5	0.62	0.00032	CC	evm.model.Contig12381.32;evm.model.Contig14326.662;evm.model.Contig2685.743;evm.model.Contig5373.289;evm.model.Contig5483.523	0.00265846	0.0431035
				GO:0034613	cellular protein localization	242	14	4.83	0.00032	BP	evm.model.Contig11642.1492;evm.model.Contig11642.646;evm.model.Contig12381.104;evm.model.Contig14326.274;evm.model.Contig14326.845;evm.model.Contig14326.920;evm.model.Contig2685.818;evm.model.Contig2685.873;evm.model.Contig2712.1548;evm.model.Contig2712.283;evm.model.Contig2800.151;evm.model.Contig2800.204;evm.model.Contig29751.222;evm.model.Contig33180.290	0.0246164	0.054902
				GO:0070727	cellular macromolecule localization	242	14	4.83	0.00032	BP	evm.model.Contig11642.1492;evm.model.Contig11642.646;evm.model.Contig12381.104;evm.model.Contig14326.274;evm.model.Contig14326.845;evm.model.Contig14326.920;evm.model.Contig2685.818;evm.model.Contig2685.873;evm.model.Contig2712.1548;evm.model.Contig2712.283;evm.model.Contig2800.151;evm.model.Contig2800.204;evm.model.Contig29751.222;evm.model.Contig33180.290	0.0246164	0.054902
				GO:0015031	protein transport	297	15	5.93	0.00083	BP	evm.model.Contig11642.1492;evm.model.Contig11642.646;evm.model.Contig12381.104;evm.model.Contig14326.274;evm.model.Contig14326.845;evm.model.Contig14326.920;evm.model.Contig2685.818;evm.model.Contig2685.873;evm.model.Contig2712.1548;evm.model.Contig2712.283;evm.model.Contig2800.151;evm.model.Contig2800.204;evm.model.Contig29751.222;evm.model.Contig33180.290;evm.model.Contig5483.537	0.0246164	0.0588235
S3sc, S4sc	cyan			GO:0015833	peptide transport	299	15	5.97	0.00089	BP	evm.model.Contig11642.1492;evm.model.Contig11642.646;evm.model.Contig12381.104;evm.model.Contig14326.274;evm.model.Contig14326.845;evm.model.Contig14326.920;evm.model.Contig2685.818;evm.model.Contig2685.873;evm.model.Contig2712.1548;evm.model.Contig2712.283;evm.model.Contig2800.151;evm.model.Contig2800.204;evm.model.Contig29751.222;evm.model.Contig33180.290;evm.model.Contig5483.537	0.0246164	0.0588235
				GO:0042886	amide transport	299	15	5.97	0.00089	BP	evm.model.Contig11642.1492;evm.model.Contig11642.646;evm.model.Contig12381.104;evm.model.Contig14326.274;evm.model.Contig14326.845;evm.model.Contig14326.920;evm.model.Contig2685.818;evm.model.Contig2685.873;evm.model.Contig2712.1548;evm.model.Contig2712.283;evm.model.Contig2800.151;evm.model.Contig2800.204;evm.model.Contig29751.222;evm.model.Contig33180.290;evm.model.Contig5483.537	0.0246164	0.0588235
				GO:1902600	proton transmembrane transport	57	6	1.14	0.0009	BP	evm.model.Contig10143.1244;evm.model.Contig11642.138;evm.model.Contig14326.809;evm.model.Contig2685.785;evm.model.Contig3364.191;evm.model.Contig5482.236	0.0246164	0.0235294
				GO:0045184	establishment of protein localization	303	15	6.05	0.00102	BP	evm.model.Contig11642.1492;evm.model.Contig11642.646;evm.model.Contig12381.104;evm.model.Contig14326.274;evm.model.Contig14326.845;evm.model.Contig14326.920;evm.model.Contig2685.818;evm.model.Contig2685.873;evm.model.Contig2712.1548;evm.model.Contig2712.283;evm.model.Contig2800.151;evm.model.Contig2800.204;evm.model.Contig29751.222;evm.model.Contig33180.290;evm.model.Contig5483.537	0.0246164	0.0588235
				GO:0051641	cellular localization	276	14	5.51	0.00119	BP	evm.model.Contig11642.1492;evm.model.Contig11642.646;evm.model.Contig12381.104;evm.model.Contig14326.274;evm.model.Contig14326.845;evm.model.Contig14326.920;evm.model.Contig2685.818;evm.model.Contig2685.873;evm.model.Contig2712.1548;evm.model.Contig2712.283;evm.model.Contig2800.151;evm.model.Contig2800.204;evm.model.Contig29751.222;evm.model.Contig33180.290	0.0246164	0.054902
				GO:0008104	protein localization	311	15	6.21	0.00133	BP	evm.model.Contig11642.1492;evm.model.Contig11642.646;evm.model.Contig12381.104;evm.model.Contig14326.274;evm.model.Contig14326.845;evm.model.Contig14326.920;evm.model.Contig2685.818;evm.model.Contig2685.873;evm.model.Contig2712.1548;evm.model.Contig2712.283;evm.model.Contig2800.151;evm.model.Contig2800.204;evm.model.Contig29751.222;evm.model.Contig33180.290;evm.model.Contig5483.537	0.0246164	0.0588235
				GO:0006886	intracellular protein transport	219	12	4.37	0.0014	BP	evm.model.Contig11642.1492;evm.model.Contig11642.646;evm.model.Contig12381.104;evm.model.Contig14326.274;evm.model.Contig14326.845;evm.model.Contig14326.920;evm.model.Contig2685.818;evm.model.Contig2685.873;evm.model.Contig2712.1548;evm.model.Contig2712.283;evm.model.Contig2800.151;evm.model.Contig29751.222	0.0246164	0.0470588
				GO:0006913	nucleocytoplasmic transport	69	6	1.38	0.00244	BP	evm.model.Contig11642.646;evm.model.Contig2685.873;evm.model.Contig2712.1548;evm.model.Contig2712.283;evm.model.Contig2800.151;evm.model.Contig29751.222	0.0329732	0.0235294
				GO:0051169	nuclear transport	69	6	1.38	0.00244	BP	evm.model.Contig11642.646;evm.model.Contig2685.873;evm.model.Contig2712.1548;evm.model.Contig2712.283;evm.model.Contig2800.151;evm.model.Contig29751.222	0.0329732	0.0235294
				GO:0098660	inorganic ion transmembrane transport	95	7	1.9	0.0028	BP	evm.model.Contig10143.1244;evm.model.Contig11642.138;evm.model.Contig14326.809;evm.model.Contig2685.785;evm.model.Contig3364.191;evm.model.Contig3364.59;evm.model.Contig5482.236	0.0329732	0.027451
				GO:0098662	inorganic cation transmembrane transport	95	7	1.9	0.0028	BP	evm.model.Contig10143.1244;evm.model.Contig11642.138;evm.model.Contig14326.809;evm.model.Contig2685.785;evm.model.Contig3364.191;evm.model.Contig3364.59;evm.model.Contig5482.236	0.0329732	0.027451
				GO:0046907	intracellular transport	240	12	4.79	0.00301	BP	evm.model.Contig11642.1492;evm.model.Contig11642.646;evm.model.Contig12381.104;evm.model.Contig14326.274;evm.model.Contig14326.845;evm.model.Contig14326.920;evm.model.Contig2685.818;evm.model.Contig2685.873;evm.model.Contig2712.1548;evm.model.Contig2712.283;evm.model.Contig2800.151;evm.model.Contig29751.222	0.0329732	0.0470588
				GO:0051649	establishment of localization in cell	240	12	4.79	0.00301	BP	evm.model.Contig11642.1492;evm.model.Contig11642.646;evm.model.Contig12381.104;evm.model.Contig14326.274;evm.model.Contig14326.845;evm.model.Contig14326.920;evm.model.Contig2685.818;evm.model.Contig2685.873;evm.model.Contig2712.1548;evm.model.Contig2712.283;evm.model.Contig2800.151;evm.model.Contig29751.222	0.0329732	0.0470588
				GO:0071705	nitrogen compound transport	341	15	6.81	0.00326	BP	evm.model.Contig11642.1492;evm.model.Contig11642.646;evm.model.Contig12381.104;evm.model.Contig14326.274;evm.model.Contig14326.845;evm.model.Contig14326.920;evm.model.Contig2685.818;evm.model.Contig2685.873;evm.model.Contig2712.1548;evm.model.Contig2712.283;evm.model.Contig2800.151;evm.model.Contig2800.204;evm.model.Contig29751.222;evm.model.Contig33180.290;evm.model.Contig5483.537	0.0341591	0.0588235
				GO:0033365	protein localization to organelle	52	5	1.04	0.00363	BP	evm.model.Contig11642.1492;evm.model.Contig14326.274;evm.model.Contig2712.1548;evm.model.Contig2800.204;evm.model.Contig33180.290	0.0364512	0.0196078
				GO:0033036	macromolecule localization	352	15	7.02	0.00438	BP	evm.model.Contig11642.1492;evm.model.Contig11642.646;evm.model.Contig12381.104;evm.model.Contig14326.274;evm.model.Contig14326.845;evm.model.Contig14326.920;evm.model.Contig2685.818;evm.model.Contig2685.873;evm.model.Contig2712.1548;evm.model.Contig2712.283;evm.model.Contig2800.151;evm.model.Contig2800.204;evm.model.Contig29751.222;evm.model.Contig33180.290;evm.model.Contig5483.537	0.0422232	0.0588235
				GO:0005740	mitochondrial envelope	67	5	0.99	0.0029	CC	evm.model.Contig10143.1092;evm.model.Contig11642.438;evm.model.Contig14326.274;evm.model.Contig2685.818;evm.model.Contig3098.130	0.0329732	0.0196078
				GO:0044429	mitochondrial part	75	5	1.11	0.0047	CC	evm.model.Contig10143.1092;evm.model.Contig11642.438;evm.model.Contig14326.274;evm.model.Contig2685.818;evm.model.Contig3098.130	0.0435654	0.0196078
				GO:0050662	coenzyme binding	361	18	6.43	8e-05	MF	evm.model.Contig10143.233;evm.model.Contig11518.70;evm.model.Contig11642.26;evm.model.Contig14326.201;evm.model.Contig14326.565;evm.model.Contig249200.1;evm.model.Contig2581.222;evm.model.Contig2685.1047;evm.model.Contig2685.825;evm.model.Contig2800.215;evm.model.Contig5373.573;evm.model.Contig5386.1263;evm.model.Contig5387.184;evm.model.Contig5483.249;evm.model.Contig8624.151;evm.model.Contig986…	0.01928	0.0705882
				GO:0019842	vitamin binding	101	8	1.8	0.00043	MF	evm.model.Contig10143.233;evm.model.Contig11518.70;evm.model.Contig14326.201;evm.model.Contig249200.1;evm.model.Contig2581.222;evm.model.Contig8624.151;evm.model.Contig9867.211;evm.model.Contig9868.56	0.0246164	0.0313725
				GO:0031406	carboxylic acid binding	47	5	0.84	0.00143	MF	evm.model.Contig11518.70;evm.model.Contig6055.443;evm.model.Contig8624.151;evm.model.Contig9867.211;evm.model.Contig9868.56	0.0246164	0.0196078
				GO:0043177	organic acid binding	47	5	0.84	0.00143	MF	evm.model.Contig11518.70;evm.model.Contig6055.443;evm.model.Contig8624.151;evm.model.Contig9867.211;evm.model.Contig9868.56	0.0246164	0.0196078
				GO:0048037	cofactor binding	678	23	12.08	0.00221	MF	evm.model.Contig10143.233;evm.model.Contig11518.70;evm.model.Contig11642.1685;evm.model.Contig11642.26;evm.model.Contig14326.201;evm.model.Contig14326.565;evm.model.Contig249200.1;evm.model.Contig2581.222;evm.model.Contig2685.1047;evm.model.Contig2685.825;evm.model.Contig2712.1293;evm.model.Contig2712.1797;evm.model.Contig2800.215;evm.model.Contig5373.573;evm.model.Contig5386.1263;evm.model.Conti…	0.0329732	0.0901961
				GO:0034645	cellular macromolecule biosynthetic process	716	8	2.18	0.00089	BP	evm.model.Contig14326.615;evm.model.Contig14326.914;evm.model.Contig2685.790;evm.model.Contig2712.714;evm.model.Contig5483.457;evm.model.Contig8573.340;evm.model.Contig9220.40;evm.model.Contig9867.373	0.02025	0.2
S3sc, S4sc	paleturquoise			GO:0009059	macromolecule biosynthetic process	718	8	2.19	0.00091	BP	evm.model.Contig14326.615;evm.model.Contig14326.914;evm.model.Contig2685.790;evm.model.Contig2712.714;evm.model.Contig5483.457;evm.model.Contig8573.340;evm.model.Contig9220.40;evm.model.Contig9867.373	0.02025	0.2
				GO:0009058	biosynthetic process	1401	11	4.27	0.00141	BP	evm.model.Contig11518.92;evm.model.Contig14326.615;evm.model.Contig14326.914;evm.model.Contig2685.790;evm.model.Contig2712.714;evm.model.Contig5373.559;evm.model.Contig5483.457;evm.model.Contig8573.340;evm.model.Contig9220.40;evm.model.Contig9220.490;evm.model.Contig9867.373	0.02025	0.275
				GO:0019752	carboxylic acid metabolic process	456	6	1.39	0.00202	BP	evm.model.Contig2685.790;evm.model.Contig5373.559;evm.model.Contig5483.457;evm.model.Contig9220.490;evm.model.Contig9867.373;evm.model.Contig9867.841	0.02025	0.15
				GO:0043436	oxoacid metabolic process	456	6	1.39	0.00202	BP	evm.model.Contig2685.790;evm.model.Contig5373.559;evm.model.Contig5483.457;evm.model.Contig9220.490;evm.model.Contig9867.373;evm.model.Contig9867.841	0.02025	0.15
				GO:0006082	organic acid metabolic process	458	6	1.4	0.00206	BP	evm.model.Contig2685.790;evm.model.Contig5373.559;evm.model.Contig5483.457;evm.model.Contig9220.490;evm.model.Contig9867.373;evm.model.Contig9867.841	0.02025	0.15
				GO:0044249	cellular biosynthetic process	1248	10	3.81	0.00225	BP	evm.model.Contig14326.615;evm.model.Contig14326.914;evm.model.Contig2685.790;evm.model.Contig2712.714;evm.model.Contig5373.559;evm.model.Contig5483.457;evm.model.Contig8573.340;evm.model.Contig9220.40;evm.model.Contig9220.490;evm.model.Contig9867.373	0.02025	0.25
				GO:1901576	organic substance biosynthetic process	1272	10	3.88	0.00261	BP	evm.model.Contig14326.615;evm.model.Contig14326.914;evm.model.Contig2685.790;evm.model.Contig2712.714;evm.model.Contig5373.559;evm.model.Contig5483.457;evm.model.Contig8573.340;evm.model.Contig9220.40;evm.model.Contig9220.490;evm.model.Contig9867.373	0.0205537	0.25
				GO:1901566	organonitrogen compound biosynthetic process	916	8	2.79	0.00436	BP	evm.model.Contig14326.615;evm.model.Contig2685.790;evm.model.Contig2712.714;evm.model.Contig5373.559;evm.model.Contig5483.457;evm.model.Contig8573.340;evm.model.Contig9220.490;evm.model.Contig9867.373	0.03052	0.2
S3sc, S4sc	yellow			GO:0034637	cellular carbohydrate biosynthetic process	83	23	5.83	6.5e-09	BP	evm.model.Contig10143.620;evm.model.Contig10660.363;evm.model.Contig11642.1071;evm.model.Contig12381.530;evm.model.Contig12381.531;evm.model.Contig12381.532;evm.model.Contig14326.778;evm.model.Contig155702.1;evm.model.Contig2581.182;evm.model.Contig2685.1031;evm.model.Contig2685.80;evm.model.Contig33180.213;evm.model.Contig5386.806;evm.model.Contig5387.242;evm.model.Contig5482.104;evm.model.Conti…	3.029e-06	0.0227498
				GO:0016051	carbohydrate biosynthetic process	98	23	6.89	1.9e-07	BP	evm.model.Contig10143.620;evm.model.Contig10660.363;evm.model.Contig11642.1071;evm.model.Contig12381.530;evm.model.Contig12381.531;evm.model.Contig12381.532;evm.model.Contig14326.778;evm.model.Contig155702.1;evm.model.Contig2581.182;evm.model.Contig2685.1031;evm.model.Contig2685.80;evm.model.Contig33180.213;evm.model.Contig5386.806;evm.model.Contig5387.242;evm.model.Contig5482.104;evm.model.Conti…	2.95133e-05	0.0227498
				GO:0000271	polysaccharide biosynthetic process	59	17	4.15	3.4e-07	BP	evm.model.Contig10660.363;evm.model.Contig11642.1071;evm.model.Contig12381.530;evm.model.Contig12381.531;evm.model.Contig12381.532;evm.model.Contig14326.778;evm.model.Contig155702.1;evm.model.Contig2685.80;evm.model.Contig33180.213;evm.model.Contig5386.806;evm.model.Contig5387.242;evm.model.Contig5482.104;evm.model.Contig5482.213;evm.model.Contig5482.78;evm.model.Contig7167.285;evm.model.Contig86…	3.1688e-05	0.016815
				GO:0033692	cellular polysaccharide biosynthetic process	59	17	4.15	3.4e-07	BP	evm.model.Contig10660.363;evm.model.Contig11642.1071;evm.model.Contig12381.530;evm.model.Contig12381.531;evm.model.Contig12381.532;evm.model.Contig14326.778;evm.model.Contig155702.1;evm.model.Contig2685.80;evm.model.Contig33180.213;evm.model.Contig5386.806;evm.model.Contig5387.242;evm.model.Contig5482.104;evm.model.Contig5482.213;evm.model.Contig5482.78;evm.model.Contig7167.285;evm.model.Contig86…	3.1688e-05	0.016815
				GO:0005976	polysaccharide metabolic process	96	22	6.75	5.5e-07	BP	evm.model.Contig10660.363;evm.model.Contig11642.1071;evm.model.Contig12381.530;evm.model.Contig12381.531;evm.model.Contig12381.532;evm.model.Contig14326.778;evm.model.Contig155702.1;evm.model.Contig2685.80;evm.model.Contig2800.15;evm.model.Contig2800.476;evm.model.Contig33180.213;evm.model.Contig5386.806;evm.model.Contig5386.817;evm.model.Contig5387.242;evm.model.Contig5482.104;evm.model.Contig54…	4.27167e-05	0.0217606
				GO:0044262	cellular carbohydrate metabolic process	153	29	10.75	6.8e-07	BP	evm.model.Contig10143.620;evm.model.Contig10660.363;evm.model.Contig11642.1071;evm.model.Contig12381.530;evm.model.Contig12381.531;evm.model.Contig12381.532;evm.model.Contig14326.778;evm.model.Contig155702.1;evm.model.Contig2581.182;evm.model.Contig2685.1031;evm.model.Contig2685.80;evm.model.Contig2712.718;evm.model.Contig2800.15;evm.model.Contig33180.213;evm.model.Contig5386.806;evm.model.Contig…	4.52686e-05	0.0286845
				GO:0044264	cellular polysaccharide metabolic process	87	20	6.12	1.7e-06	BP	evm.model.Contig10660.363;evm.model.Contig11642.1071;evm.model.Contig12381.530;evm.model.Contig12381.531;evm.model.Contig12381.532;evm.model.Contig14326.778;evm.model.Contig155702.1;evm.model.Contig2685.80;evm.model.Contig2800.15;evm.model.Contig33180.213;evm.model.Contig5386.806;evm.model.Contig5386.817;evm.model.Contig5387.242;evm.model.Contig5482.104;evm.model.Contig5482.213;evm.model.Contig54…	9.9025e-05	0.0197824
				GO:0005975	carbohydrate metabolic process	586	70	41.19	5.1e-06	BP	evm.model.Contig10143.1077;evm.model.Contig10143.1353;evm.model.Contig10143.342;evm.model.Contig10143.620;evm.model.Contig10143.863;evm.model.Contig10660.363;evm.model.Contig10660.435;evm.model.Contig10660.482;evm.model.Contig11642.1071;evm.model.Contig11642.1372;evm.model.Contig11642.1379;evm.model.Contig11642.475;evm.model.Contig12381.530;evm.model.Contig12381.531;evm.model.Contig12381.532;evm.…	0.000264067	0.0692384
				GO:0045226	extracellular polysaccharide biosynthetic process	8	5	0.56	7.9e-05	BP	evm.model.Contig12381.530;evm.model.Contig12381.531;evm.model.Contig12381.532;evm.model.Contig33180.213;evm.model.Contig5482.104	0.00262957	0.0049456
				GO:0046379	extracellular polysaccharide metabolic process	8	5	0.56	7.9e-05	BP	evm.model.Contig12381.530;evm.model.Contig12381.531;evm.model.Contig12381.532;evm.model.Contig33180.213;evm.model.Contig5482.104	0.00262957	0.0049456
				GO:0009250	glucan biosynthetic process	48	11	3.37	0.00039	BP	evm.model.Contig10660.363;evm.model.Contig11642.1071;evm.model.Contig14326.778;evm.model.Contig155702.1;evm.model.Contig2685.80;evm.model.Contig5386.806;evm.model.Contig5387.242;evm.model.Contig5482.213;evm.model.Contig7167.285;evm.model.Contig8624.314;evm.model.Contig9867.640	0.00865429	0.0108803
				GO:0051273	beta-glucan metabolic process	48	11	3.37	0.00039	BP	evm.model.Contig10660.363;evm.model.Contig11642.1071;evm.model.Contig14326.778;evm.model.Contig155702.1;evm.model.Contig2685.80;evm.model.Contig5386.806;evm.model.Contig5387.242;evm.model.Contig5482.213;evm.model.Contig7167.285;evm.model.Contig8624.314;evm.model.Contig9867.640	0.00865429	0.0108803
				GO:0051274	beta-glucan biosynthetic process	48	11	3.37	0.00039	BP	evm.model.Contig10660.363;evm.model.Contig11642.1071;evm.model.Contig14326.778;evm.model.Contig155702.1;evm.model.Contig2685.80;evm.model.Contig5386.806;evm.model.Contig5387.242;evm.model.Contig5482.213;evm.model.Contig7167.285;evm.model.Contig8624.314;evm.model.Contig9867.640	0.00865429	0.0108803
				GO:0006073	cellular glucan metabolic process	76	14	5.34	0.00072	BP	evm.model.Contig10660.363;evm.model.Contig11642.1071;evm.model.Contig14326.778;evm.model.Contig155702.1;evm.model.Contig2685.80;evm.model.Contig2800.15;evm.model.Contig5386.806;evm.model.Contig5386.817;evm.model.Contig5387.242;evm.model.Contig5482.213;evm.model.Contig7167.285;evm.model.Contig8624.314;evm.model.Contig9220.790;evm.model.Contig9867.640	0.0136072	0.0138477
				GO:0044042	glucan metabolic process	76	14	5.34	0.00072	BP	evm.model.Contig10660.363;evm.model.Contig11642.1071;evm.model.Contig14326.778;evm.model.Contig155702.1;evm.model.Contig2685.80;evm.model.Contig2800.15;evm.model.Contig5386.806;evm.model.Contig5386.817;evm.model.Contig5387.242;evm.model.Contig5482.213;evm.model.Contig7167.285;evm.model.Contig8624.314;evm.model.Contig9220.790;evm.model.Contig9867.640	0.0136072	0.0138477
				GO:0030243	cellulose metabolic process	37	9	2.6	0.00082	BP	evm.model.Contig10660.363;evm.model.Contig11642.1071;evm.model.Contig14326.778;evm.model.Contig155702.1;evm.model.Contig5387.242;evm.model.Contig5482.213;evm.model.Contig7167.285;evm.model.Contig8624.314;evm.model.Contig9867.640	0.0141407	0.00890208
				GO:0030244	cellulose biosynthetic process	37	9	2.6	0.00082	BP	evm.model.Contig10660.363;evm.model.Contig11642.1071;evm.model.Contig14326.778;evm.model.Contig155702.1;evm.model.Contig5387.242;evm.model.Contig5482.213;evm.model.Contig7167.285;evm.model.Contig8624.314;evm.model.Contig9867.640	0.0141407	0.00890208
				GO:0009309	amine biosynthetic process	12	5	0.84	0.00088	BP	evm.model.Contig2712.1886;evm.model.Contig5483.181;evm.model.Contig9220.1003;evm.model.Contig9867.602;evm.model.Contig9868.573	0.0141407	0.0049456
				GO:0042401	cellular biogenic amine biosynthetic process	12	5	0.84	0.00088	BP	evm.model.Contig2712.1886;evm.model.Contig5483.181;evm.model.Contig9220.1003;evm.model.Contig9867.602;evm.model.Contig9868.573	0.0141407	0.0049456
				GO:0009311	oligosaccharide metabolic process	38	9	2.67	0.00101	BP	evm.model.Contig10143.620;evm.model.Contig2581.182;evm.model.Contig2685.1031;evm.model.Contig2712.718;evm.model.Contig5482.78;evm.model.Contig5483.207;evm.model.Contig7167.148;evm.model.Contig9867.57;evm.model.Contig9868.692	0.0156887	0.00890208
				GO:0005984	disaccharide metabolic process	31	8	2.18	0.00105	BP	evm.model.Contig10143.620;evm.model.Contig2581.182;evm.model.Contig2685.1031;evm.model.Contig2712.718;evm.model.Contig5483.207;evm.model.Contig7167.148;evm.model.Contig9867.57;evm.model.Contig9868.692	0.0157839	0.00791296
				GO:0005992	trehalose biosynthetic process	21	6	1.48	0.00256	BP	evm.model.Contig10143.620;evm.model.Contig2581.182;evm.model.Contig2685.1031;evm.model.Contig5483.207;evm.model.Contig7167.148;evm.model.Contig9867.57	0.0322422	0.00593472
				GO:0009312	oligosaccharide biosynthetic process	29	7	2.04	0.00326	BP	evm.model.Contig10143.620;evm.model.Contig2581.182;evm.model.Contig2685.1031;evm.model.Contig5482.78;evm.model.Contig5483.207;evm.model.Contig7167.148;evm.model.Contig9867.57	0.0395503	0.00692384
				GO:0005991	trehalose metabolic process	22	6	1.55	0.00331	BP	evm.model.Contig10143.620;evm.model.Contig2581.182;evm.model.Contig2685.1031;evm.model.Contig5483.207;evm.model.Contig7167.148;evm.model.Contig9867.57	0.0395503	0.00593472
				GO:0009308	amine metabolic process	37	8	2.6	0.00354	BP	evm.model.Contig10143.774;evm.model.Contig12381.586;evm.model.Contig2712.1886;evm.model.Contig33180.256;evm.model.Contig5483.181;evm.model.Contig9220.1003;evm.model.Contig9867.602;evm.model.Contig9868.573	0.0405761	0.00791296
				GO:0045229	external encapsulating structure organization	81	13	5.69	0.00398	BP	evm.model.Contig11642.1423;evm.model.Contig11642.238;evm.model.Contig14326.1001;evm.model.Contig14326.780;evm.model.Contig2581.29;evm.model.Contig2581.672;evm.model.Contig2685.662;evm.model.Contig2712.1531;evm.model.Contig3364.129;evm.model.Contig5252.1058;evm.model.Contig5482.414;evm.model.Contig5483.609;evm.model.Contig9867.643	0.0431321	0.0128586
				GO:0071555	cell wall organization	81	13	5.69	0.00398	BP	evm.model.Contig11642.1423;evm.model.Contig11642.238;evm.model.Contig14326.1001;evm.model.Contig14326.780;evm.model.Contig2581.29;evm.model.Contig2581.672;evm.model.Contig2685.662;evm.model.Contig2712.1531;evm.model.Contig3364.129;evm.model.Contig5252.1058;evm.model.Contig5482.414;evm.model.Contig5483.609;evm.model.Contig9867.643	0.0431321	0.0128586
				GO:0046351	disaccharide biosynthetic process	23	6	1.62	0.00422	BP	evm.model.Contig10143.620;evm.model.Contig2581.182;evm.model.Contig2685.1031;evm.model.Contig5483.207;evm.model.Contig7167.148;evm.model.Contig9867.57	0.0446936	0.00593472
				GO:0016020	membrane	1789	170	126.49	2.8e-08	CC	evm.model.Contig10143.111;evm.model.Contig10143.1262;evm.model.Contig10143.1277;evm.model.Contig10143.1311;evm.model.Contig10143.392;evm.model.Contig10143.546;evm.model.Contig10143.567;evm.model.Contig10143.611;evm.model.Contig10143.981;evm.model.Contig10143.998;evm.model.Contig10660.162;evm.model.Contig10660.163;evm.model.Contig10660.169;evm.model.Contig10660.187;evm.model.Contig10660.225;evm.mo…	6.524e-06	0.16815
				GO:0071944	cell periphery	131	20	9.26	0.00073	CC	evm.model.Contig10143.380;evm.model.Contig11642.391;evm.model.Contig12381.161;evm.model.Contig12381.344;evm.model.Contig14326.1001;evm.model.Contig16184.52;evm.model.Contig2581.29;evm.model.Contig2685.80;evm.model.Contig2712.1531;evm.model.Contig2800.15;evm.model.Contig3364.129;evm.model.Contig5252.1058;evm.model.Contig5373.115;evm.model.Contig5386.806;evm.model.Contig5386.817;evm.model.Contig548…	0.0136072	0.0197824
				GO:0044425	membrane part	883	84	62.43	0.00109	CC	evm.model.Contig10143.1262;evm.model.Contig10143.567;evm.model.Contig10143.611;evm.model.Contig10143.998;evm.model.Contig10660.227;evm.model.Contig10660.458;evm.model.Contig11518.119;evm.model.Contig11642.1192;evm.model.Contig11642.1400;evm.model.Contig11642.1616;evm.model.Contig11642.605;evm.model.Contig11642.654;evm.model.Contig12381.161;evm.model.Contig12381.177;evm.model.Contig12381.467;evm.m…	0.0158731	0.0830861
				GO:0061695	transferase complex, transferring phosphorus-containing groups	25	7	1.77	0.0013	CC	evm.model.Contig10143.1077;evm.model.Contig10440.57;evm.model.Contig14326.237;evm.model.Contig2712.463;evm.model.Contig3098.362;evm.model.Contig5483.463;evm.model.Contig8624.103	0.0178177	0.00692384
				GO:0031224	intrinsic component of membrane	738	71	52.18	0.00229	CC	evm.model.Contig10143.1262;evm.model.Contig10143.567;evm.model.Contig10143.611;evm.model.Contig10143.998;evm.model.Contig10660.227;evm.model.Contig10660.458;evm.model.Contig11518.119;evm.model.Contig11642.1192;evm.model.Contig11642.1616;evm.model.Contig11642.605;evm.model.Contig11642.654;evm.model.Contig12381.177;evm.model.Contig12381.467;evm.model.Contig12381.53;evm.model.Contig14326.34;evm.mode…	0.0304897	0.0702275
				GO:0016021	integral component of membrane	721	68	50.98	0.00483	CC	evm.model.Contig10143.1262;evm.model.Contig10143.567;evm.model.Contig10143.611;evm.model.Contig10143.998;evm.model.Contig10660.227;evm.model.Contig10660.458;evm.model.Contig11518.119;evm.model.Contig11642.1192;evm.model.Contig11642.1616;evm.model.Contig11642.605;evm.model.Contig11642.654;evm.model.Contig12381.177;evm.model.Contig12381.467;evm.model.Contig12381.53;evm.model.Contig14326.34;evm.mode…	0.047765	0.0672601
				GO:0005798	Golgi-associated vesicle	31	7	2.19	0.00492	CC	evm.model.Contig11642.1400;evm.model.Contig183084.1;evm.model.Contig2685.203;evm.model.Contig2685.429;evm.model.Contig5373.115;evm.model.Contig5386.963;evm.model.Contig9220.1024	0.047765	0.00692384
				GO:0030660	Golgi-associated vesicle membrane	31	7	2.19	0.00492	CC	evm.model.Contig11642.1400;evm.model.Contig183084.1;evm.model.Contig2685.203;evm.model.Contig2685.429;evm.model.Contig5373.115;evm.model.Contig5386.963;evm.model.Contig9220.1024	0.047765	0.00692384
				GO:0046872	metal ion binding	1950	188	142.42	1.6e-05	MF	evm.model.Contig10143.1098;evm.model.Contig10143.111;evm.model.Contig10143.1157;evm.model.Contig10143.1158;evm.model.Contig10143.693;evm.model.Contig10143.717;evm.model.Contig10143.799;evm.model.Contig10143.885;evm.model.Contig10143.899;evm.model.Contig10143.931;evm.model.Contig10143.998;evm.model.Contig10440.53;evm.model.Contig10660.265;evm.model.Contig10660.372;evm.model.Contig10660.390;evm.mod…	0.0007456	0.185954
				GO:0043169	cation binding	1963	188	143.37	2.4e-05	MF	evm.model.Contig10143.1098;evm.model.Contig10143.111;evm.model.Contig10143.1157;evm.model.Contig10143.1158;evm.model.Contig10143.693;evm.model.Contig10143.717;evm.model.Contig10143.799;evm.model.Contig10143.885;evm.model.Contig10143.899;evm.model.Contig10143.931;evm.model.Contig10143.998;evm.model.Contig10440.53;evm.model.Contig10660.265;evm.model.Contig10660.372;evm.model.Contig10660.390;evm.mod…	0.00101673	0.185954
				GO:0046914	transition metal ion binding	1288	130	94.07	5.7e-05	MF	evm.model.Contig10143.1098;evm.model.Contig10143.693;evm.model.Contig10143.717;evm.model.Contig10143.885;evm.model.Contig10143.931;evm.model.Contig10660.372;evm.model.Contig10660.390;evm.model.Contig10660.426;evm.model.Contig10660.435;evm.model.Contig11518.32;evm.model.Contig11642.1071;evm.model.Contig11642.1400;evm.model.Contig11642.1467;evm.model.Contig11642.1575;evm.model.Contig11642.434;evm.m…	0.0022135	0.128586
				GO:0003700	DNA-binding transcription factor activity	523	62	38.2	9.2e-05	MF	evm.model.Contig10143.1019;evm.model.Contig10143.1370;evm.model.Contig10143.447;evm.model.Contig10143.766;evm.model.Contig10143.773;evm.model.Contig11642.1086;evm.model.Contig11642.1563;evm.model.Contig11642.1615;evm.model.Contig11642.182;evm.model.Contig11642.288;evm.model.Contig11642.344;evm.model.Contig11642.942;evm.model.Contig12381.136;evm.model.Contig12381.170;evm.model.Contig12381.334;evm.…	0.00276687	0.0613254
				GO:0008831	dTDP-4-dehydrorhamnose reductase activity	8	5	0.58	9.5e-05	MF	evm.model.Contig12381.530;evm.model.Contig12381.531;evm.model.Contig12381.532;evm.model.Contig33180.213;evm.model.Contig5482.104	0.00276687	0.0049456
				GO:0043565	sequence-specific DNA binding	364	46	26.58	0.00017	MF	evm.model.Contig10143.1019;evm.model.Contig10143.1370;evm.model.Contig10143.447;evm.model.Contig10143.766;evm.model.Contig10143.773;evm.model.Contig11642.1086;evm.model.Contig11642.1563;evm.model.Contig11642.1615;evm.model.Contig11642.182;evm.model.Contig11642.288;evm.model.Contig11642.344;evm.model.Contig11642.942;evm.model.Contig12381.136;evm.model.Contig12381.170;evm.model.Contig17595.21;evm.m…	0.00466	0.0454995
				GO:0140110	transcription regulator activity	538	62	39.29	0.0002	MF	evm.model.Contig10143.1019;evm.model.Contig10143.1370;evm.model.Contig10143.447;evm.model.Contig10143.766;evm.model.Contig10143.773;evm.model.Contig11642.1086;evm.model.Contig11642.1563;evm.model.Contig11642.1615;evm.model.Contig11642.182;evm.model.Contig11642.288;evm.model.Contig11642.344;evm.model.Contig11642.942;evm.model.Contig12381.136;evm.model.Contig12381.170;evm.model.Contig12381.334;evm.…	0.00517778	0.0613254
				GO:0008270	zinc ion binding	923	94	67.41	0.0005	MF	evm.model.Contig10143.1098;evm.model.Contig10143.693;evm.model.Contig10143.717;evm.model.Contig10143.931;evm.model.Contig10660.372;evm.model.Contig10660.390;evm.model.Contig10660.435;evm.model.Contig11518.32;evm.model.Contig11642.1071;evm.model.Contig11642.1400;evm.model.Contig11642.1467;evm.model.Contig11642.51;evm.model.Contig11642.551;evm.model.Contig11642.719;evm.model.Contig12381.244;evm.mod…	0.0105909	0.0929772
				GO:0015103	inorganic anion transmembrane transporter activity	24	7	1.75	0.00124	MF	evm.model.Contig10143.611;evm.model.Contig10660.661;evm.model.Contig12381.177;evm.model.Contig3098.135;evm.model.Contig5386.987;evm.model.Contig5483.804;evm.model.Contig6055.119	0.0175103	0.00692384
				GO:0035251	UDP-glucosyltransferase activity	49	10	3.58	0.00246	MF	evm.model.Contig11642.1071;evm.model.Contig155702.1;evm.model.Contig2685.80;evm.model.Contig2712.718;evm.model.Contig5386.806;evm.model.Contig5387.242;evm.model.Contig5482.213;evm.model.Contig7167.285;evm.model.Contig8624.314;evm.model.Contig9868.692	0.0318433	0.0098912
				GO:0046527	glucosyltransferase activity	77	13	5.62	0.00357	MF	evm.model.Contig11642.1071;evm.model.Contig155702.1;evm.model.Contig2685.80;evm.model.Contig2712.718;evm.model.Contig2800.15;evm.model.Contig5386.806;evm.model.Contig5386.817;evm.model.Contig5387.242;evm.model.Contig5482.213;evm.model.Contig7167.285;evm.model.Contig8624.314;evm.model.Contig9220.790;evm.model.Contig9868.692	0.0405761	0.0128586
				GO:0030145	manganese ion binding	16	5	1.17	0.00455	MF	evm.model.Contig11642.434;evm.model.Contig166914.7;evm.model.Contig2685.1084;evm.model.Contig5386.945;evm.model.Contig6055.279	0.0471178	0.0049456
S2seed, S2sc, S3sc, S4sc	turquoise			GO:0006914	autophagy	19	8	1.84	0.00022	BP	evm.model.Contig2581.217;evm.model.Contig2685.288;evm.model.Contig29751.49;evm.model.Contig5252.491;evm.model.Contig5373.410;evm.model.Contig5386.565;evm.model.Contig5483.169;evm.model.Contig9220.906	0.0379133	0.00590842
				GO:0061919	process utilizing autophagic mechanism	19	8	1.84	0.00022	BP	evm.model.Contig2581.217;evm.model.Contig2685.288;evm.model.Contig29751.49;evm.model.Contig5252.491;evm.model.Contig5373.410;evm.model.Contig5386.565;evm.model.Contig5483.169;evm.model.Contig9220.906	0.0379133	0.00590842
				GO:0003995	acyl-CoA dehydrogenase activity	9	6	0.88	5.7e-05	MF	evm.model.Contig10660.509;evm.model.Contig11642.349;evm.model.Contig5252.363;evm.model.Contig5373.324;evm.model.Contig9220.177;evm.model.Contig9867.61	0.029469	0.00443131
				GO:0070011	peptidase activity, acting on L-amino acid peptides	348	54	34.17	0.00044	MF	evm.model.Contig10143.103;evm.model.Contig10143.400;evm.model.Contig10143.476;evm.model.Contig10143.870;evm.model.Contig10143.973;evm.model.Contig10143.999;evm.model.Contig10440.61;evm.model.Contig10660.148;evm.model.Contig10660.328;evm.model.Contig10660.453;evm.model.Contig11642.396;evm.model.Contig11642.487;evm.model.Contig11642.94;evm.model.Contig14326.254;evm.model.Contig14326.719;evm.model.C…	0.048598	0.0398818
				GO:0008233	peptidase activity	365	56	35.83	0.00047	MF	evm.model.Contig10143.103;evm.model.Contig10143.400;evm.model.Contig10143.476;evm.model.Contig10143.870;evm.model.Contig10143.973;evm.model.Contig10143.999;evm.model.Contig10440.61;evm.model.Contig10660.148;evm.model.Contig10660.328;evm.model.Contig10660.453;evm.model.Contig11642.396;evm.model.Contig11642.487;evm.model.Contig11642.94;evm.model.Contig14326.254;evm.model.Contig14326.719;evm.model.C…	0.048598	0.0413589
	lightcyan			GO:0006464	cellular protein modification process	1095	37	16.29	6.2e-07	BP	evm.model.Contig11642.1319;evm.model.Contig11642.1597;evm.model.Contig11642.330;evm.model.Contig11642.479;evm.model.Contig11642.920;evm.model.Contig12381.256;evm.model.Contig12381.615;evm.model.Contig12381.75_evm.model.Contig12381.76;evm.model.Contig14326.383;evm.model.Contig2581.44_evm.model.Contig2581.45;evm.model.Contig2685.1053;evm.model.Contig2685.1246;evm.model.Contig2685.42;evm.model.Conti…	2.64533e-05	0.159483
				GO:0036211	protein modification process	1095	37	16.29	6.2e-07	BP	evm.model.Contig11642.1319;evm.model.Contig11642.1597;evm.model.Contig11642.330;evm.model.Contig11642.479;evm.model.Contig11642.920;evm.model.Contig12381.256;evm.model.Contig12381.615;evm.model.Contig12381.75_evm.model.Contig12381.76;evm.model.Contig14326.383;evm.model.Contig2581.44_evm.model.Contig2581.45;evm.model.Contig2685.1053;evm.model.Contig2685.1246;evm.model.Contig2685.42;evm.model.Conti…	2.64533e-05	0.159483
				GO:0006468	protein phosphorylation	865	32	12.86	6.4e-07	BP	evm.model.Contig11642.1319;evm.model.Contig11642.1597;evm.model.Contig11642.330;evm.model.Contig11642.479;evm.model.Contig11642.920;evm.model.Contig12381.256;evm.model.Contig12381.615;evm.model.Contig12381.75_evm.model.Contig12381.76;evm.model.Contig14326.383;evm.model.Contig2581.44_evm.model.Contig2581.45;evm.model.Contig2685.1053;evm.model.Contig2685.1246;evm.model.Contig2685.42;evm.model.Conti…	2.64533e-05	0.137931
				GO:0043412	macromolecule modification	1147	37	17.06	1.9e-06	BP	evm.model.Contig11642.1319;evm.model.Contig11642.1597;evm.model.Contig11642.330;evm.model.Contig11642.479;evm.model.Contig11642.920;evm.model.Contig12381.256;evm.model.Contig12381.615;evm.model.Contig12381.75_evm.model.Contig12381.76;evm.model.Contig14326.383;evm.model.Contig2581.44_evm.model.Contig2581.45;evm.model.Contig2685.1053;evm.model.Contig2685.1246;evm.model.Contig2685.42;evm.model.Conti…	5.31429e-05	0.159483
				GO:0016310	phosphorylation	960	33	14.28	2.2e-06	BP	evm.model.Contig11642.1319;evm.model.Contig11642.1597;evm.model.Contig11642.330;evm.model.Contig11642.479;evm.model.Contig11642.920;evm.model.Contig12381.256;evm.model.Contig12381.615;evm.model.Contig12381.75_evm.model.Contig12381.76;evm.model.Contig14326.383;evm.model.Contig2581.44_evm.model.Contig2581.45;evm.model.Contig2685.1053;evm.model.Contig2685.1246;evm.model.Contig2685.42;evm.model.Conti…	5.31429e-05	0.142241
				GO:0006796	phosphate-containing compound metabolic process	1217	38	18.1	3e-06	BP	evm.model.Contig10660.515;evm.model.Contig11642.1319;evm.model.Contig11642.1597;evm.model.Contig11642.330;evm.model.Contig11642.479;evm.model.Contig11642.920;evm.model.Contig12381.256;evm.model.Contig12381.396;evm.model.Contig12381.615;evm.model.Contig12381.75_evm.model.Contig12381.76;evm.model.Contig14326.383;evm.model.Contig2581.44_evm.model.Contig2581.45;evm.model.Contig2685.1053;evm.model.Con…	5.31429e-05	0.163793
				GO:0006793	phosphorus metabolic process	1218	38	18.11	3e-06	BP	evm.model.Contig10660.515;evm.model.Contig11642.1319;evm.model.Contig11642.1597;evm.model.Contig11642.330;evm.model.Contig11642.479;evm.model.Contig11642.920;evm.model.Contig12381.256;evm.model.Contig12381.396;evm.model.Contig12381.615;evm.model.Contig12381.75_evm.model.Contig12381.76;evm.model.Contig14326.383;evm.model.Contig2581.44_evm.model.Contig2581.45;evm.model.Contig2685.1053;evm.model.Con…	5.31429e-05	0.163793
				GO:1901564	organonitrogen compound metabolic process	2602	55	38.7	0.0011	BP	evm.model.Contig10660.29;evm.model.Contig10660.515;evm.model.Contig11642.1319;evm.model.Contig11642.1360;evm.model.Contig11642.1597;evm.model.Contig11642.330;evm.model.Contig11642.474;evm.model.Contig11642.479;evm.model.Contig11642.920;evm.model.Contig12381.256;evm.model.Contig12381.396;evm.model.Contig12381.615;evm.model.Contig12381.75_evm.model.Contig12381.76;evm.model.Contig14326.1057;evm.mode…	0.00974286	0.237069
				GO:0019538	protein metabolic process	2062	46	30.67	0.0012	BP	evm.model.Contig10660.29;evm.model.Contig11642.1319;evm.model.Contig11642.1360;evm.model.Contig11642.1597;evm.model.Contig11642.330;evm.model.Contig11642.479;evm.model.Contig11642.920;evm.model.Contig12381.256;evm.model.Contig12381.615;evm.model.Contig12381.75_evm.model.Contig12381.76;evm.model.Contig14326.383;evm.model.Contig2581.44_evm.model.Contig2581.45;evm.model.Contig2685.1053;evm.model.Con…	0.00992	0.198276
				GO:0044267	cellular protein metabolic process	1746	39	25.97	0.0035	BP	evm.model.Contig11642.1319;evm.model.Contig11642.1360;evm.model.Contig11642.1597;evm.model.Contig11642.330;evm.model.Contig11642.479;evm.model.Contig11642.920;evm.model.Contig12381.256;evm.model.Contig12381.615;evm.model.Contig12381.75_evm.model.Contig12381.76;evm.model.Contig14326.383;evm.model.Contig2581.44_evm.model.Contig2581.45;evm.model.Contig2685.1053;evm.model.Contig2685.1246;evm.model.Co…	0.0255294	0.168103
				GO:0004672	protein kinase activity	866	34	15.5	1.1e-05	MF	evm.model.Contig11642.1319;evm.model.Contig11642.1597;evm.model.Contig11642.330;evm.model.Contig11642.479;evm.model.Contig11642.920;evm.model.Contig12381.256;evm.model.Contig12381.615;evm.model.Contig12381.75_evm.model.Contig12381.76;evm.model.Contig14326.383;evm.model.Contig2581.44_evm.model.Contig2581.45;evm.model.Contig2685.1053;evm.model.Contig2685.1246;evm.model.Contig2685.42;evm.model.Conti…	0.0001705	0.146552
				GO:0004713	protein tyrosine kinase activity	767	31	13.73	1.6e-05	MF	evm.model.Contig11642.1319;evm.model.Contig11642.1597;evm.model.Contig11642.330;evm.model.Contig11642.479;evm.model.Contig11642.920;evm.model.Contig12381.256;evm.model.Contig12381.615;evm.model.Contig12381.75_evm.model.Contig12381.76;evm.model.Contig14326.383;evm.model.Contig2581.44_evm.model.Contig2581.45;evm.model.Contig2685.1053;evm.model.Contig2685.1246;evm.model.Contig2685.42;evm.model.Conti…	0.000220444	0.133621
				GO:0140096	catalytic activity, acting on a protein	1433	46	25.65	4.9e-05	MF	evm.model.Contig10660.29;evm.model.Contig11642.1319;evm.model.Contig11642.1462;evm.model.Contig11642.1597;evm.model.Contig11642.330;evm.model.Contig11642.479;evm.model.Contig11642.920;evm.model.Contig12381.256;evm.model.Contig12381.615;evm.model.Contig12381.75_evm.model.Contig12381.76;evm.model.Contig14326.383;evm.model.Contig2581.44_evm.model.Contig2581.45;evm.model.Contig2685.1053;evm.model.Con…	0.0006076	0.198276
				GO:0016773	phosphotransferase activity, alcohol group as acceptor	968	34	17.32	0.0001	MF	evm.model.Contig11642.1319;evm.model.Contig11642.1597;evm.model.Contig11642.330;evm.model.Contig11642.479;evm.model.Contig11642.920;evm.model.Contig12381.256;evm.model.Contig12381.615;evm.model.Contig12381.75_evm.model.Contig12381.76;evm.model.Contig14326.383;evm.model.Contig2581.44_evm.model.Contig2581.45;evm.model.Contig2685.1053;evm.model.Contig2685.1246;evm.model.Contig2685.42;evm.model.Conti…	0.00112727	0.146552
				GO:0016301	kinase activity	1019	35	18.24	0.00013	MF	evm.model.Contig10660.37;evm.model.Contig11642.1319;evm.model.Contig11642.1597;evm.model.Contig11642.330;evm.model.Contig11642.479;evm.model.Contig11642.920;evm.model.Contig12381.256;evm.model.Contig12381.615;evm.model.Contig12381.75_evm.model.Contig12381.76;evm.model.Contig14326.383;evm.model.Contig2581.44_evm.model.Contig2581.45;evm.model.Contig2685.1053;evm.model.Contig2685.1246;evm.model.Cont…	0.00134333	0.150862
				GO:0005515	protein binding	2891	74	51.74	0.00034	MF	evm.model.Contig10143.1154;evm.model.Contig10143.563;evm.model.Contig10143.578;evm.model.Contig10660.34;evm.model.Contig10660.380;evm.model.Contig10660.505;evm.model.Contig11518.31;evm.model.Contig11642.1011;evm.model.Contig11642.1034;evm.model.Contig11642.1081;evm.model.Contig11642.1180;evm.model.Contig11642.1219;evm.model.Contig11642.1240;evm.model.Contig11642.1278;evm.model.Contig11642.1319;ev…	0.00324308	0.318966
				GO:0016772	transferase activity, transferring phosphorus-containing groups	1166	35	20.87	0.00153	MF	evm.model.Contig10660.37;evm.model.Contig11642.1319;evm.model.Contig11642.1597;evm.model.Contig11642.330;evm.model.Contig11642.479;evm.model.Contig11642.920;evm.model.Contig12381.256;evm.model.Contig12381.615;evm.model.Contig12381.75_evm.model.Contig12381.76;evm.model.Contig14326.383;evm.model.Contig2581.44_evm.model.Contig2581.45;evm.model.Contig2685.1053;evm.model.Contig2685.1246;evm.model.Cont…	0.0118575	0.150862
S3coty	darkgrey			GO:0043412	macromolecule modification	1147	20	8.75	0.0002	BP	evm.model.Contig10143.77;evm.model.Contig11642.731;evm.model.Contig2581.421;evm.model.Contig2581.787;evm.model.Contig2685.176;evm.model.Contig2685.264;evm.model.Contig2685.351;evm.model.Contig2712.1085;evm.model.Contig2712.16;evm.model.Contig3098.90;evm.model.Contig5252.522;evm.model.Contig5387.271;evm.model.Contig5387.332;evm.model.Contig5483.883;evm.model.Contig6055.351;evm.model.Contig7167.259…	0.0202	0.168067
				GO:0006464	cellular protein modification process	1095	18	8.35	0.00096	BP	evm.model.Contig10143.77;evm.model.Contig11642.731;evm.model.Contig2581.421;evm.model.Contig2581.787;evm.model.Contig2685.176;evm.model.Contig2685.264;evm.model.Contig2685.351;evm.model.Contig2712.16;evm.model.Contig3098.90;evm.model.Contig5252.522;evm.model.Contig5387.271;evm.model.Contig5483.883;evm.model.Contig6055.351;evm.model.Contig7167.259;evm.model.Contig8573.183;evm.model.Contig9220.866;…	0.02424	0.15126
				GO:0036211	protein modification process	1095	18	8.35	0.00096	BP	evm.model.Contig10143.77;evm.model.Contig11642.731;evm.model.Contig2581.421;evm.model.Contig2581.787;evm.model.Contig2685.176;evm.model.Contig2685.264;evm.model.Contig2685.351;evm.model.Contig2712.16;evm.model.Contig3098.90;evm.model.Contig5252.522;evm.model.Contig5387.271;evm.model.Contig5483.883;evm.model.Contig6055.351;evm.model.Contig7167.259;evm.model.Contig8573.183;evm.model.Contig9220.866;…	0.02424	0.15126
				GO:0046983	protein dimerization activity	313	10	2.85	0.00056	MF	evm.model.Contig10143.1226;evm.model.Contig10143.156;evm.model.Contig10660.744;evm.model.Contig11642.891;evm.model.Contig2581.527;evm.model.Contig5373.10;evm.model.Contig5387.505;evm.model.Contig8573.312;evm.model.Contig9220.734;evm.model.Contig9220.874	0.02424	0.0840336
ovule	salmon			GO:0006457	protein folding	131	11	2.26	1.5e-05	BP	evm.model.Contig10143.825;evm.model.Contig11642.1401;evm.model.Contig14326.265;evm.model.Contig14326.81;evm.model.Contig2712.1132;evm.model.Contig5252.1055;evm.model.Contig5252.1289;evm.model.Contig5252.134;evm.model.Contig5373.374;evm.model.Contig5386.364;evm.model.Contig64.36	0.001185	0.042471
				GO:0019222	regulation of metabolic process	79	7	1.37	0.00041	BP	evm.model.Contig10143.396;evm.model.Contig10143.598;evm.model.Contig10660.677;evm.model.Contig2685.580;evm.model.Contig3098.260;evm.model.Contig5373.225;evm.model.Contig7167.176	0.0215933	0.027027
				GO:0051082	unfolded protein binding	58	8	1.08	1.1e-05	MF	evm.model.Contig10143.825;evm.model.Contig14326.265;evm.model.Contig14326.81;evm.model.Contig2581.381;evm.model.Contig2712.1132;evm.model.Contig5252.1055;evm.model.Contig5252.134;evm.model.Contig7167.266	0.001185	0.030888
				GO:0005509	calcium ion binding	193	11	3.59	0.00096	MF	evm.model.Contig11642.343;evm.model.Contig11642.798;evm.model.Contig14326.265;evm.model.Contig14326.347;evm.model.Contig2712.1132;evm.model.Contig2712.898;evm.model.Contig33180.113;evm.model.Contig5386.635;evm.model.Contig5483.58;evm.model.Contig8573.438;evm.model.Contig9868.638	0.03792	0.042471
				GO:0006468	protein phosphorylation	865	55	33.1	8.7e-05	BP	evm.model.Contig10143.296;evm.model.Contig10143.469;evm.model.Contig10660.280;evm.model.Contig10660.565;evm.model.Contig11642.1047;evm.model.Contig11642.1602;evm.model.Contig11642.261;evm.model.Contig11642.939;evm.model.Contig12381.541;evm.model.Contig12381.558;evm.model.Contig14326.424;evm.model.Contig2581.302;evm.model.Contig2581.428;evm.model.Contig2685.1023;evm.model.Contig2685.349;evm.model.…	0.0102225	0.0951557
	black			GO:0006464	cellular protein modification process	1095	64	41.9	0.00025	BP	evm.model.Contig10143.296;evm.model.Contig10143.469;evm.model.Contig10660.266;evm.model.Contig10660.280;evm.model.Contig10660.565;evm.model.Contig11642.1047;evm.model.Contig11642.1602;evm.model.Contig11642.261;evm.model.Contig11642.939;evm.model.Contig12381.541;evm.model.Contig12381.558;evm.model.Contig14326.424;evm.model.Contig2581.302;evm.model.Contig2581.428;evm.model.Contig2581.68;evm.model.C…	0.0121417	0.110727
				GO:0036211	protein modification process	1095	64	41.9	0.00025	BP	evm.model.Contig10143.296;evm.model.Contig10143.469;evm.model.Contig10660.266;evm.model.Contig10660.280;evm.model.Contig10660.565;evm.model.Contig11642.1047;evm.model.Contig11642.1602;evm.model.Contig11642.261;evm.model.Contig11642.939;evm.model.Contig12381.541;evm.model.Contig12381.558;evm.model.Contig14326.424;evm.model.Contig2581.302;evm.model.Contig2581.428;evm.model.Contig2581.68;evm.model.C…	0.0121417	0.110727
				GO:0043412	macromolecule modification	1147	66	43.89	0.00031	BP	evm.model.Contig10143.296;evm.model.Contig10143.469;evm.model.Contig10660.266;evm.model.Contig10660.280;evm.model.Contig10660.565;evm.model.Contig10660.705;evm.model.Contig11642.1047;evm.model.Contig11642.1602;evm.model.Contig11642.261;evm.model.Contig11642.939;evm.model.Contig12381.541;evm.model.Contig12381.558;evm.model.Contig14326.424;evm.model.Contig2581.302;evm.model.Contig2581.428;evm.model…	0.0121417	0.114187
				GO:0016310	phosphorylation	960	56	36.73	0.0007	BP	evm.model.Contig10143.296;evm.model.Contig10143.469;evm.model.Contig10660.280;evm.model.Contig10660.565;evm.model.Contig11642.1047;evm.model.Contig11642.1602;evm.model.Contig11642.261;evm.model.Contig11642.939;evm.model.Contig12381.541;evm.model.Contig12381.558;evm.model.Contig14326.424;evm.model.Contig2581.302;evm.model.Contig2581.428;evm.model.Contig2685.1023;evm.model.Contig2685.349;evm.model.…	0.0235	0.0968858
				GO:0016987	sigma factor activity	8	5	0.33	6e-06	MF	evm.model.Contig10143.1127;evm.model.Contig2712.1381;evm.model.Contig5252.1137;evm.model.Contig5387.307;evm.model.Contig5483.725	0.00141	0.00865052
				GO:0004713	protein tyrosine kinase activity	767	52	31.77	0.00028	MF	evm.model.Contig10143.296;evm.model.Contig10143.469;evm.model.Contig10660.280;evm.model.Contig10660.565;evm.model.Contig11642.1047;evm.model.Contig11642.1602;evm.model.Contig11642.261;evm.model.Contig11642.939;evm.model.Contig12381.558;evm.model.Contig14326.424;evm.model.Contig2581.302;evm.model.Contig2581.428;evm.model.Contig2685.1023;evm.model.Contig2685.349;evm.model.Contig2685.97;evm.model.Co…	0.0121417	0.0899654
				GO:0016301	kinase activity	1019	62	42.21	0.00127	MF	evm.model.Contig10143.1253;evm.model.Contig10143.296;evm.model.Contig10143.469;evm.model.Contig10660.280;evm.model.Contig10660.565;evm.model.Contig10660.88;evm.model.Contig11642.1047;evm.model.Contig11642.1458;evm.model.Contig11642.1602;evm.model.Contig11642.261;evm.model.Contig11642.803;evm.model.Contig11642.939;evm.model.Contig12381.541;evm.model.Contig12381.558;evm.model.Contig14326.424;evm.mo…	0.0373062	0.107266
				GO:0004672	protein kinase activity	866	54	35.87	0.00155	MF	evm.model.Contig10143.296;evm.model.Contig10143.469;evm.model.Contig10660.280;evm.model.Contig10660.565;evm.model.Contig11642.1047;evm.model.Contig11642.1602;evm.model.Contig11642.261;evm.model.Contig11642.939;evm.model.Contig12381.541;evm.model.Contig12381.558;evm.model.Contig14326.424;evm.model.Contig2581.302;evm.model.Contig2581.428;evm.model.Contig2685.1023;evm.model.Contig2685.349;evm.model.…	0.037835	0.0934256
				GO:0016773	phosphotransferase activity, alcohol group as acceptor	968	59	40.09	0.00161	MF	evm.model.Contig10143.1253;evm.model.Contig10143.296;evm.model.Contig10143.469;evm.model.Contig10660.280;evm.model.Contig10660.565;evm.model.Contig11642.1047;evm.model.Contig11642.1458;evm.model.Contig11642.1602;evm.model.Contig11642.261;evm.model.Contig11642.803;evm.model.Contig11642.939;evm.model.Contig12381.541;evm.model.Contig12381.558;evm.model.Contig14326.424;evm.model.Contig2581.302;evm.mo…	0.037835	0.102076
				GO:0003700	DNA-binding transcription factor activity	523	36	21.66	0.0019	MF	evm.model.Contig10143.1127;evm.model.Contig10143.1172;evm.model.Contig10143.1199;evm.model.Contig10660.158;evm.model.Contig11518.24;evm.model.Contig11642.1464;evm.model.Contig14326.239;evm.model.Contig14326.861;evm.model.Contig2581.188;evm.model.Contig2581.257;evm.model.Contig2581.322;evm.model.Contig2685.767;evm.model.Contig2712.1157;evm.model.Contig2712.1381;evm.model.Contig2800.436;evm.model.C…	0.0405909	0.0622837
s4axis	darkturquoise			GO:0006325	chromatin organization	91	10	0.89	1.5e-08	BP	evm.model.Contig10143.1109;evm.model.Contig11642.206;evm.model.Contig11642.214;evm.model.Contig12381.263;evm.model.Contig149018.1;evm.model.Contig2581.639;evm.model.Contig5373.258;evm.model.Contig5386.1130;evm.model.Contig9867.100;evm.model.Contig9867.254	1.677e-06	0.0724638
s1ovule				GO:0006334	nucleosome assembly	64	8	0.63	1.7e-07	BP	evm.model.Contig11642.206;evm.model.Contig11642.214;evm.model.Contig12381.263;evm.model.Contig149018.1;evm.model.Contig2581.639;evm.model.Contig5373.258;evm.model.Contig5386.1130;evm.model.Contig9867.100	2.46273e-06	0.057971
s2seed				GO:0031497	chromatin assembly	64	8	0.63	1.7e-07	BP	evm.model.Contig11642.206;evm.model.Contig11642.214;evm.model.Contig12381.263;evm.model.Contig149018.1;evm.model.Contig2581.639;evm.model.Contig5373.258;evm.model.Contig5386.1130;evm.model.Contig9867.100	2.46273e-06	0.057971
s2seedcoat				GO:0034728	nucleosome organization	64	8	0.63	1.7e-07	BP	evm.model.Contig11642.206;evm.model.Contig11642.214;evm.model.Contig12381.263;evm.model.Contig149018.1;evm.model.Contig2581.639;evm.model.Contig5373.258;evm.model.Contig5386.1130;evm.model.Contig9867.100	2.46273e-06	0.057971
				GO:0006333	chromatin assembly or disassembly	65	8	0.64	1.9e-07	BP	evm.model.Contig11642.206;evm.model.Contig11642.214;evm.model.Contig12381.263;evm.model.Contig149018.1;evm.model.Contig2581.639;evm.model.Contig5373.258;evm.model.Contig5386.1130;evm.model.Contig9867.100	2.46273e-06	0.057971
				GO:0065004	protein-DNA complex assembly	66	8	0.65	2.1e-07	BP	evm.model.Contig11642.206;evm.model.Contig11642.214;evm.model.Contig12381.263;evm.model.Contig149018.1;evm.model.Contig2581.639;evm.model.Contig5373.258;evm.model.Contig5386.1130;evm.model.Contig9867.100	2.46273e-06	0.057971
				GO:0071824	protein-DNA complex subunit organization	66	8	0.65	2.1e-07	BP	evm.model.Contig11642.206;evm.model.Contig11642.214;evm.model.Contig12381.263;evm.model.Contig149018.1;evm.model.Contig2581.639;evm.model.Contig5373.258;evm.model.Contig5386.1130;evm.model.Contig9867.100	2.46273e-06	0.057971
				GO:0051276	chromosome organization	122	10	1.19	2.5e-07	BP	evm.model.Contig10143.1109;evm.model.Contig11642.206;evm.model.Contig11642.214;evm.model.Contig12381.263;evm.model.Contig149018.1;evm.model.Contig2581.639;evm.model.Contig5373.258;evm.model.Contig5386.1130;evm.model.Contig9867.100;evm.model.Contig9867.254	2.48077e-06	0.0724638
				GO:0006323	DNA packaging	68	8	0.67	2.7e-07	BP	evm.model.Contig11642.206;evm.model.Contig11642.214;evm.model.Contig12381.263;evm.model.Contig149018.1;evm.model.Contig2581.639;evm.model.Contig5373.258;evm.model.Contig5386.1130;evm.model.Contig9867.100	2.48786e-06	0.057971
				GO:0071103	DNA conformation change	79	8	0.77	8.7e-07	BP	evm.model.Contig11642.206;evm.model.Contig11642.214;evm.model.Contig12381.263;evm.model.Contig149018.1;evm.model.Contig2581.639;evm.model.Contig5373.258;evm.model.Contig5386.1130;evm.model.Contig9867.100	7.482e-06	0.057971
				GO:0034622	cellular protein-containing complex assembly	125	9	1.22	3.1e-06	BP	evm.model.Contig11642.206;evm.model.Contig11642.214;evm.model.Contig12381.263;evm.model.Contig149018.1;evm.model.Contig2581.639;evm.model.Contig5373.258;evm.model.Contig5386.1130;evm.model.Contig9220.539;evm.model.Contig9867.100	2.35235e-05	0.0652174
				GO:0022607	cellular component assembly	169	10	1.65	5.1e-06	BP	evm.model.Contig11642.206;evm.model.Contig11642.214;evm.model.Contig12381.263;evm.model.Contig149018.1;evm.model.Contig16184.43;evm.model.Contig2581.639;evm.model.Contig5373.258;evm.model.Contig5386.1130;evm.model.Contig9220.539;evm.model.Contig9867.100	3.655e-05	0.0724638
				GO:0065003	protein-containing complex assembly	137	9	1.34	6.7e-06	BP	evm.model.Contig11642.206;evm.model.Contig11642.214;evm.model.Contig12381.263;evm.model.Contig149018.1;evm.model.Contig2581.639;evm.model.Contig5373.258;evm.model.Contig5386.1130;evm.model.Contig9220.539;evm.model.Contig9867.100	4.54895e-05	0.0652174
				GO:0044085	cellular component biogenesis	222	11	2.17	9.2e-06	BP	evm.model.Contig10143.485;evm.model.Contig11642.206;evm.model.Contig11642.214;evm.model.Contig12381.263;evm.model.Contig149018.1;evm.model.Contig16184.43;evm.model.Contig2581.639;evm.model.Contig5373.258;evm.model.Contig5386.1130;evm.model.Contig9220.539;evm.model.Contig9867.100	5.934e-05	0.0797101
				GO:0006996	organelle organization	236	11	2.31	1.6e-05	BP	evm.model.Contig10143.1109;evm.model.Contig11642.206;evm.model.Contig11642.214;evm.model.Contig12381.263;evm.model.Contig149018.1;evm.model.Contig2581.639;evm.model.Contig5373.258;evm.model.Contig5386.1130;evm.model.Contig75.69;evm.model.Contig9867.100;evm.model.Contig9867.254	9.82857e-05	0.0797101
				GO:0071840	cellular component organization or biogenesis	453	15	4.43	2.6e-05	BP	evm.model.Contig10143.1109;evm.model.Contig10143.485;evm.model.Contig11642.206;evm.model.Contig11642.214;evm.model.Contig12381.263;evm.model.Contig12381.628;evm.model.Contig149018.1;evm.model.Contig16184.43;evm.model.Contig2581.639;evm.model.Contig5373.258;evm.model.Contig5386.1130;evm.model.Contig75.69;evm.model.Contig9220.539;evm.model.Contig9867.100;evm.model.Contig9867.254	0.000152455	0.108696
				GO:0016043	cellular component organization	401	14	3.92	2.8e-05	BP	evm.model.Contig10143.1109;evm.model.Contig11642.206;evm.model.Contig11642.214;evm.model.Contig12381.263;evm.model.Contig12381.628;evm.model.Contig149018.1;evm.model.Contig16184.43;evm.model.Contig2581.639;evm.model.Contig5373.258;evm.model.Contig5386.1130;evm.model.Contig75.69;evm.model.Contig9220.539;evm.model.Contig9867.100;evm.model.Contig9867.254	0.000157044	0.101449
				GO:0043933	protein-containing complex subunit organization	165	9	1.61	3e-05	BP	evm.model.Contig11642.206;evm.model.Contig11642.214;evm.model.Contig12381.263;evm.model.Contig149018.1;evm.model.Contig2581.639;evm.model.Contig5373.258;evm.model.Contig5386.1130;evm.model.Contig9220.539;evm.model.Contig9867.100	0.00016125	0.0652174
				GO:0006457	protein folding	131	6	1.28	0.0017	BP	evm.model.Contig10143.1210;evm.model.Contig5386.162;evm.model.Contig5483.582;evm.model.Contig7167.540;evm.model.Contig8573.334;evm.model.Contig9220.569	0.008772	0.0434783
				GO:0000785	chromatin	66	9	0.74	2.6e-08	CC	evm.model.Contig11642.206;evm.model.Contig11642.214;evm.model.Contig12381.263;evm.model.Contig149018.1;evm.model.Contig2581.639;evm.model.Contig5373.258;evm.model.Contig5386.1130;evm.model.Contig9867.100;evm.model.Contig9867.254	1.677e-06	0.0652174
				GO:0000786	nucleosome	59	8	0.66	1.8e-07	CC	evm.model.Contig11642.206;evm.model.Contig11642.214;evm.model.Contig12381.263;evm.model.Contig149018.1;evm.model.Contig2581.639;evm.model.Contig5373.258;evm.model.Contig5386.1130;evm.model.Contig9867.100	2.46273e-06	0.057971
				GO:0032993	protein-DNA complex	59	8	0.66	1.8e-07	CC	evm.model.Contig11642.206;evm.model.Contig11642.214;evm.model.Contig12381.263;evm.model.Contig149018.1;evm.model.Contig2581.639;evm.model.Contig5373.258;evm.model.Contig5386.1130;evm.model.Contig9867.100	2.46273e-06	0.057971
				GO:0044427	chromosomal part	83	9	0.93	2e-07	CC	evm.model.Contig11642.206;evm.model.Contig11642.214;evm.model.Contig12381.263;evm.model.Contig149018.1;evm.model.Contig2581.639;evm.model.Contig5373.258;evm.model.Contig5386.1130;evm.model.Contig9867.100;evm.model.Contig9867.254	2.46273e-06	0.0652174
				GO:0044815	DNA packaging complex	61	8	0.68	2.3e-07	CC	evm.model.Contig11642.206;evm.model.Contig11642.214;evm.model.Contig12381.263;evm.model.Contig149018.1;evm.model.Contig2581.639;evm.model.Contig5373.258;evm.model.Contig5386.1130;evm.model.Contig9867.100	2.4725e-06	0.057971
				GO:0005694	chromosome	100	9	1.12	1e-06	CC	evm.model.Contig11642.206;evm.model.Contig11642.214;evm.model.Contig12381.263;evm.model.Contig149018.1;evm.model.Contig2581.639;evm.model.Contig5373.258;evm.model.Contig5386.1130;evm.model.Contig9867.100;evm.model.Contig9867.254	8.0625e-06	0.0652174
				GO:0005634	nucleus	708	15	7.91	0.0074	CC	evm.model.Contig10143.1109;evm.model.Contig11642.206;evm.model.Contig11642.214;evm.model.Contig12381.199;evm.model.Contig12381.263;evm.model.Contig14326.252;evm.model.Contig149018.1;evm.model.Contig2581.639;evm.model.Contig2712.704;evm.model.Contig36408.7;evm.model.Contig5373.258;evm.model.Contig5386.1130;evm.model.Contig5483.550;evm.model.Contig8624.215;evm.model.Contig9867.254	0.0353556	0.108696
				GO:0003676	nucleic acid binding	1807	28	17.25	0.0054	MF	evm.model.Contig10143.1009;evm.model.Contig10143.438;evm.model.Contig10143.89;evm.model.Contig10440.19;evm.model.Contig11642.206;evm.model.Contig11642.214;evm.model.Contig11642.406;evm.model.Contig12381.263;evm.model.Contig14326.341;evm.model.Contig14326.462;evm.model.Contig149018.1;evm.model.Contig2581.639;evm.model.Contig2581.727;evm.model.Contig2685.104;evm.model.Contig2712.1682;evm.model.Cont…	0.0267923	0.202899
	skyblue			GO:0006457	protein folding	131	5	0.53	0.00017	BP	evm.model.Contig10143.8;evm.model.Contig11642.1311;evm.model.Contig2712.1350;evm.model.Contig5387.409;evm.model.Contig75.156	0.00527	0.0769231
				GO:0051082	unfolded protein binding	58	5	0.25	4.9e-06	MF	evm.model.Contig2712.1350;evm.model.Contig29751.258;evm.model.Contig5252.1153;evm.model.Contig5373.476;evm.model.Contig5387.409	0.0003038	0.0769231

## Sheet: Table S4
Table S4 High expressed genes (HEGs) in each viviparous tissue
Tissue	Gene ID	Expression Counts	Funtional description
S1ovule	evm.model.Contig5386.856	20815.6	unknown function
	evm.model.Contig64.18	16475.4	Fatty acid hydroxylase superfamily isoform 1; K15404 aldehyde decarbonylase [EC:4.1.99.5] (A)
	evm.model.Contig9868.127	12956.9	floral homeotic protein DEFICIENS-like; K09264 MADS-box transcription factor, plant (A)
	evm.model.Contig5252.1259	5740.6	hypothetical protein; K00679 phospholipid:diacylglycerol acyltransferase [EC:2.3.1.158] (A)
	evm.model.Contig9220.1060	3344.84	polygalacturonase At1g48100-like; K01184 polygalacturonase [EC:3.2.1.15] (A)
	evm.model.Contig33180.79	2117.97	PA-domain containing subtilase family protein [Theobroma cacao]
	evm.model.Contig5252.641	2021.49	hypothetical protein; K11816 indole-3-pyruvate monooxygenase [EC:1.14.13.168] (A)
	evm.model.Contig3098.109	1790.58	unknown function
	evm.model.Contig12381.284	1332.44	hypothetical protein CICLE_v10023477mg [Citrus clementina]
	evm.model.Contig29751.223	1331.2	plasma membrane ATPase-like; K01535 H+-transporting ATPase [EC:3.6.3.6] (A)
	evm.model.Contig12381.445	1171.17	uncharacterized LOC103401427; K13415 protein brassinosteroid insensitive 1 [EC:2.7.10.1 2.7.11.1] (A)
	evm.model.Contig9867.107	1039.55	PREDICTED: zinc-finger homeodomain protein 2-like [Jatropha curcas]
	evm.model.Contig9867.830	980.184	hypothetical protein POPTR_0001s34870g [Populus trichocarpa]
	evm.model.Contig5373.189	926.111	truncated transcription factor CAULIFLOWER A-like; K09264 MADS-box transcription factor, plant (A)
	evm.model.Contig2712.208	868.032	uncharacterized LOC100839967; K15095 (+)-neomenthol dehydrogenase [EC:1.1.1.208] (A)
	evm.model.Contig9868.715	799.592	SORBIDRAFT_02g000390, Sb02g000390; hypothetical protein; K04730 interleukin-1 receptor-associated kinase 1 [EC:2.7.11.1] (A)
	evm.model.Contig9220.358	743.395	hypothetical protein; K11982 E3 ubiquitin-protein ligase RNF115/126 [EC:2.3.2.27] (A)
	evm.model.Contig2712.1993	663.812	conserved hypothetical protein [Ricinus communis]
	evm.model.Contig2800.406	649.07	PREDICTED: cation/H(+) antiporter 18-like [Populus euphratica]
	evm.model.Contig5252.640	623.665	hypothetical protein; K11816 indole-3-pyruvate monooxygenase [EC:1.14.13.168] (A)
	evm.model.Contig5252.1220	542.739	POPTRDRAFT_571209; Glutamate dehydrogenase 1 family protein; K00261 glutamate dehydrogenase (NAD(P)+) [EC:1.4.1.3] (A)
	evm.model.Contig5482.23	511.782	POPTRDRAFT_711860; hypothetical protein; K01246 DNA-3-methyladenine glycosylase I [EC:3.2.2.20] (A)
	evm.model.Contig2712.311	508.27	basic helix-loop-helix family protein; K10863 aprataxin [EC:3.-.-.-] (A)
	evm.model.Contig5373.58	488.565	POPTRDRAFT_913328; hypothetical protein; K09840 9-cis-epoxycarotenoid dioxygenase [EC:1.13.11.51] (A)
	evm.model.Contig2581.290	455.58	PREDICTED: uncharacterized protein LOC105139699 [Populus euphratica]
	evm.model.Contig3364.267	360.68	Myb domain protein 62, putative; K09422 myb proto-oncogene protein, plant (A)
	evm.model.Contig10660.32	329.694	POPTRDRAFT_342257; cytochrome P450 CYP94A1 family protein; K13407 fatty acid omega-hydroxylase [EC:1.14.-.-] (A)
	evm.model.Contig5373.51	324.975	Uncharacterized protein TCM_040782 [Theobroma cacao]
	evm.model.Contig10143.782	276.667	PREDICTED: protein SHI RELATED SEQUENCE 1 [Jatropha curcas]
	evm.model.Contig11642.750	255.553	UDP-glycosyltransferase 73C1-like; K13496 UDP-glucosyl transferase 73C [EC:2.4.1.-] (A)
	evm.model.Contig5483.194	254.398	hypothetical protein POPTR_0018s10810g [Populus trichocarpa]
	evm.model.Contig9220.726	253.515	POPTRDRAFT_825432; vacuolar ATP synthase subunit E family protein; K02150 V-type H+-transporting ATPase subunit E (A)
	evm.model.Contig5386.151	191.939	DNA-directed RNA polymerase II subunit RPB1-like; K03006 DNA-directed RNA polymerase II subunit RPB1 [EC:2.7.7.6] (A)
	evm.model.Contig241634.1	188.948	Na(+)/H(+) antiporter, putative [Ricinus communis]
	evm.model.Contig5386.1069	179.263	floral homeotic protein AGAMOUS-like; K09264 MADS-box transcription factor, plant (A)
	evm.model.Contig7167.407	168.392	Plant-specific transcription factor YABBY family protein isoform 1 [Theobroma cacao]
	evm.model.Contig2712.1863	141.223	SEP1; developmental protein SEPALLATA 1; K09264 MADS-box transcription factor, plant (A)
	evm.model.Contig5252.1484	132.55	unknown function
	evm.model.Contig14326.284	132	myosin-11-like; K10352 myosin heavy chain (A)
	evm.model.Contig10143.646	119.768	POPTRDRAFT_559105; hypothetical protein; K09422 myb proto-oncogene protein, plant (A)
	evm.model.Contig12381.616	110.697	hypothetical protein; K14494 DELLA protein (A)
	evm.model.Contig5386.982	99.3849	xanthoxin dehydrogenase-like; K09841 xanthoxin dehydrogenase [EC:1.1.1.288] (A)
	evm.model.Contig5483.388	97.6039	monooxygenase, putative (EC:1.14.13.8); K11816 indole-3-pyruvate monooxygenase [EC:1.14.13.168] (A)
	evm.model.Contig5483.872	92.4164	pathogenesis-related genes transcriptional activator PTI6-like; K13434 pathogenesis-related genes transcriptional activator PTI6 (A)
	evm.model.Contig3098.312	88.442	hypothetical protein; K09422 myb proto-oncogene protein, plant (A)
	evm.model.Contig3230.200	84.7751	ABC transporter B family member 7; K05658 ATP-binding cassette, subfamily B (MDR/TAP), member 1 [EC:3.6.3.44] (A)
	evm.model.Contig9220.41	83.2635	polygalacturonase-like; K01213 galacturan 1,4-alpha-galacturonidase [EC:3.2.1.67] (A)
	evm.model.Contig7167.124	79.5709	uncharacterized LOC104424130; K12309 beta-galactosidase [EC:3.2.1.23] (A)
	evm.model.Contig9867.249	76.2876	serine/threonine-protein kinase BLUS1; K08835 serine/threonine-protein kinase OSR1/STK39 [EC:2.7.11.1] (A)
	evm.model.Contig10143.75	74.8153	cytochrome P450 716B1-like; K07437 cytochrome P450, family 26, subfamily A (A)
	evm.model.Contig5252.249	69.5884	unknown function
	evm.model.Contig9867.323	69.3241	unnamed protein product [Coffea canephora]
	evm.model.Contig9220.247	68.7273	POPTRDRAFT_653054; 18.2 kDa class I heat shock family protein; K13993 HSP20 family protein (A)
	evm.model.Contig5483.248	68.6636	SORBIDRAFT_01g014130, Sb01g014130; hypothetical protein; K14484 auxin-responsive protein IAA (A)
	evm.model.Contig33180.248	68.6564	PREDICTED: uncharacterized protein LOC105132228 [Populus euphratica]
	evm.model.Contig10143.381	63.9652	unknown function
	evm.model.Contig33180.395	63.2627	hypothetical protein; K01099 phosphatidylinositol-bisphosphatase [EC:3.1.3.36] (A)
	evm.model.Contig2712.837	58.4214	protein kinase 2B, chloroplastic-like; K04733 interleukin-1 receptor-associated kinase 4 [EC:2.7.11.1] (A)
	evm.model.Contig10440.30	57.4682	lecithin-cholesterol acyltransferase-like 1; K06129 lysophospholipase III [EC:3.1.1.5] (A)
	evm.model.Contig2712.824	55.6145	hypothetical protein; K05278 flavonol synthase [EC:1.14.11.23] (A)
	evm.model.Contig8573.391	52.1461	K-box region and MADS-box transcription factor family protein; K09264 MADS-box transcription factor, plant (A)
	evm.model.Contig9868.585	47.6797	hypothetical protein; K01051 pectinesterase [EC:3.1.1.11] (A)
	evm.model.Contig5386.1118	46.5914	serine/threonine-protein kinase CDL1-like; K04733 interleukin-1 receptor-associated kinase 4 [EC:2.7.11.1] (A)
	evm.model.Contig9220.74	45.4825	cytochrome P450 716B1-like; K07437 cytochrome P450, family 26, subfamily A (A)
	evm.model.Contig5252.498	43.9559	polygalacturonase At1g48100; K01213 galacturan 1,4-alpha-galacturonidase [EC:3.2.1.67] (A)
	evm.model.Contig10440.3	39.2731	homeobox-leucine zipper protein HAT22-like; K09338 homeobox-leucine zipper protein (A)
	evm.model.Contig14326.569	37.2873	transcription factor PIF3-like; K12126 phytochrome-interacting factor 3 (A)
	evm.model.Contig7167.85	37.0229	family of serine hydrolases 3-like; K02183 calmodulin (A)
	evm.model.Contig11518.67	35.51	serine-threonine protein kinase, plant-type, putative; K04730 interleukin-1 receptor-associated kinase 1 [EC:2.7.11.1] (A)
	evm.model.Contig3230.146	35.4569	hypothetical protein; K19891 glucan endo-1,3-beta-glucosidase 1/2/3 [EC:3.2.1.39] (A)
	evm.model.Contig5252.764	34.6815	serine/threonine-protein kinase BLUS1; K08835 serine/threonine-protein kinase OSR1/STK39 [EC:2.7.11.1] (A)
	evm.model.Contig5252.980	34.6799	trimethylguanosine synthase; K14292 trimethylguanosine synthase [EC:2.1.1.-] (A)
	evm.model.Contig5482.344	33.0877	PREDICTED: EPIDERMAL PATTERNING FACTOR-like protein 5 [Jatropha curcas]
	evm.model.Contig9220.987	32.9474	auxin-induced protein X15-like; K14488 SAUR family protein (A)
	evm.model.Contig11642.720	31.8168	PREDICTED: pentatricopeptide repeat-containing protein At2g15690-like isoform X1 [Jatropha curcas]
	evm.model.Contig14326.78	31.2058	unknown function
	evm.model.Contig2712.852	30.9614	protein NRT1/ PTR FAMILY 4.6; K14638 solute carrier family 15 (peptide/histidine transporter), member 3/4 (A)
	evm.model.Contig2581.201	30.4624	probable LRR receptor-like serine/threonine-protein kinase At3g47570; K13420 LRR receptor-like serine/threonine-protein kinase FLS2 [EC:2.7.11.1] (A)
	evm.model.Contig9868.368	29.4414	inositol transporter 1; K08150 MFS transporter, SP family, solute carrier family 2 (myo-inositol transporter), member 13 (A)
	evm.model.Contig2712.661	29.3853	WUSCHEL-related homeobox 8; K18490 homeobox protein OTX2 (A)
	evm.model.Contig3098.196	29.0434	rop guanine nucleotide exchange factor 12; K10418 dynein light chain LC8-type (A)
	evm.model.Contig11642.1263	26.8109	PREDICTED: uncharacterized protein LOC105129421 isoform X2 [Populus euphratica]
	evm.model.Contig2712.207	26.7549	PREDICTED: root phototropism protein 2 [Jatropha curcas]
	evm.model.Contig10660.555	26.1862	unknown function
	evm.model.Contig9220.901	24.8349	hypothetical protein; K16224 senescence-induced receptor-like serine/threonine-protein kinase (A)
	evm.model.Contig5483.300	24.5917	POPTRDRAFT_809416; auxin efflux carrier component 2 family protein; K13947 auxin efflux carrier family (A)
	evm.model.Contig10143.712	23.5355	MADS-box transcription factor 23-like; K09264 MADS-box transcription factor, plant (A)
	evm.model.Contig10440.114	22.2056	hypothetical protein; K05208 glutamate receptor ionotropic, NMDA 1 (A)
	evm.model.Contig2581.781	22.1887	hypothetical protein; K06236 collagen, type I, alpha (A)
	evm.model.Contig10660.220	22.0237	POPTRDRAFT_258873; thioredoxin family protein; K03671 thioredoxin 1 (A)
	evm.model.Contig8573.355	21.6722	POPTRDRAFT_805321; hypothetical protein; K07964 heparanase 1 [EC:3.2.1.166] (A)
S2seed coat	evm.model.Contig10660.126	36.0855	Myb domain protein 21; K09422 myb proto-oncogene protein, plant (A)
S2embryo	evm.model.Contig7167.432	84120.2	GRP3S, putative [Ricinus communis]
	evm.model.Contig11642.1256	29560.4	unknown function
	evm.model.Contig11642.1343	27078.2	unknown function
	evm.model.Contig3230.176	11901.7	POPTRDRAFT_652073; Chlorophyll a-b binding protein 2; K08912 light-harvesting complex II chlorophyll a/b binding protein 1 (A)
	evm.model.Contig33180.51	5276.71	glutaredoxin domain-containing cysteine-rich protein 1; K17479 glutaredoxin domain-containing cysteine-rich protein 1 (A)
	evm.model.Contig5373.64	808.294	serine-pyruvate aminotransferase, putative (EC:2.6.1.45); K00830 alanine-glyoxylate transaminase / serine-glyoxylate transaminase / serine-pyruvate transaminase [EC:2.6.1.44 2.6.1.45 2.6.1.51] (A)
	evm.model.Contig10143.283	604.268	Anthranilate N-benzoyltransferase protein, putative (EC:2.3.1.144); K13065 shikimate O-hydroxycinnamoyltransferase [EC:2.3.1.133] (A)
	evm.model.Contig2712.119	272.489	peroxisomal (S)-2-hydroxy-acid oxidase; K11517 (S)-2-hydroxy-acid oxidase [EC:1.1.3.15] (A)
	evm.model.Contig8624.234	224.037	unknown function
	evm.model.Contig8624.759	160.684	PEPN; aminopeptidase N (EC:3.4.11.2); K01256 aminopeptidase N [EC:3.4.11.2] (A)
	evm.model.Contig5386.714	144.918	PREDICTED: transcription activator GLK1-like [Populus euphratica]
	evm.model.Contig5252.1057	88.1967	calcineurin B-like protein 4; K06268 serine/threonine-protein phosphatase 2B regulatory subunit (A)
	evm.model.Contig5386.747	85.396	glycerolipase A1; K16818 phospholipase A1 [EC:3.1.1.32] (A)
	evm.model.Contig29751.190	66.2594	phosphoglycerate mutase, putative (EC:5.4.2.1); K15637 serine/threonine-protein phosphatase PGAM5 [EC:3.1.3.16] (A)
	evm.model.Contig2712.911	62.4789	trehalose-6-phosphate synthase, putative (EC:2.4.1.15 3.1.3.12); K16055 trehalose 6-phosphate synthase/phosphatase [EC:2.4.1.15 3.1.3.12] (A)
	evm.model.Contig11518.83	32.2951	glutathione reductase, chloroplastic-like; K00383 glutathione reductase (NADPH) [EC:1.8.1.7] (A)
	evm.model.Contig5386.494	29.4125	probable threonine--tRNA ligase, cytoplasmic; K01868 threonyl-tRNA synthetase [EC:6.1.1.3] (A)
	evm.model.Contig2800.400	24.6531	PREDICTED: aluminum-activated malate transporter 9-like [Pyrus x bretschneideri]
	evm.model.Contig120266.1	24.0111	PREDICTED: NAD(P)H-quinone oxidoreductase subunit N, chloroplastic [Jatropha curcas]
	evm.model.Contig5483.468	21.2424	Myb domain protein 84, putative; K09422 myb proto-oncogene protein, plant (A)
	evm.model.Contig9867.418	20.2107	POPTRDRAFT_830521; pirin-like family protein; K06911 uncharacterized protein (A)
S3seed.coat	evm.model.Contig2712.1283	735.97	LRR receptor-like serine/threonine-protein kinase FLS2; K13420 LRR receptor-like serine/threonine-protein kinase FLS2 [EC:2.7.11.1] (A)
	evm.model.Contig8624.254	344.947	monooxygenase, putative (EC:1.14.13.8); K11816 indole-3-pyruvate monooxygenase [EC:1.14.13.168] (A)
	evm.model.Contig5252.823	173.1	protein NRT1/ PTR FAMILY 5.2-like; K14638 solute carrier family 15 (peptide/histidine transporter), member 3/4 (A)
	evm.model.Contig9868.122	108.359	cytochrome P450 family protein; K09755 ferulate-5-hydroxylase [EC:1.14.-.-] (A)
	evm.model.Contig9220.79	106.746	transcription factor TGA2; K14431 transcription factor TGA (A)
	evm.model.Contig5483.182	90.7622	S-adenosylmethionine decarboxylase proenzyme-like; K01611 S-adenosylmethionine decarboxylase [EC:4.1.1.50] (A)
	evm.model.Contig2581.243	77.7397	PREDICTED: uncharacterized protein LOC102608272 [Citrus sinensis]
	evm.model.Contig75.114	73.8075	Uncharacterized protein TCM_024608 [Theobroma cacao]
	evm.model.Contig5482.363	44.6503	vinorine synthase-like; K13065 shikimate O-hydroxycinnamoyltransferase [EC:2.3.1.133] (A)
	evm.model.Contig5483.87	26.484	unknown function
S3axis	evm.model.Contig2581.889	536.863	POPTRDRAFT_758079; ovule development family protein; K09285 AP2-like factor, ANT lineage (A)
	evm.model.Contig2685.813	381.706	MATE efflux family protein 9-like; K03327 multidrug resistance protein, MATE family (A)
	evm.model.Contig2685.1107	237.043	uncharacterized LOC101866726; K10840 centrin-2 (A)
	evm.model.Contig9868.575	96.0155	hypothetical protein POPTR_0010s15480g [Populus trichocarpa]
	evm.model.Contig10660.501	93.0124	probable protein phosphatase 2C 73-like; K19704 protein phosphatase PTC1 [EC:3.1.3.16] (A)
	evm.model.Contig8573.406	78.1977	PREDICTED: probable root meristem growth factor 8 isoform X2 [Populus euphratica]
	evm.model.Contig8573.176	65.1723	ADP-ribosylation factor 2; K07937 ADP-ribosylation factor 1 (A)
	evm.model.Contig11642.1407	62.4046	PREDICTED: uncharacterized protein LOC102623769 [Citrus sinensis]
	evm.model.Contig2712.1360	32.73	PREDICTED: probable membrane-associated kinase regulator 5 [Jatropha curcas]
	evm.model.Contig10143.915	20.6725	uncharacterized LOC101254423; K00276 primary-amine oxidase [EC:1.4.3.21] (A)
	evm.model.Contig11642.1216	20.2069	probable fructose-bisphosphate aldolase 3, chloroplastic; K01623 fructose-bisphosphate aldolase, class I [EC:4.1.2.13] (A)
	evm.model.Contig9868.65	20.082	ABSCISIC ACID-INSENSITIVE 5-like protein 2; K14432 ABA responsive element binding factor (A)
	evm.model.Contig2712.275	20.0377	ABC transporter E family member 2; K06174 ATP-binding cassette, sub-family E, member 1 (A)
S3coty	evm.model.Contig3098.214	40.457	hypothetical protein; K17800 LETM1 and EF-hand domain-containing protein 1, mitochondrial (A)
	evm.model.Contig4530.1	25.1562	Os06g0598500; K01601 ribulose-bisphosphate carboxylase large chain [EC:4.1.1.39] (A)
S4seed.coat	evm.model.Contig2712.1640	309.27	probable fructose-bisphosphate aldolase 3, chloroplastic; K01623 fructose-bisphosphate aldolase, class I [EC:4.1.2.13] (A)
	evm.model.Contig14326.322	287.806	MADS-box transcription factor 6-like; K09264 MADS-box transcription factor, plant (A)
	evm.model.Contig10143.850	84.6557	polygalacturonase At1g48100-like; K01184 polygalacturonase [EC:3.2.1.15] (A)
	evm.model.Contig9868.515	52.4756	peroxidase 5-like; K00430 peroxidase [EC:1.11.1.7] (A)
	evm.model.Contig2685.629	38.541	probable fructose-bisphosphate aldolase 3, chloroplastic; K01623 fructose-bisphosphate aldolase, class I [EC:4.1.2.13] (A)
	evm.model.Contig8624.705	26.4736	PREDICTED: uncharacterized protein LOC105637045 [Jatropha curcas]
S4axis	evm.model.Contig9867.546	53680.9	flavonoid 3'-monooxygenase-like; K07408 cytochrome P450, family 1, subfamily A, polypeptide 1 [EC:1.14.14.1] (A)
	evm.model.Contig9867.543	46671.1	Cytochrome P450, family 81, subfamily D, polypeptide 8; K00517 [EC:1.14.-.-] (A)
	evm.model.Contig9867.544	9228.69	hypothetical protein; K12153 phenylalanine N-monooxygenase [EC:1.14.13.124] (A)
	evm.model.Contig5387.449	1973.52	PREDICTED: GDSL esterase/lipase At5g33370-like [Jatropha curcas]
	evm.model.Contig5252.165	1174.96	exopolygalacturonase-like; K01213 galacturan 1,4-alpha-galacturonidase [EC:3.2.1.67] (A)
	evm.model.Contig10143.940	866.497	transcription factor bHLH140; K10863 aprataxin [EC:3.-.-.-] (A)
	evm.model.Contig3230.116	817.521	tyrosine/DOPA decarboxylase 2-like; K01592 tyrosine decarboxylase [EC:4.1.1.25] (A)
	evm.model.Contig2800.278	680.387	MADS-box transcription factor 3-like; K09264 MADS-box transcription factor, plant (A)
	evm.model.Contig131792.1	572.771	myoinositol oxygenase, putative (EC:1.13.99.1); K00469 inositol oxygenase [EC:1.13.99.1] (A)
	evm.model.Contig5252.163	546.412	PREDICTED: keratin-associated protein 6-2 [Vitis vinifera]
	evm.model.Contig5252.743	494.933	POPTRDRAFT_643213; auxin-induced protein aux28; K14484 auxin-responsive protein IAA (A)
	evm.model.Contig5387.309	320.583	hypothetical protein; K19861 benzyl alcohol O-benzoyltransferase [EC:2.3.1.196 2.3.1.232] (A)
	evm.model.Contig3230.78	235.51	POPTRDRAFT_177524; hypothetical protein; K01054 acylglycerol lipase [EC:3.1.1.23] (A)
	evm.model.Contig14326.525	232.221	transcription regulator, putative [Ricinus communis]
	evm.model.Contig2581.465	178.78	hypothetical protein; K00679 phospholipid:diacylglycerol acyltransferase [EC:2.3.1.158] (A)
	evm.model.Contig5252.1166	154.979	multidrug resistance pump, putative; K03327 multidrug resistance protein, MATE family (A)
	evm.model.Contig9868.763	153.011	flavonol synthase/flavanone 3-hydroxylase-like; K05278 flavonol synthase [EC:1.14.11.23] (A)
	evm.model.Contig5482.371	143.077	unknown function
	evm.model.Contig3098.205	123.421	GATA transcription factor 8-like; K17894 GATA-binding protein 2 (A)
	evm.model.Contig3230.271	106.127	alcohol oxidase-related family protein; K17756 long-chain-alcohol oxidase [EC:1.1.3.20] (A)
	evm.model.Contig2581.60	87.0337	probable terpene synthase 13; K15086 (3S)-linalool synthase [EC:4.2.3.25] (A)
	evm.model.Contig3098.116	80.587	pathogenesis-related genes transcriptional activator PTI6-like; K13434 pathogenesis-related genes transcriptional activator PTI6 (A)
	evm.model.Contig10660.737	66.5909	hypothetical protein; K15397 3-ketoacyl-CoA synthase [EC:2.3.1.199] (A)
	evm.model.Contig3098.60	53.577	anthocyanidin 5,3-O-glucosyltransferase; K12938 anthocyanidin 5,3-O-glucosyltransferase [EC:2.4.1.-] (A)
	evm.model.Contig9220.426	49.8551	hypothetical protein RCOM_1355100 [Ricinus communis]
	evm.model.Contig5252.1372	47.237	sugar transporter ERD6-like 5; K08145 MFS transporter, SP family, solute carrier family 2 (facilitated glucose transporter), member 8 (A)
	evm.model.Contig2685.843	45.932	Uncharacterized protein TCM_037833 [Theobroma cacao]
	evm.model.Contig33180.348	29.0238	deacetylvindoline O-acetyltransferase-like; K13065 shikimate O-hydroxycinnamoyltransferase [EC:2.3.1.133] (A)
	evm.model.Contig5483.682	28.6014	PREDICTED: cytokinin riboside 5'-monophosphate phosphoribohydrolase LOG8 [Populus euphratica]
	evm.model.Contig3230.270	20.4766	hypothetical protein; K17756 long-chain-alcohol oxidase [EC:1.1.3.20] (A)
S4coty	evm.model.Contig9867.556	1079.96	PREDICTED: non-specific lipid-transfer protein 2 [Populus euphratica]
	evm.model.Contig2685.74	677.882	peroxidase N; K00430 peroxidase [EC:1.11.1.7] (A)
	evm.model.Contig2712.964	212.832	lysM domain receptor-like kinase 3; K04733 interleukin-1 receptor-associated kinase 4 [EC:2.7.11.1] (A)
	evm.model.Contig5387.154	124.094	protein phosphatase inhibitor protein; K17553 protein phosphatase 1 regulatory subunit 11 (A)
	evm.model.Contig5386.966	87.4221	ATP binding cassette subfamily B4 isoform 1; K05658 ATP-binding cassette, subfamily B (MDR/TAP), member 1 [EC:3.6.3.44] (A)
	evm.model.Contig8573.239	37.5097	PREDICTED: UPF0392 protein RCOM_0530710 [Jatropha curcas]
	evm.model.Contig3364.128	36.8556	Transducin/WD40 repeat-like superfamily protein; K14962 COMPASS component SWD2 (A)
	evm.model.Contig2712.1062	28.3223	molybdenum cofactor sulfurase-like; K15631 molybdenum cofactor sulfurtransferase [EC:2.8.1.9] (A)
	evm.model.Contig5386.205	25.1782	PREDICTED: transmembrane protein 220 [Jatropha curcas]
	evm.model.Contig5386.887	20.8204	hypothetical protein POPTR_0002s17520g [Populus trichocarpa]

## Sheet: Table S5
Table S5 Metabolic and response genes of ABA, GA, BR, cytokinin, auxin and ethylene that are used in hormone network construction
Gene ID	Gene name
evm.model.Contig9220.445	SAM-1
evm.model.Contig2712.1602	SAM-2
evm.model.Contig9868.628	SAM-3
evm.model.Contig5386.978	SAM-4
evm.model.Contig5252.488	SAM-5
evm.model.Contig11642.1594	SAM-6
evm.model.Contig33180.230	ACS-1
evm.model.Contig33180.131	ACS-2
evm.model.Contig14326.185	ACS-3
evm.model.Contig5386.526	ACO-1
evm.model.Contig70607.69	ACO-2
evm.model.Contig5252.183	ACO-3
evm.model.Contig12381.551	ETR-1
evm.model.Contig12381.332.1	ETR-2
evm.model.Contig9867.251	ETR-3
evm.model.Contig2685.86	ETR-4
evm.model.Contig5252.1293	ETR-5
evm.model.Contig11642.1206	ETR-6
evm.model.Contig9220.501	CTR-1
evm.model.Contig7167.46	CTR-2
evm.model.Contig11642.1113	MKK4_5-1
evm.model.Contig16184.112	MKK4_5-2
evm.model.Contig9867.517	MPK6-1
evm.model.Contig11642.1513	MPK6-2
evm.model.Contig9220.415	EIN2-1
evm.model.Contig11642.540	EIN2-2
evm.model.Contig5373.443	EIN3-1
evm.model.Contig2581.898	EIN3-2
evm.model.Contig5373.6.1	EIN3-3
evm.model.Contig5483.38	EBF1_2-1
evm.model.Contig2685.1212	EBF1_2-2
evm.model.Contig5482.201	EBF1_2-3
evm.model.Contig5252.779	ERF1-1
evm.model.Contig11642.1221	ERF1-2
evm.model.Contig12381.631	KS-1
evm.model.Contig3230.46	KS-2
evm.model.Contig2712.40.1	KS-3
evm.model.Contig70607.85	KS-4
evm.model.Contig8624.72	KO
evm.model.Contig64.10	KAO1-1
evm.model.Contig2712.2041	KAO1-2
evm.model.Contig5386.1073	GA20ox-1
evm.model.Contig9868.791	GA20ox-2
evm.model.Contig14326.170	GA20ox-3
evm.model.Contig2712.1242	GA20ox-4
evm.model.Contig5386.1290	GA20ox-5
evm.model.Contig10143.496	GA20ox-6
evm.model.Contig5483.824	GA3OX-1
evm.model.Contig14326.1112	GA3OX-2
evm.model.Contig5483.356	GA3OX-3
evm.model.Contig3230.153	GA2OX-1
evm.model.Contig2712.131	GA2OX-2
evm.model.Contig5386.993	GA2OX-3
evm.model.Contig5252.505	GA2OX-4
evm.model.Contig11642.1575	GA2OX-5
evm.model.Contig3364.36	GA2OX-6
evm.model.Contig5386.1220	GA2OX-7
evm.model.Contig75.40	GA2OX-8
evm.model.Contig5252.1367	GID1-1
evm.model.Contig5252.654	GID1-2
evm.model.Contig12381.261	GID1-3
evm.model.Contig5386.6	GID1-4
evm.model.Contig10143.912	GID2-1
evm.model.Contig10440.74	GID2-2
evm.model.Contig5483.350	DELLA-1
evm.model.Contig3364.136	DELLA-2
evm.model.Contig9868.674	DELLA-3
evm.model.Contig11642.1656	DELLA-4
evm.model.Contig75.145	DELLA-5
evm.model.Contig14326.358	DELLA-6
evm.model.Contig14326.597	DELLA-7
evm.model.Contig11642.1532	DELLA-8
evm.model.Contig5252.1493	PIF3-1
evm.model.Contig166914.12	PIF3-2
evm.model.Contig5252.396	PIF4
evm.model.Contig11642.422	SPY
evm.model.Contig2712.167	PHYE-1
evm.model.Contig11642.1548	PHYE-2
evm.model.Contig5386.466	PHYE-3
evm.model.Contig166914.6	PHYE-4
evm.model.Contig2800.377	BCH-1
evm.model.Contig14326.83	BCH-2
evm.model.Contig2712.1346	BCH-3
evm.model.Contig9868.281	ZEP/ABA1
evm.model.Contig9867.335	NCED-1
evm.model.Contig3230.144	NCED-2
evm.model.Contig2712.127	NCED-3
evm.model.Contig5373.58	NCED-4
evm.model.Contig2581.836	NCED-5
evm.model.Contig12381.274	ABA2-1
evm.model.Contig5386.982	ABA2-2
evm.model.Contig75.52	ABA2-3
evm.model.Contig14326.505	ABA2-4
evm.model.Contig10143.413	AAO-1
evm.model.Contig8624.426	AAO-2
evm.model.Contig2685.51	ABA3-1
evm.model.Contig17595.19	CYP707A-1
evm.model.Contig10143.946	CYP707A-2
evm.model.Contig11642.729	CYP707A-3
evm.model.Contig10440.117	CYP707A-4
evm.model.Contig9220.896	CYP707A-5
evm.model.Contig2581.717	CYP707A-6
evm.model.Contig3230.274	CYP707A-7
evm.model.Contig9220.538	ABI5-1
evm.model.Contig11642.435	ABI5-2
evm.model.Contig5252.872	ABI3
evm.model.Contig14326.808	FUS3-1
evm.model.Contig2712.1836	FUS3-2
evm.model.Contig14326.889	ABI4-1
evm.model.Contig2712.1739	ABI4-2
evm.model.Contig8624.509	LEC1
evm.model.Contig2581.158	LEC2
evm.model.Contig12381.33	PYL/PYR-1
evm.model.Contig5483.706	PYL/PYR-2
evm.model.Contig2800.439	PYL/PYR-3
evm.model.Contig2800.64	PYL/PYR-4
evm.model.Contig2685.294	PYL/PYR-5
evm.model.Contig11642.375	PYL/PYR-6
evm.model.Contig33180.423	PYL/PYR-7
evm.model.Contig33180.75	PYL/PYR-8
evm.model.Contig14326.1062	PYL/PYR-9
evm.model.Contig14326.863	PYL/PYR-10
evm.model.Contig9220.152	PYL/PYR-11
evm.model.Contig3098.324	PP2C-1
evm.model.Contig14326.1041	PP2C-2
evm.model.Contig5483.672	PP2C-3
evm.model.Contig2581.703	PP2C-4
evm.model.Contig5373.192	PP2C-5
evm.model.Contig2685.675	PP2C-6
evm.model.Contig2685.824	PP2C-7
evm.model.Contig14326.177.1	PP2C-8
evm.model.Contig2712.1389	PP2C-9
evm.model.Contig241910.1	PP2C-10
evm.model.Contig9868.756	SnRK2-1
evm.model.Contig5252.896	SnRK2-2
evm.model.Contig5387.58	SnRK2-3
evm.model.Contig2800.127	SnRK2-4
evm.model.Contig9867.91.1	SnRK2-5
evm.model.Contig10143.653	SnRK2-6
evm.model.Contig10143.942.3	ABF-1
evm.model.Contig11642.1107	ABF-2
evm.model.Contig16184.127	ABF-3
evm.model.Contig9220.893.2	ABF-4
evm.model.Contig2712.750	ABF-5
evm.model.Contig10143.447	ABF-6
evm.model.Contig8624.308	ABF-7
evm.model.Contig2581.320	ABF-8
evm.model.Contig10143.597	ABF-9
evm.model.Contig8624.609	ABF-10
evm.model.Contig10440.113	ABF-11
evm.model.Contig5387.98	ABF-12
evm.model.Contig10440.112	ABF-13
evm.model.Contig5386.245	CYP90B1
evm.model.Contig5386.430	CYP724B1-1
evm.model.Contig14326.917	CYP7A1-1
evm.model.Contig2712.1752	CYP7A1-2
evm.model.Contig9220.225	DET
evm.model.Contig9867.641	BR6OX-2
evm.model.Contig12381.555	BAS1-1
evm.model.Contig5483.335	BAS1-2
evm.model.Contig8573.397	BAS1-3
evm.model.Contig9867.36	BRI-1
evm.model.Contig2712.366	BRI-2
evm.model.Contig7167.574	BRI-3
evm.model.Contig75.63	BRI-4
evm.model.Contig5387.110	BAK1
evm.model.Contig10143.955	BKI1
evm.model.Contig12381.390_evm.model.Contig12381.391	BSK-1
evm.model.Contig64.12	BSK-2
evm.model.Contig2800.334	BSK-3
evm.model.Contig7167.219	BSK-4
evm.model.Contig5373.178	BSK-5
evm.model.Contig11642.30	BSK-6
evm.model.Contig9220.1156	BSK-7
evm.model.Contig9220.243	BSK-8
evm.model.Contig5386.749	BIN2-1
evm.model.Contig29751.228	BIN2-2
evm.model.Contig2581.198	BIN2-3
evm.model.Contig5386.221	BZR1_2-1
evm.model.Contig9868.187	BZR1_2-2
evm.model.Contig8624.46	BZR1_2-3
evm.model.Contig2581.173	BZR1_2-4
evm.model.Contig5386.99	CYCD3-1
evm.model.Contig9868.316	CYCD3-2
evm.model.Contig10143.920	CYCD3-3
evm.model.Contig11642.754	CYCD3-4
evm.model.Contig10440.82	CYCD3-5
evm.model.Contig9220.875	CYCD3-6
evm.model.Contig5386.869	YUC-1
evm.model.Contig5482.242	YUC-2
evm.model.Contig14326.1117	YUC-3
evm.model.Contig5482.268	YUC-4
evm.model.Contig5483.388	YUC-5
evm.model.Contig5252.640	YUC-6
evm.model.Contig5252.641	YUC-7
evm.model.Contig8624.254	YUC-8
evm.model.Contig14326.417	TAA-1
evm.model.Contig2712.962	TAA-2
evm.model.Contig9220.859	UDPG-SGTase
evm.model.Contig9220.205	AUX-1
evm.model.Contig10143.576	AUX-2
evm.model.Contig7167.208	AUX-3
evm.model.Contig11642.326	AUX-4
evm.model.Contig14326.925	AUX-5
evm.model.Contig9220.1088	AUX-6
evm.model.Contig12381.59	IAA-1
evm.model.Contig12381.146	IAA-2
evm.model.Contig5386.956	IAA-3
evm.model.Contig5483.771	IAA-4
evm.model.Contig5483.819	IAA-5
evm.model.Contig5483.51	IAA-6
evm.model.Contig5483.731	IAA-7
evm.model.Contig9867.304	IAA-8
evm.model.Contig9867.150	IAA-9
evm.model.Contig2685.846	IAA-10
evm.model.Contig2685.208	IAA-11
evm.model.Contig2685.1197	IAA-12
evm.model.Contig10143.1037	IAA-13
evm.model.Contig7167.24	IAA-14
evm.model.Contig5252.842	IAA-15
evm.model.Contig5252.1314	IAA-16
evm.model.Contig5252.743	IAA-17
evm.model.Contig11642.1288	IAA-18
evm.model.Contig10660.744	IAA-19
evm.model.Contig3098.241	IAA-20
evm.model.Contig3098.147	IAA-21
evm.model.Contig3098.220	IAA-22
evm.model.Contig14326.1080	IAA-23
evm.model.Contig5482.289	IAA-24
evm.model.Contig5387.502	IAA-25
evm.model.Contig2712.500	IAA-26
evm.model.Contig12381.282	TIR1-1
evm.model.Contig10143.690	TIR1-2
evm.model.Contig7167.83	TIR1-3
evm.model.Contig5252.635	TIR1-4
evm.model.Contig2712.1838	TIR1-5
evm.model.Contig5386.879	ARF-1
evm.model.Contig5483.21	ARF-2
evm.model.Contig2800.462	ARF-3
evm.model.Contig2685.1239	ARF-4
evm.model.Contig10143.803	ARF-5
evm.model.Contig5252.949	ARF-6
evm.model.Contig87275.1	ARF-7
evm.model.Contig29751.225	ARF-8
evm.model.Contig14326.980	ARF-9
evm.model.Contig5387.40_evm.model.Contig5387.41	ARF-10
evm.model.Contig2712.98	ARF-11
evm.model.Contig2712.1111	ARF-12
evm.model.Contig2581.555	ARF-13
evm.model.Contig3230.121	ARF-14
evm.model.Contig9220.848	GH3-1
evm.model.Contig12381.312	GH3-2
evm.model.Contig5386.84	GH3-3
evm.model.Contig5386.617	GH3-4
evm.model.Contig5386.1187	GH3-5
evm.model.Contig5386.652	GH3-6
evm.model.Contig11642.778	GH3-7
evm.model.Contig12381.597	SAUR-1
evm.model.Contig5386.899	SAUR-2
evm.model.Contig5483.592	SAUR-3
evm.model.Contig8573.47	SAUR-4
evm.model.Contig2685.449	SAUR-5
evm.model.Contig2685.255	SAUR-6
evm.model.Contig8624.114	SAUR-7
evm.model.Contig10143.88	SAUR-8
evm.model.Contig7167.409	SAUR-9
evm.model.Contig11642.131	SAUR-10
evm.model.Contig11642.528	SAUR-11
evm.model.Contig11642.132	SAUR-12
evm.model.Contig9220.994	SAUR-13
evm.model.Contig3364.257	IPT-1
evm.model.Contig2712.433	IPT-2
evm.model.Contig9867.577	CYP735A-1
evm.model.Contig10660.426	CYP735A-2
evm.model.Contig9220.10	ciszog
evm.model.Contig12381.586	CKX-1
evm.model.Contig5483.503	CKX-2
evm.model.Contig5483.651	CKX-3
evm.model.Contig10143.774	CKX-4
evm.model.Contig7167.323	CKX-5
evm.model.Contig14326.1028	CKX-6
evm.model.Contig3364.77_evm.model.Contig3364.78	AHK-1
evm.model.Contig5386.483	AHK-2
evm.model.Contig8573.68	AHK-3
evm.model.Contig12381.258	AHP-1
evm.model.Contig5483.882	AHP-2
evm.model.Contig9868.468	AHP-3
evm.model.Contig5252.1369	AHP-4
evm.model.Contig5373.544	AHP-5
evm.model.Contig10660.596	AHP-6
evm.model.Contig3098.98	AHP-7
evm.model.Contig8573.114	ARR-B-1
evm.model.Contig5483.124	ARR-B-2
evm.model.Contig2685.1114	ARR-B-3
evm.model.Contig9868.555	ARR-B-4
evm.model.Contig75.110	ARR-B-5
evm.model.Contig10660.494	ARR-B-6
evm.model.Contig5482.155	ARR-B-7
evm.model.Contig8573.231	ARR-A-1
evm.model.Contig10143.535	ARR-A-2
evm.model.Contig10143.135	ARR-A-3
evm.model.Contig8624.690	ARR-A-4
evm.model.Contig8624.199	ARR-A-5
evm.model.Contig6055.277	ARR-A-6
evm.model.Contig2712.884	ARR-A-7

## Sheet: Table S7
Table S7 KEGG enrichment of all temporal-spatial comparisions in viviparous tissues
Groups	ko-number	Genes number in background	Genes number in DEGs	P-value	Pathway
S1ovule-S2seed_down	ko00941	115	25	3.08432e-08	Flavonoid biosynthesis
	ko04075	532	54	0.000271001	Plant hormone signal transduction
	ko00360	78	13	0.000973297	Phenylalanine metabolism
	ko00903	37	8	0.00166155	Limonene and pinene degradation
	ko00380	69	11	0.00334284	Tryptophan metabolism
	ko00940	225	25	0.00351916	Phenylpropanoid biosynthesis
	ko00400	70	11	0.00374828	Phenylalanine, tyrosine and tryptophan biosynthesis
	ko01230	419	39	0.00780425	Biosynthesis of amino acids
	ko00945	71	10	0.0120237	Stilbenoid, diarylheptanoid and gingerol biosynthesis
	ko00363	23	5	0.0120724	Bisphenol degradation
	ko00071	64	9	0.0168961	Fatty acid degradation
	ko04810	136	15	0.0218732	Regulation of actin cytoskeleton
	ko00944	11	3	0.027084	Flavone and flavonol biosynthesis
	ko00280	95	11	0.0333974	Valine, leucine and isoleucine degradation
	ko00300	21	4	0.0379982	Lysine biosynthesis
	ko00140	41	6	0.0396167	Steroid hormone biosynthesis
	ko00624	31	5	0.0405426	Polycyclic aromatic hydrocarbon degradation
S1ovule-S2seed_up	ko04075	532	96	4.48934e-13	Plant hormone signal transduction
	ko00195	67	26	7.60437e-12	Photosynthesis
	ko04712	170	36	1.72023e-07	Circadian rhythm - plant
	ko00363	23	8	0.000370052	Bisphenol degradation
	ko00903	37	10	0.000700037	Limonene and pinene degradation
	ko00531	75	15	0.00122026	Glycosaminoglycan degradation
	ko00945	71	14	0.00201776	Stilbenoid, diarylheptanoid and gingerol biosynthesis
	ko00624	31	8	0.00325714	Polycyclic aromatic hydrocarbon degradation
	ko04978	47	10	0.00483117	Mineral absorption
	ko00902	40	9	0.00499382	Monoterpenoid biosynthesis
	ko00052	142	21	0.00745662	Galactose metabolism
	ko00710	170	24	0.0079411	Carbon fixation in photosynthetic organisms
	ko04626	413	53	0.0012129	Plant-pathogen interaction
	ko00910	39	8	0.0139886	Nitrogen metabolism
	ko04024	108	15	0.0354302	cAMP signaling pathway
	ko00520	236	28	0.038522	Amino sugar and nucleotide sugar metabolism
	ko04022	121	16	0.045152	cGMP-PKG signaling pathway
	ko04744	24	5	0.0454317	Phototransduction
S2embryo-S3axis_down	ko04075	532	82	4.04774e-08	Plant hormone signal transduction
	ko00941	115	23	6.63777e-05	Flavonoid biosynthesis
	ko00531	75	17	0.000117057	Glycosaminoglycan degradation
	ko04712	170	29	0.000166209	Circadian rhythm - plant
	ko00511	129	23	0.000394924	Other glycan degradation
	ko00902	40	10	0.00131114	Monoterpenoid biosynthesis
	ko03030	93	17	0.00162506	DNA replication
	ko04978	47	10	0.0046948	Mineral absorption
	ko03430	63	12	0.00532271	Mismatch repair
	ko03430	63	12	0.00532271	Mismatch repair
	ko04110	197	27	0.00717982	Cell cycle
	ko00944	11	4	0.00985184	Flavone and flavonol biosynthesis
	ko03015	234	29	0.0204962	mRNA surveillance pathway
	ko04142	181	23	0.0279345	Lysosome
	ko00945	71	11	0.0323779	Stilbenoid, diarylheptanoid and gingerol biosynthesis
	ko04810	136	18	0.0337585	Regulation of actin cytoskeleton
	ko04974	40	7	0.0453023	Protein digestion and absorption
	ko00052	142	18	0.0485124	Galactose metabolism
S2embryo-S3axis_up	ko00195	67	35	8.77927e-15	Photosynthesis
	ko00196	25	15	3.48018e-08	Photosynthesis - antenna proteins
	ko00906	50	17	9.13657e-05	Carotenoid biosynthesis
	ko00860	91	24	0.000348643	Porphyrin and chlorophyll metabolism
	ko00500	458	83	0.000579396	Starch and sucrose metabolism
	ko00710	170	37	0.000729271	Carbon fixation in photosynthetic organisms
	ko00250	78	20	0.00152515	Alanine, aspartate and glutamate metabolism
	ko00910	39	12	0.00256515	Nitrogen metabolism
	ko00966	7	4	0.00672751	Glucosinolate biosynthesis
	ko04146	151	30	0.00876297	Peroxisome
	ko00520	236	42	0.015769	Amino sugar and nucleotide sugar metabolism
	ko00030	124	24	0.0237142	Pentose phosphate pathway
	ko01200	491	78	0.0237841	Carbon metabolism
	ko00270	159	29	0.0295082	Cysteine and methionine metabolism
	ko04978	47	11	0.0316758	Mineral absorption
	ko00945	71	15	0.0325681	Stilbenoid, diarylheptanoid and gingerol biosynthesis
	ko00905	31	8	0.0368824	Brassinosteroid biosynthesis
S2embryo-S3coty_down	ko04075	532	83	6.63032e-11	Plant hormone signal transduction
	ko04712	170	34	8.37894e-08	Circadian rhythm - plant
	ko04142	181	32	3.3963e-06	Lysosome
	ko00531	75	18	6.47747e-06	Glycosaminoglycan degradation
	ko00940	225	34	5.34823e-05	Phenylpropanoid biosynthesis
	ko00941	115	21	9.62577e-05	Flavonoid biosynthesis
	ko00511	129	20	0.00125068	Other glycan degradation
	ko00944	11	4	0.00642996	Flavone and flavonol biosynthesis
	ko04744	24	6	0.00682226	Phototransduction
	ko00902	40	8	0.00798927	Monoterpenoid biosynthesis
	ko00130	58	10	0.00943542	Ubiquinone and other terpenoid-quinone biosynthesis
	ko04978	47	8	0.0207078	Mineral absorption
	ko00052	142	17	0.0331009	Galactose metabolism
	ko04020	81	11	0.0356089	Calcium signaling pathway
	ko04020	81	11	0.0356089	Calcium signaling pathway
	ko00901	11	3	0.0424288	Indole alkaloid biosynthesis
S2embryo-S3coty_up	ko00195	67	13	0.00290692	Photosynthesis
	ko04141	380	45	0.0088339	Protein processing in endoplasmic reticulum
	ko00966	7	3	0.0151719	Glucosinolate biosynthesis
	ko00860	91	14	0.0166074	Porphyrin and chlorophyll metabolism
	ko00906	50	9	0.0196807	Carotenoid biosynthesis
	ko00903	37	7	0.0293464	Limonene and pinene degradation
	ko00908	22	5	0.0304387	Zeatin biosynthesis
	ko03018	243	28	0.0446264	RNA degradation
S2sc-S2embryo_down	ko00195	67	38	7.08615e-14	Photosynthesis
	ko00860	91	34	1.20535e-06	Porphyrin and chlorophyll metabolism
	ko03008	147	37	0.00431701	Ribosome biogenesis in eukaryotes
	ko00906	50	16	0.00492863	Carotenoid biosynthesis
	ko00902	40	12	0.0234873	Monoterpenoid biosynthesis
	ko00363	23	8	0.0253919	Bisphenol degradation
	ko00270	159	36	0.0254298	Cysteine and methionine metabolism
	ko00945	71	18	0.0358263	Stilbenoid, diarylheptanoid and gingerol biosynthesis
	ko00073	53	14	0.0436272	Cutin, suberine and wax biosynthesis
	ko00250	78	19	0.0460099	Alanine, aspartate and glutamate metabolism
S2sc-S2embryo_up	ko04075	532	132	7.44887e-12	Plant hormone signal transduction
	ko00941	115	38	1.30212e-07	Flavonoid biosynthesis
	ko00360	78	24	9.35169e-05	Phenylalanine metabolism
	ko04712	170	41	0.000228634	Circadian rhythm - plant
	ko00940	225	50	0.000423688	Phenylpropanoid biosynthesis
	ko04140	111	28	0.00101022	Autophagy
	ko04810	136	32	0.00162402	Regulation of actin cytoskeleton
	ko04142	181	40	0.0016775	Lysosome
	ko04213	116	28	0.00206141	Longevity regulating pathway - multiple species
	ko04141	380	73	0.00219798	Protein processing in endoplasmic reticulum
	ko00350	94	22	0.00857669	Tyrosine metabolism
	ko00942	23	8	0.0095526	Anthocyanin biosynthesis
	ko00944	11	5	0.0114039	Flavone and flavonol biosynthesis
	ko00901	11	5	0.0114039	Indole alkaloid biosynthesis
	ko04744	24	8	0.0126197	Phototransduction
	ko00592	83	19	0.0174992	alpha-Linolenic acid metabolism
	ko00960	57	14	0.0214715	Tropane, piperidine and pyridine alkaloid biosynthesis
	ko04024	108	23	0.0222678	cAMP signaling pathway
	ko00920	48	12	0.0279679	Sulfur metabolism
	ko01220	24	7	0.0395528	Degradation of aromatic compounds
	ko04146	151	29	0.0413868	Peroxisome
	ko00410	91	19	0.0423679	beta-Alanine metabolism
	ko00902	40	10	0.0427202	Monoterpenoid biosynthesis
S3axis-S4axis_down	ko00940	225	29	5.35582e-09	Phenylpropanoid biosynthesis
	ko00941	115	17	1.13251e-06	Flavonoid biosynthesis
	ko00360	78	11	0.00013477	Phenylalanine metabolism
	ko04712	170	16	0.000594849	Circadian rhythm - plant
	ko00710	170	16	0.000594849	Carbon fixation in photosynthetic organisms
	ko00350	94	11	0.000700777	Tyrosine metabolism
	ko00195	67	9	0.000777191	Photosynthesis
	ko00945	71	9	0.00118736	Stilbenoid, diarylheptanoid and gingerol biosynthesis
	ko00520	236	19	0.00130665	Amino sugar and nucleotide sugar metabolism
	ko04022	121	12	0.00177609	cGMP-PKG signaling pathway
	ko00500	458	28	0.00682587	Starch and sucrose metabolism
	ko04210	76	8	0.00696256	Apoptosis 细胞死亡
	ko00942	23	4	0.00939116	Anthocyanin biosynthesis
	ko01200	491	29	0.00941158	Carbon metabolism
	ko01220	24	4	0.0109456	Degradation of aromatic compounds
	ko04744	24	4	0.0109456	Phototransduction
	ko00950	51	6	0.0109939	Isoquinoline alkaloid biosynthesis
	ko04626	413	25	0.0114305	Plant-pathogen interaction
	ko00051	137	11	0.0129602	Fructose and mannose metabolism
	ko00030	124	10	0.0168717	Pentose phosphate pathway
	ko00140	41	5	0.0170451	Steroid hormone biosynthesis
	ko00960	57	6	0.0184091	Tropane, piperidine and pyridine alkaloid biosynthesis
	ko04024	108	9	0.018771	cAMP signaling pathway
	ko04213	116	9	0.0283102	Longevity regulating pathway - multiple species
	ko00592	83	7	0.0339482	alpha-Linolenic acid metabolism
	ko04918	35	4	0.039251	Thyroid hormone synthesis
	ko04145	145	10	0.0432638	Phagosome
S3axis-S4axis_up	ko00908	22	8	1.60534e-07	Zeatin biosynthesis
	ko04075	532	40	1.88536e-07	Plant hormone signal transduction
	ko00905	31	5	0.00231312	Brassinosteroid biosynthesis
	ko04978	47	6	0.00295341	Mineral absorption
	ko00906	50	6	0.00404665	Carotenoid biosynthesis
	ko00904	46	5	0.0128317	Diterpenoid biosynthesis
	ko04712	170	10	0.0365241	Circadian rhythm - plant
S3coty-S4coty_down	ko04978	47	6	0.000172018	Mineral absorption
	ko00030	124	7	0.00661842	Pentose phosphate pathway
	ko00190	193	9	0.00764013	Oxidative phosphorylation
	ko04141	380	14	0.0081905	Protein processing in endoplasmic reticulum
	ko00710	170	8	0.0110074	Carbon fixation in photosynthetic organisms
	ko00940	225	9	0.0192194	Phenylpropanoid biosynthesis
	ko03010	448	14	0.0294444	Ribosome
	ko00051	137	6	0.0352574	Fructose and mannose metabolism
	ko01230	419	13	0.0367689	Biosynthesis of amino acids
	ko04142	181	7	0.0425973	Lysosome
	ko00010	225	8	0.0475831	Glycolysis / Gluconeogenesis
S3coty-S4coty_up	ko04075	532	29	2.25899e-08	Plant hormone signal transduction
	ko04919	77	6	0.00172322	Thyroid hormone signaling pathway
	ko00562	105	6	0.00797401	Inositol phosphate metabolism
	ko03320	37	3	0.0229227	PPAR signaling pathway
	ko00240	224	8	0.0331718	Pyrimidine metabolism
	ko04978	47	3	0.0424435	Mineral absorption
	ko04070	119	5	0.0476053	Phosphatidylinositol signaling system
S3coty-S3axis_down	ko03430	63	16	1.08125e-05	Mismatch repair
	ko04110	197	30	0.000145776	Cell cycle
	ko03030	93	17	0.000471522	DNA replication
	ko04075	532	61	0.000533161	Plant hormone signal transduction
	ko03440	78	14	0.00173259	Homologous recombination
	ko00942	23	6	0.00569983	Anthocyanin biosynthesis
	ko04213	116	16	0.012287	Longevity regulating pathway - multiple species
	ko02010	120	16	0.0166303	ABC transporters
	ko00902	40	7	0.0268939	Monoterpenoid biosynthesis
	ko00240	224	25	0.0282727	Pyrimidine metabolism
	ko00062	54	8	0.0456332	Fatty acid elongation
S3coty-S3axis_up	ko00195	67	27	2.5e-10	Photosynthesis
	ko04146	151	33	4.17e-05	Peroxisome
	ko00500	458	70	0.00112452	Starch and sucrose metabolism
	ko00710	170	30	0.0036282	Carbon fixation in photosynthetic organisms
	ko04712	170	30	0.0036282	Circadian rhythm - plant
	ko00906	50	12	0.00515213	Carotenoid biosynthesis
	ko00940	225	36	0.00803459	Phenylpropanoid biosynthesis
	ko04075	532	74	0.00927566	Plant hormone signal transduction
	ko00520	236	36	0.0164138	Amino sugar and nucleotide sugar metabolism
	ko00630	129	22	0.0168538	Glyoxylate and dicarboxylate metabolism
	ko00910	39	9	0.0187	Nitrogen metabolism
	ko00901	11	4	0.0225987	Indole alkaloid biosynthesis
	ko00531	75	14	0.0249571	Glycosaminoglycan degradation
	ko00330	88	15	0.0431991	Arginine and proline metabolism
	ko04142	181	27	0.0432694	Lysosome
	ko00040	197	29	0.0432908	Pentose and glucuronate interconversions
	ko00073	53	10	0.0497241	Cutin, suberine and wax biosynthesis
S4coty-S4axis_down	ko04110	197	46	3.31302e-09	Cell cycle
	ko03430	63	21	1.11177e-07	Mismatch repair
	ko03030	93	25	7.73111e-07	DNA replication
	ko04075	532	79	1.88828e-05	Plant hormone signal transduction
	ko03420	99	21	0.000248998	Nucleotide excision repair
	ko00511	129	22	0.00370128	Other glycan degradation
	ko00903	37	9	0.00565455	Limonene and pinene degradation
	ko04010	170	26	0.00762434	MAPK signaling pathway
	ko00941	115	19	0.00936739	Flavonoid biosynthesis
	ko04626	413	53	0.00971307	Plant-pathogen interaction
	ko00380	69	13	0.0100935	Tryptophan metabolism
	ko04213	116	19	0.0102554	Longevity regulating pathway - multiple species
	ko04918	35	8	0.0130566	Thyroid hormone synthesis
	ko00960	57	11	0.0144532	Tropane, piperidine and pyridine alkaloid biosynthesis
	ko00942	23	6	0.0160111	Anthocyanin biosynthesis
	ko00950	51	10	0.017278	Isoquinoline alkaloid biosynthesis
	ko00410	91	15	0.019877	beta-Alanine metabolism
	ko00062	54	10	0.0251546	Fatty acid elongation
	ko04141	380	47	0.0257558	Protein processing in endoplasmic reticulum
	ko03440	78	13	0.0265785	Homologous recombination
	ko03410	80	13	0.0320212	Base excision repair
	ko00140	41	8	0.0323732	Steroid hormone biosynthesis
	ko00052	142	20	0.0388717	Galactose metabolism
	ko04024	108	16	0.0406391	cAMP signaling pathway
	ko04712	170	23	0.0423245	Circadian rhythm - plant
	ko04142	181	24	0.0472715	Lysosome
S4coty-S4axis_up	ko04712	170	34	0.0014491	Circadian rhythm - plant
	ko00940	225	42	0.00181054	Phenylpropanoid biosynthesis
	ko04978	47	13	0.00249424	Mineral absorption
	ko00052	142	28	0.00444782	Galactose metabolism
	ko04075	532	83	0.00511257	Plant hormone signal transduction
	ko04146	151	29	0.00565956	Peroxisome
	ko00624	31	9	0.00794368	Polycyclic aromatic hydrocarbon degradation
	ko00906	50	12	0.0120775	Carotenoid biosynthesis
	ko00073	53	12	0.0190425	Cutin, suberine and wax biosynthesis
	ko00471	6	3	0.0250953	D-Glutamine and D-glutamate metabolism
	ko00330	88	17	0.0277648	Arginine and proline metabolism
	ko00195	67	13	0.0485004	Photosynthesis
S2sc-S3sc_down	ko00908	22	9	0.000404095	Zeatin biosynthesis
	ko04712	170	32	0.0030627	Circadian rhythm - plant
	ko04075	532	74	0.0426218	Plant hormone signal transduction
S2sc-S3sc_up	ko00941	115	23	2.40805e-10	Flavonoid biosynthesis
	ko04141	380	34	1.8973e-05	Protein processing in endoplasmic reticulum
	ko00195	67	8	0.00595252	Photosynthesis
	ko04145	145	13	0.00676598	Phagosome
	ko00400	70	8	0.00774196	Phenylalanine, tyrosine and tryptophan biosynthesis
	ko00945	71	8	0.00842	Stilbenoid, diarylheptanoid and gingerol biosynthesis
	ko00940	225	17	0.0116428	Phenylpropanoid biosynthesis
	ko04918	35	5	0.0134048	Thyroid hormone synthesis
	ko00360	78	8	0.0144742	Phenylalanine metabolism
	ko04744	24	4	0.0155029	Phototransduction
	ko04110	197	15	0.0160387	Cell cycle
	ko00062	54	6	0.0226608	Fatty acid elongation
	ko00966	7	2	0.0307412	Glucosinolate biosynthesis
S3sc-S4sc_down	ko03010	448	16	4.43068e-08	Ribosome
	ko04213	116	6	0.000117009	Longevity regulating pathway - multiple species
	ko04141	380	10	0.000210029	Protein processing in endoplasmic reticulum
	ko00440	11	2	0.00225176	Phosphonate and phosphinate metabolism
	ko04010	170	5	0.00528792	MAPK signaling pathway
	ko04144	349	7	0.00826071	Endocytosis
	ko03008	147	4	0.0160189	Ribosome biogenesis in eukaryotes
	ko03040	309	6	0.0163063	Spliceosome
S3sc-S4sc_up	ko04626	413	16	0.00116333	Plant-pathogen interaction
	ko04712	170	8	0.00640918	Circadian rhythm - plant
	ko04075	532	16	0.0129318	Plant hormone signal transduction
	ko00905	31	3	0.0133027	Brassinosteroid biosynthesis
	ko00040	197	7	0.0407324	Pentose and glucuronate interconversions
